# Supplementary material for: Synthesis of pyrrolidine homoazasugars and 3,4-dihydroxy-5-hydroxymethylprolines using aldol additions of metalated bislactim ethers to 2,4-O-ethylidene-d-erythroses
Source: Royal Society of Chemistry journal article supplement (doi:10.1039/b902366f), 2009-01-01

# Synthesis of pyrrolidine homoazasugars and 3,4-dihydroxy-5-hydroxymethylprolines using aldol additions of metalated bislactim ethers to 2,4-*O*-ethylidene-D-erythroses

Olga Blanco, Cristina Pato, María Ruiz\* and Vicente Ojea\*

*Departamento de Química Fundamental, Facultade de Ciencias, Universidade da Coruña, Campus da  
Zapateira s/n, 15071 A Coruña, Spain. Fax: +34 981167065; Tel: +34 981167000; E-mail:  
ojea@udc.es*

## Electronic Supplementary Information

### Table of Contents

|                                                                                                                              |          |
|------------------------------------------------------------------------------------------------------------------------------|----------|
| 1. Computational methods.....                                                                                                | page S2  |
| Figure S1: High-level and low level layers for ONIOM calculations .....                                                      | page S2  |
| Figure S2: Felkin-Anh, modified-Cornforth and non-Anh models .....                                                           | page S3  |
| Figure S3: TSs for 3,6-cis diastereomeric pathways in the reaction of SnCl <sup>+</sup> 10 <sup>-</sup> and <b>11b</b> ..... | page S4  |
| Figure S3: TSs for 3,6-cis diastereomeric pathways in the reaction of SnCl <sup>+</sup> 10 <sup>-</sup> and <b>11c</b> ..... | page S4  |
| Tables S1 and S2: Absolute and relative energies for TSs .....                                                               | page S5  |
| 2. Cartesian coordinates of reported structures.....                                                                         | page S6  |
| 3. References.....                                                                                                           | page S14 |
| 4. NMR spectra.....                                                                                                          | page S15 |

## 1. Computational methods.

The conformational space accessible to the models was analyzed first by using hybrid methods, considering a two-layer scheme (DFT:semiempirical) and the ONIOM method for the partition of the system.<sup>1</sup> The DFT description (B3LYP method, using LANL2DZ basis set<sup>2</sup>) was limited to an “inner layer” including the critical parts of the reacting system: the atoms directly involved in the breaking and forming bonds and other areas sensitive to electronic effects. For the low-level treatment of the entire system, we employed the semiempirical AM1 method<sup>3</sup> (see Figure S1). Thus, the conformational space accessible to the azaenolate moiety was sampled by considering three different rotamers for the isopropyl group (those with the tertiary carbon atom pointing to the metal atom, to the nucleophilic carbon atom or to the imidate moiety) and two rotamers for each of the methoxy groups (directed to or opposite to the imidate nitrogen). In addition, for the erythrose moiety, three different rotamers for the benzyloxy group were studied. Significant structures located with these conformational analyses were fully reoptimized at B3LYP/cc-pVDZ-PP level.

**Figure S1.** High-level (B3LYP/LANL2DZ) and low-level (AM1) layers for the ONIOM calculations.

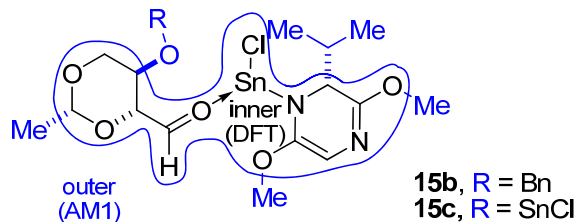

**Figure S2.** Felkin-Anh, modified-Cornforth and non-Anh models for azaenolate addition to 2,4-ethylidene-D-erythrose derivative.

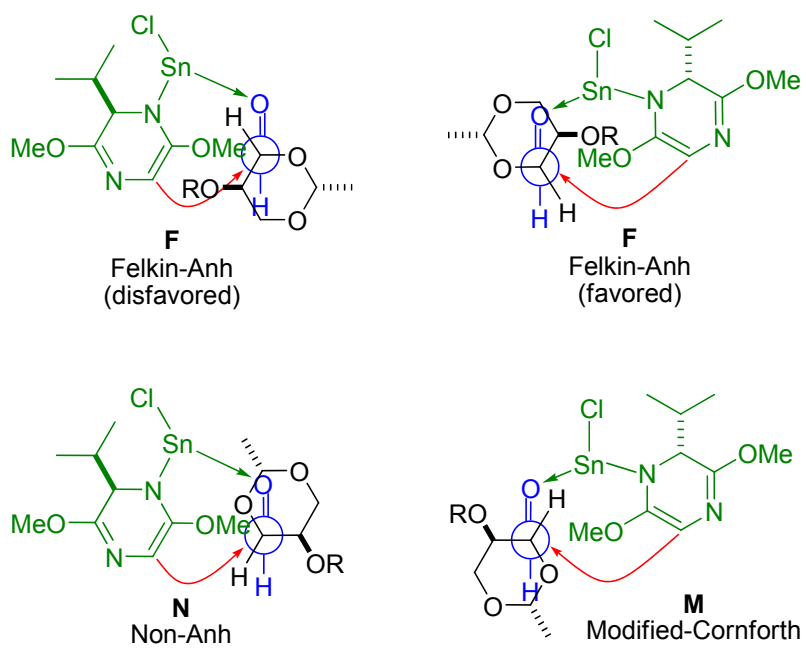

**Figure S3.** Chem3D representations of the most favored TSs located in the gas 3,6-*cis* diastereomeric pathways (at B3LYP/cc-pVDZ-PP level) for the reaction between azaenolate  $\text{SnCl}^+\mathbf{10}^-$  and benzylated erythrose ethylidene **11b**. Relative energies in THF (at B3LYP(SCRf)/cc-pVTZ-PP level using the PCM method) are shown in parenthesis in  $\text{kcal mol}^{-1}$ . Distances are in angstroms. The hydrogen atoms are omitted for clarity except at chiral and reaction centers.

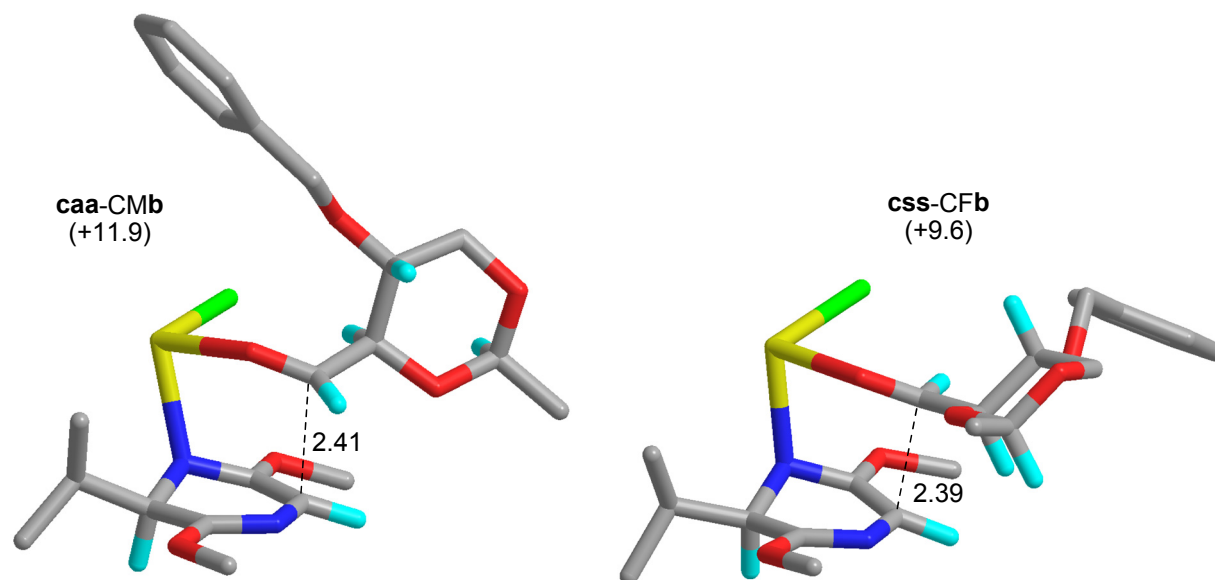

**Figure S4.** Chem3D representations of the most favored TSs located in the gas 3,6-*cis* diastereomeric pathways (at B3LYP/cc-pVDZ-PP level) for the reaction between azaenolate  $\text{SnCl}^+\mathbf{10}^-$  and “unprotected” erythrose ethylidene **11c**. Relative energies in THF (at B3LYP(SCRf)/cc-pVTZ-PP level using the PCM method) are shown in parenthesis in  $\text{kcal mol}^{-1}$ . Distances are in angstroms. The hydrogen atoms are omitted for clarity except at chiral and reaction centers.

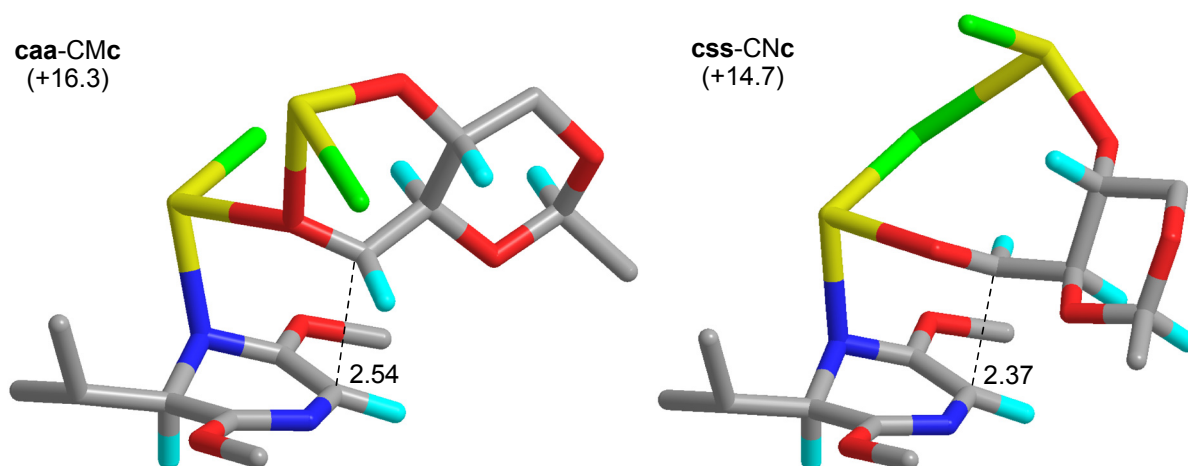

**Table S1.** Absolute energies (hartrees) and relative free energies (kcal/mol) calculated for most significant intermediate and TSs in the reaction of  $\text{SnCl}^+\mathbf{10}^-$  and **11b**.

| model ( <i>config</i> ) <sup>a</sup> | B3LYP/cc-pVDZ-PP |            |                        | B3LYP(SCRF)/cc-pVTZ-PP |                        |
|--------------------------------------|------------------|------------|------------------------|------------------------|------------------------|
|                                      | $E_{SCF}$        | $N_{imag}$ | $E_{cor}$ <sup>b</sup> | $G$                    | $G_{rel}$ <sup>c</sup> |
| <b>15b</b>                           | -2092.53531729   | 0          | 0.457543               | -2092.971201           | -1.24                  |
| <b>caa-CMb</b>                       | -2092.51363190   | 1          | 0.458570               | -2092.951269           | +11.9                  |
| <b>css-CFb</b>                       | -2092.51365522   | 1          | 0.458572               | -2092.954799           | +9.6                   |
| <b>tas-BNb</b>                       | -2092.53470649   | 1          | 0.459266               | -2092.968294           | <b>0.0</b>             |
| <b>tsa-CMb</b>                       | -2092.53198882   | 1          | 0.458695               | -2092.966689           | +0.65                  |

<sup>a</sup> Legend: **caa**–cis,anti,anti; **css**–cis,syn,syn; **tas**–trans,anti,syn; **tsa**–trans,syn,anti; B–boat-like; C–chair-like; F–Felkin-Anh; M–Cornforth; N–non-Anh.

<sup>b</sup> Zero-point energy corrections with thermal and entropy effects at 195.15 K and 1.0 atm, scaled by 0.97.

<sup>c</sup> With zero-point energy corrections and thermal and entropy effects (calculated at B3LYP/cc-pVDZ-PP level).

**Table S2.** Absolute energies (hartrees) and relative free energies (kcal/mol) calculated for most significant intermediate and TSs in the reaction of  $\text{SnCl}^+\mathbf{10}^-$  and **11c**.

| model ( <i>config</i> ) <sup>a</sup> | B3LYP/cc-pVDZ-PP |            |                        | B3LYP(SCRF)/cc-pVTZ-PP |                        |
|--------------------------------------|------------------|------------|------------------------|------------------------|------------------------|
|                                      | $E_{SCF}$        | $N_{imag}$ | $E_{cor}$ <sup>b</sup> | $G$                    | $G_{rel}$ <sup>c</sup> |
| <b>15c</b>                           | -2496.26419872   | 0          | 0.318559               | -2496.648718           | -8.38                  |
| <b>caa-CMc</b>                       | -2496.22535153   | 1          | 0.321745               | -2496.612589           | +16.3                  |
| <b>css-CNc</b>                       | -2496.22711105   | 1          | 0.323001               | -2496.616406           | +14.7                  |
| <b>tas-BNc</b>                       | -2496.24913566   | 1          | 0.324171               | -2496.633866           | +4.4                   |
| <b>tsa-CMc</b>                       | -2496.25656316   | 1          | 0.322848               | -2496.639644           | <b>0.0</b>             |

<sup>a</sup> Legend: **caa**–cis,anti,anti; **css**–cis,syn,syn; **tas**–trans,anti,syn; **tsa**–trans,syn,anti; B–boat-like; C–chair-like; F–Felkin-Anh; M–Cornforth; N–non-Anh.

<sup>b</sup> Zero-point energy corrections with thermal and entropy effects at 273.15 K and 1.0 atm, scaled by 0.97.

<sup>c</sup> With zero-point energy corrections and thermal and entropy effects (calculated at B3LYP/cc-pVDZ-PP level).

## 4. Cartesian coordinates of reported structures.

### caa-CMb

E(RB+HF-LYP) = -2092.51363190  
 Zero-point correction= 0.495398 (Hartree/Particle)  
 Thermal correction to Energy= 0.512026  
 Thermal correction to Enthalpy= 0.512644  
 Thermal correction to Gibbs Free Energy= 0.458570  
 Sum of electronic and zero-point Energies= -2092.018234  
 Sum of electronic and thermal Energies= -2092.001606  
 Sum of electronic and thermal Enthalpies= -2092.000988  
 Sum of electronic and thermal Free Energies= -2092.055062

-----  
 Variational PCM results  
 <psi(f)| H |psi(f)> (a.u.) = -2092.969094  
 <psi(f)|H+V(f)/2|psi(f)> (a.u.) = -2092.987302  
 Total free energy in solution:  
 with all non electrostatic terms (a.u.) = -2092.951269  
 -----

| Center<br>Number | Atomic<br>Number | Atomic<br>Type | Coordinates (Angstroms) |           |           |
|------------------|------------------|----------------|-------------------------|-----------|-----------|
|                  |                  |                | X                       | Y         | Z         |
| 1                | 6                | 0              | 2.538246                | 1.599153  | 0.104909  |
| 2                | 6                | 0              | 0.311937                | 1.102812  | 0.882916  |
| 3                | 8                | 0              | 0.178831                | -0.145027 | 0.685688  |
| 4                | 50               | 0              | 0.269290                | -1.493601 | -1.148393 |
| 5                | 7                | 0              | 2.327539                | -0.491660 | -1.062712 |
| 6                | 6                | 0              | 2.259178                | 0.856796  | -1.048240 |
| 7                | 7                | 0              | 3.155909                | 0.995795  | 1.213493  |
| 8                | 6                | 0              | 3.509022                | -0.228295 | 1.098191  |
| 9                | 8                | 0              | 4.130749                | -0.870404 | 2.112823  |
| 10               | 6                | 0              | 3.384523                | -1.052792 | -0.179319 |
| 11               | 8                | 0              | 1.728478                | 1.377083  | -2.173744 |
| 12               | 6                | 0              | -0.646639               | 2.095808  | 0.267943  |
| 13               | 8                | 0              | -0.132353               | 3.409136  | 0.500243  |
| 14               | 6                | 0              | -1.021606               | 4.447287  | 0.101008  |
| 15               | 8                | 0              | -2.242795               | 4.376664  | 0.799598  |
| 16               | 6                | 0              | -2.908090               | 3.146237  | 0.548554  |
| 17               | 6                | 0              | -2.028579               | 1.963454  | 0.969479  |
| 18               | 17               | 0              | -0.991249               | -0.100829 | -2.781959 |
| 19               | 6                | 0              | 4.342669                | -0.113104 | 3.310409  |
| 20               | 6                | 0              | 1.695653                | 2.794677  | -2.335033 |
| 21               | 6                | 0              | 3.244912                | -2.590557 | 0.010150  |
| 22               | 6                | 0              | 4.618671                | -3.268484 | 0.125347  |
| 23               | 6                | 0              | 2.328693                | -3.030514 | 1.168290  |
| 24               | 6                | 0              | -0.364977               | 5.770964  | 0.419799  |
| 25               | 8                | 0              | -2.657210               | 0.758211  | 0.581272  |
| 26               | 6                | 0              | -3.800984               | -1.290730 | 1.107372  |
| 27               | 6                | 0              | -4.364476               | -2.208295 | 2.007591  |
| 28               | 6                | 0              | -3.916806               | -1.525670 | -0.268353 |
| 29               | 6                | 0              | -5.031346               | -3.342590 | 1.542418  |
| 30               | 6                | 0              | -4.585631               | -2.664687 | -0.732779 |
| 31               | 6                | 0              | -5.144339               | -3.574904 | 0.166756  |
| 32               | 6                | 0              | -3.079269               | -0.076768 | 1.649018  |
| 33               | 1                | 0              | -3.752183               | 0.480460  | 2.331825  |
| 34               | 1                | 0              | -5.465939               | -4.047380 | 2.255417  |
| 35               | 1                | 0              | -4.667252               | -2.836629 | -1.808731 |
| 36               | 1                | 0              | -5.666520               | -4.462023 | -0.199092 |
| 37               | 1                | 0              | -1.223697               | 4.334336  | -0.987911 |
| 38               | 1                | 0              | 0.580113                | 5.874625  | -0.132045 |
| 39               | 1                | 0              | 2.552108                | 2.687191  | 0.102800  |
| 40               | 1                | 0              | 1.215593                | 2.965884  | -3.306500 |
| 41               | 1                | 0              | 1.116477                | 3.283334  | -1.538173 |
| 42               | 1                | 0              | 2.719604                | 3.206508  | -2.347580 |
| 43               | 1                | 0              | 2.799752                | -2.939389 | -0.939937 |
| 44               | 1                | 0              | 4.871295                | -0.787929 | 3.995602  |
| 45               | 1                | 0              | 3.383108                | 0.207589  | 3.744306  |
| 46               | 1                | 0              | 4.944892                | 0.784278  | 3.102228  |
| 47               | 1                | 0              | 4.502723                | -4.359884 | 0.224871  |
| 48               | 1                | 0              | 5.162180                | -2.901148 | 1.008900  |
| 49               | 1                | 0              | 5.238697                | -3.076629 | -0.765516 |
| 50               | 1                | 0              | 1.981778                | -4.064314 | 1.010017  |
| 51               | 1                | 0              | 1.442307                | -2.387359 | 1.281484  |
| 52               | 1                | 0              | 2.868196                | -2.991615 | 2.125120  |
| 53               | 1                | 0              | 4.344493                | -0.907700 | -0.718846 |
| 54               | 1                | 0              | 0.786731                | 1.427692  | 1.824212  |
| 55               | 1                | 0              | -0.789439               | 1.892423  | -0.809082 |
| 56               | 1                | 0              | -3.158824               | 3.039441  | -0.525410 |
| 57               | 1                | 0              | -3.844343               | 3.159890  | 1.124478  |
| 58               | 1                | 0              | -0.158141               | 5.824202  | 1.498811  |
| 59               | 1                | 0              | -1.037063               | 6.595315  | 0.142396  |
| 60               | 1                | 0              | -1.868683               | 2.007806  | 2.061931  |
| 61               | 1                | 0              | -4.281192               | -2.033121 | 3.084647  |
| 62               | 1                | 0              | -3.482270               | -0.815374 | -0.971582 |
| 63               | 1                | 0              | -2.202069               | -0.399369 | 2.243220  |

## css-CFb

E(RB+HF-LYP) = -2092.51365522  
 Zero-point correction= 0.495898 (Hartree/Particle)  
 Thermal correction to Energy= 0.512513  
 Thermal correction to Enthalpy= 0.513131  
 Thermal correction to Gibbs Free Energy= 0.458572  
 Sum of electronic and zero-point Energies= -2092.017758  
 Sum of electronic and thermal Energies= -2092.001142  
 Sum of electronic and thermal Enthalpies= -2092.000524  
 Sum of electronic and thermal Free Energies= -2092.055083

Variational PCM results  
 <psi(f)| H |psi(f)> (a.u.) = -2092.970168  
 <psi(f)|H+V(f)/2|psi(f)> (a.u.) = -2092.989822  
 Total free energy in solution:  
 with all non electrostatic terms (a.u.) = -2092.954799

| Center Number | Atomic Number | Atomic Type | Coordinates (Angstroms) |           |           |
|---------------|---------------|-------------|-------------------------|-----------|-----------|
|               |               |             | X                       | Y         | Z         |
| 1             | 6             | 0           | -0.754990               | 0.046904  | 1.926327  |
| 2             | 6             | 0           | 0.147547                | 0.581313  | -0.221214 |
| 3             | 8             | 0           | -0.846396               | 0.413529  | -0.987938 |
| 4             | 50            | 0           | -1.601851               | -1.633346 | -1.522679 |
| 5             | 7             | 0           | -2.009504               | -1.616865 | 0.730608  |
| 6             | 6             | 0           | -0.905954               | -1.255872 | 1.433184  |
| 7             | 7             | 0           | -1.795253               | 0.976563  | 1.839186  |
| 8             | 6             | 0           | -2.935241               | 0.544421  | 1.441984  |
| 9             | 8             | 0           | -3.969736               | 1.388541  | 1.245766  |
| 10            | 6             | 0           | -3.227421               | -0.942192 | 1.265226  |
| 11            | 8             | 0           | 0.071542                | -2.185560 | 1.430556  |
| 12            | 6             | 0           | 0.669830                | 1.977664  | 0.055060  |
| 13            | 8             | 0           | -0.221806               | 2.957114  | -0.446780 |
| 14            | 6             | 0           | 0.276609                | 4.273888  | -0.269574 |
| 15            | 8             | 0           | 1.495800                | 4.461644  | -0.961582 |
| 16            | 6             | 0           | 2.505486                | 3.577528  | -0.495998 |
| 17            | 6             | 0           | 2.046718                | 2.120850  | -0.637933 |
| 18            | 17            | 0           | 0.727834                | -2.519331 | -1.670057 |
| 19            | 6             | 0           | -3.664546               | 2.785773  | 1.369475  |
| 20            | 6             | 0           | 1.300690                | -1.897704 | 2.098609  |
| 21            | 6             | 0           | -4.536355               | -1.367325 | 0.548802  |
| 22            | 6             | 0           | -5.719914               | -1.310205 | 1.529973  |
| 23            | 6             | 0           | -4.905919               | -0.619297 | -0.743848 |
| 24            | 6             | 0           | -0.737104               | 5.242971  | -0.832795 |
| 25            | 8             | 0           | 2.954402                | 1.230441  | -0.003316 |
| 26            | 6             | 0           | 4.746218                | -0.356623 | -0.116043 |
| 27            | 6             | 0           | 4.558373                | -1.743447 | -0.195758 |
| 28            | 6             | 0           | 5.753960                | 0.147652  | 0.720404  |
| 29            | 6             | 0           | 5.373084                | -2.612372 | 0.538366  |
| 30            | 6             | 0           | 6.564076                | -0.717483 | 1.457946  |
| 31            | 6             | 0           | 6.376491                | -2.101440 | 1.365843  |
| 32            | 6             | 0           | 3.869515                | 0.582387  | -0.903408 |
| 33            | 1             | 0           | 4.485875                | 1.343664  | -1.418307 |
| 34            | 1             | 0           | 0.453676                | 4.441615  | 0.817003  |
| 35            | 1             | 0           | -1.689558               | 5.156750  | -0.291069 |
| 36            | 1             | 0           | 0.064914                | 0.316860  | 2.591819  |
| 37            | 1             | 0           | 1.932689                | -2.780557 | 1.946784  |
| 38            | 1             | 0           | 1.808333                | -1.016174 | 1.675900  |
| 39            | 1             | 0           | 1.131214                | -1.742144 | 3.177802  |
| 40            | 1             | 0           | -4.367261               | -2.429809 | 0.296035  |
| 41            | 1             | 0           | -4.583466               | 3.314138  | 1.084672  |
| 42            | 1             | 0           | -2.826976               | 3.047580  | 0.705766  |
| 43            | 1             | 0           | -3.382269               | 3.030324  | 2.405225  |
| 44            | 1             | 0           | -6.644537               | -1.658626 | 1.042351  |
| 45            | 1             | 0           | -5.889088               | -0.278960 | 1.878116  |
| 46            | 1             | 0           | -5.545315               | -1.946607 | 2.412614  |
| 47            | 1             | 0           | -5.743146               | -1.134635 | -1.242645 |
| 48            | 1             | 0           | -4.082253               | -0.576261 | -1.473439 |
| 49            | 1             | 0           | -5.210463               | 0.414149  | -0.532847 |
| 50            | 1             | 0           | -3.335002               | -1.329897 | 2.299646  |
| 51            | 1             | 0           | 0.902094                | -0.211228 | -0.122772 |
| 52            | 1             | 0           | 0.832754                | 2.113135  | 1.140514  |
| 53            | 1             | 0           | 2.743651                | 3.769043  | 0.570226  |
| 54            | 1             | 0           | 3.406570                | 3.776759  | -1.093862 |
| 55            | 1             | 0           | -0.906122               | 5.016250  | -1.895700 |
| 56            | 1             | 0           | -0.360462               | 6.271439  | -0.739864 |
| 57            | 1             | 0           | 1.923437                | 1.877255  | -1.708616 |
| 58            | 1             | 0           | 3.767217                | -2.145016 | -0.834367 |
| 59            | 1             | 0           | 5.902100                | 1.228278  | 0.792160  |
| 60            | 1             | 0           | 5.221599                | -3.691610 | 0.461675  |
| 61            | 1             | 0           | 7.347637                | -0.313115 | 2.103129  |
| 62            | 1             | 0           | 7.014303                | -2.779561 | 1.937766  |
| 63            | 1             | 0           | 3.303126                | 0.024961  | -1.670756 |

## tas-BNb

E(RB+HF-LYP) = -2092.53470649  
 Zero-point correction= 0.496192 (Hartree/Particle)  
 Thermal correction to Energy= 0.512830  
 Thermal correction to Enthalpy= 0.513448  
 Thermal correction to Gibbs Free Energy= 0.459266  
 Sum of electronic and zero-point Energies= -2092.038514  
 Sum of electronic and thermal Energies= -2092.021876  
 Sum of electronic and thermal Enthalpies= -2092.021258  
 Sum of electronic and thermal Free Energies= -2092.075440

Variational PCM results  
 <psi(f)| H |psi(f)> (a.u.) = -2092.991772  
 <psi(f)|H+V(f)/2|psi(f)> (a.u.) = -2093.008172  
 Total free energy in solution:  
 with all non electrostatic terms (a.u.) = -2092.968294

| Center<br>Number | Atomic<br>Number | Atomic<br>Type | Coordinates (Angstroms) |           |           |
|------------------|------------------|----------------|-------------------------|-----------|-----------|
|                  |                  |                | X                       | Y         | Z         |
| 1                | 6                | 0              | -1.555885               | 1.036352  | 1.640946  |
| 2                | 6                | 0              | 0.112118                | 1.026988  | -0.084650 |
| 3                | 8                | 0              | -0.379237               | 1.209673  | -1.244788 |
| 4                | 50               | 0              | -1.918913               | -0.218409 | -2.126517 |
| 5                | 7                | 0              | -2.589544               | -0.440779 | 0.038570  |
| 6                | 6                | 0              | -2.412531               | 0.782191  | 0.565396  |
| 7                | 7                | 0              | -1.038982               | -0.027445 | 2.400254  |
| 8                | 6                | 0              | -1.379059               | -1.214140 | 2.047386  |
| 9                | 8                | 0              | -0.887689               | -2.303043 | 2.668529  |
| 10               | 6                | 0              | -2.332808               | -1.590900 | 0.924130  |
| 11               | 8                | 0              | -2.951633               | 1.741283  | -0.223304 |
| 12               | 6                | 0              | 1.089717                | 2.027062  | 0.487780  |
| 13               | 8                | 0              | 0.601767                | 3.355397  | 0.315636  |
| 14               | 6                | 0              | 1.498970                | 4.332388  | 0.830792  |
| 15               | 8                | 0              | 2.733404                | 4.296114  | 0.154091  |
| 16               | 6                | 0              | 3.371365                | 3.033640  | 0.295267  |
| 17               | 6                | 0              | 2.472592                | 1.901288  | -0.210376 |
| 18               | 17               | 0              | -0.404257               | -2.200410 | -1.941162 |
| 19               | 6                | 0              | 0.068886                | -2.074334 | 3.710347  |
| 20               | 6                | 0              | -2.716698               | 3.124598  | 0.081191  |
| 21               | 6                | 0              | -3.646849               | -2.231833 | 1.464213  |
| 22               | 6                | 0              | -4.471494               | -1.267556 | 2.324633  |
| 23               | 6                | 0              | -4.478946               | -2.804898 | 0.311898  |
| 24               | 6                | 0              | 0.882309                | 5.697009  | 0.626889  |
| 25               | 8                | 0              | 3.095829                | 0.672704  | 0.119061  |
| 26               | 6                | 0              | 3.928249                | -1.498075 | -0.482344 |
| 27               | 6                | 0              | 5.117976                | -1.343446 | 0.245190  |
| 28               | 6                | 0              | 3.494500                | -2.788930 | -0.813192 |
| 29               | 6                | 0              | 5.865246                | -2.460124 | 0.624914  |
| 30               | 6                | 0              | 4.248130                | -3.906840 | -0.440565 |
| 31               | 6                | 0              | 5.434994                | -3.745934 | 0.278746  |
| 32               | 1                | 0              | 1.670537                | 4.112034  | 1.908837  |
| 33               | 1                | 0              | -0.075632               | 5.767576  | 1.161709  |
| 34               | 1                | 0              | -1.493615               | 2.020747  | 2.102196  |
| 35               | 1                | 0              | -3.256533               | 3.685408  | -0.692110 |
| 36               | 1                | 0              | -3.136089               | 3.372607  | 1.069886  |
| 37               | 1                | 0              | -1.643987               | 3.360589  | 0.046227  |
| 38               | 1                | 0              | -3.314678               | -3.069921 | 2.101951  |
| 39               | 1                | 0              | 0.336651                | -3.069202 | 4.087398  |
| 40               | 1                | 0              | -0.365389               | -1.456757 | 4.511325  |
| 41               | 1                | 0              | 0.957347                | -1.558992 | 3.313756  |
| 42               | 1                | 0              | -5.338964               | -1.786670 | 2.763673  |
| 43               | 1                | 0              | -4.857282               | -0.428081 | 1.722876  |
| 44               | 1                | 0              | -3.879017               | -0.848266 | 3.154225  |
| 45               | 1                | 0              | -5.376978               | -3.316818 | 0.693847  |
| 46               | 1                | 0              | -3.900569               | -3.532957 | -0.280303 |
| 47               | 1                | 0              | -4.812588               | -2.002599 | -0.366404 |
| 48               | 1                | 0              | -1.819001               | -2.368023 | 0.334962  |
| 49               | 1                | 0              | 0.224301                | 0.003949  | 0.310108  |
| 50               | 1                | 0              | 1.230848                | 1.792367  | 1.560207  |
| 51               | 1                | 0              | 3.629613                | 2.835358  | 1.355248  |
| 52               | 1                | 0              | 4.303219                | 3.075552  | -0.285894 |
| 53               | 1                | 0              | 0.712126                | 5.863890  | -0.446981 |
| 54               | 1                | 0              | 1.563714                | 6.472165  | 1.005083  |
| 55               | 1                | 0              | 2.317924                | 2.010422  | -1.297843 |
| 56               | 1                | 0              | 5.447248                | -0.340302 | 0.522134  |
| 57               | 1                | 0              | 2.557316                | -2.919120 | -1.360232 |
| 58               | 1                | 0              | 6.788988                | -2.327332 | 1.193579  |
| 59               | 1                | 0              | 3.898703                | -4.907381 | -0.706168 |
| 60               | 1                | 0              | 6.021441                | -4.619248 | 0.574124  |
| 61               | 6                | 0              | 3.139790                | -0.293839 | -0.937540 |
| 62               | 1                | 0              | 2.123028                | -0.600787 | -1.238341 |
| 63               | 1                | 0              | 3.622085                | 0.163772  | -1.825329 |



## tsa-CMb

E(RB+HF-LYP) = -2092.53198882  
 Zero-point correction= 0.495771 (Hartree/Particle)  
 Thermal correction to Energy= 0.512392  
 Thermal correction to Enthalpy= 0.513010  
 Thermal correction to Gibbs Free Energy= 0.458695  
 Sum of electronic and zero-point Energies= -2092.036218  
 Sum of electronic and thermal Energies= -2092.019597  
 Sum of electronic and thermal Enthalpies= -2092.018979  
 Sum of electronic and thermal Free Energies= -2092.073294

-----  
 Variational PCM results  
 <psi(f)| H |psi(f)> (a.u.) = -2092.988873  
 <psi(f)|H+V(f)/2|psi(f)> (a.u.) = -2093.006213  
 Total free energy in solution:  
 with all non electrostatic terms (a.u.) = -2092.966689  
 -----

| Center<br>Number | Atomic<br>Number | Atomic<br>Type | Coordinates (Angstroms) |           |           |
|------------------|------------------|----------------|-------------------------|-----------|-----------|
|                  |                  |                | X                       | Y         | Z         |
| 1                | 6                | 0              | -1.691964               | 1.286741  | 1.181240  |
| 2                | 6                | 0              | 0.071896                | 1.220167  | -0.532225 |
| 3                | 8                | 0              | 0.242904                | -0.028756 | -0.672758 |
| 4                | 50               | 0              | -1.256140               | -1.364216 | -1.745586 |
| 5                | 7                | 0              | -2.499442               | -0.647324 | -0.004434 |
| 6                | 6                | 0              | -2.489558               | 0.693183  | 0.200579  |
| 7                | 7                | 0              | -0.982685               | 0.507892  | 2.105512  |
| 8                | 6                | 0              | -1.179905               | -0.758824 | 2.068247  |
| 9                | 8                | 0              | -0.490748               | -1.616425 | 2.848303  |
| 10               | 6                | 0              | -2.197145               | -1.460655 | 1.189800  |
| 11               | 8                | 0              | -3.198910               | 1.377190  | -0.720059 |
| 12               | 6                | 0              | 1.025715                | 2.039800  | 0.300255  |
| 13               | 8                | 0              | 0.553401                | 3.386149  | 0.223962  |
| 14               | 6                | 0              | 1.389421                | 4.313953  | 0.899144  |
| 15               | 8                | 0              | 2.684571                | 4.327064  | 0.341364  |
| 16               | 6                | 0              | 3.307958                | 3.056710  | 0.465447  |
| 17               | 6                | 0              | 2.484594                | 1.956197  | -0.218966 |
| 18               | 17               | 0              | -1.689664               | 0.367131  | -3.447196 |
| 19               | 6                | 0              | 0.504668                | -1.045967 | 3.708745  |
| 20               | 6                | 0              | -3.192450               | 2.803669  | -0.673637 |
| 21               | 6                | 0              | -3.469251               | -1.901022 | 1.977390  |
| 22               | 6                | 0              | -4.272952               | -0.725716 | 2.546868  |
| 23               | 6                | 0              | -4.348722               | -2.801782 | 1.102401  |
| 24               | 6                | 0              | 0.786822                | 5.691185  | 0.744499  |
| 25               | 8                | 0              | 3.032372                | 0.701041  | 0.142210  |
| 26               | 6                | 0              | 3.882435                | -1.463052 | -0.412763 |
| 27               | 6                | 0              | 2.927001                | -2.179897 | 0.325904  |
| 28               | 6                | 0              | 5.122059                | -2.057415 | -0.677046 |
| 29               | 6                | 0              | 3.209782                | -3.468309 | 0.782594  |
| 30               | 6                | 0              | 5.403685                | -3.351655 | -0.225930 |
| 31               | 6                | 0              | 4.448124                | -4.059871 | 0.506048  |
| 32               | 6                | 0              | 3.557286                | -0.082389 | -0.929861 |
| 33               | 1                | 0              | 2.804984                | -0.149727 | -1.738043 |
| 34               | 1                | 0              | 4.464772                | 0.389653  | -1.352400 |
| 35               | 1                | 0              | 1.460740                | 4.009337  | 1.967474  |
| 36               | 1                | 0              | -0.219905               | 5.718343  | 1.185127  |
| 37               | 1                | 0              | -1.747674               | 2.349505  | 1.406126  |
| 38               | 1                | 0              | -3.763431               | 3.128942  | -1.551676 |
| 39               | 1                | 0              | -3.683256               | 3.168070  | 0.245211  |
| 40               | 1                | 0              | -2.170032               | 3.211219  | -0.724038 |
| 41               | 1                | 0              | -3.087238               | -2.500710 | 2.823701  |
| 42               | 1                | 0              | 0.894617                | -1.882336 | 4.302425  |
| 43               | 1                | 0              | 0.063354                | -0.276964 | 4.360251  |
| 44               | 1                | 0              | 1.311772                | -0.588732 | 3.115022  |
| 45               | 1                | 0              | -5.100489               | -1.099108 | 3.171944  |
| 46               | 1                | 0              | -4.715158               | -0.118139 | 1.740779  |
| 47               | 1                | 0              | -3.651447               | -0.066114 | 3.172696  |
| 48               | 1                | 0              | -5.230945               | -3.151478 | 1.662097  |
| 49               | 1                | 0              | -3.796922               | -3.691677 | 0.755669  |
| 50               | 1                | 0              | -4.701720               | -2.253981 | 0.214317  |
| 51               | 1                | 0              | -1.721141               | -2.400367 | 0.853703  |
| 52               | 1                | 0              | -0.510947               | 1.781302  | -1.281775 |
| 53               | 1                | 0              | 1.021129                | 1.663334  | 1.340438  |
| 54               | 1                | 0              | 3.434484                | 2.780699  | 1.531610  |
| 55               | 1                | 0              | 4.304809                | 3.138322  | 0.009391  |
| 56               | 1                | 0              | 0.720783                | 5.942277  | -0.324507 |
| 57               | 1                | 0              | 1.421528                | 6.434196  | 1.247823  |
| 58               | 1                | 0              | 2.495768                | 2.113928  | -1.311859 |
| 59               | 1                | 0              | 1.963599                | -1.713642 | 0.538582  |
| 60               | 1                | 0              | 5.877690                | -1.503587 | -1.241202 |
| 61               | 1                | 0              | 2.458358                | -4.016014 | 1.356796  |
| 62               | 1                | 0              | 6.375281                | -3.802478 | -0.441409 |
| 63               | 1                | 0              | 4.667106                | -5.068885 | 0.863218  |

## caa-CMc

E(RB+HF-LYP) = -2496.22535153  
 Zero-point correction= 0.380007 (Hartree/Particle)  
 Thermal correction to Energy= 0.407694  
 Thermal correction to Enthalpy= 0.408559  
 Thermal correction to Gibbs Free Energy= 0.321745  
 Sum of electronic and zero-point Energies= -2495.845345  
 Sum of electronic and thermal Energies= -2495.817657  
 Sum of electronic and thermal Enthalpies= -2495.816792  
 Sum of electronic and thermal Free Energies= -2495.903606

### Variational PCM results

<psi(f)| H |psi(f)> (a.u.) = -2496.627799  
 <psi(f)|H+V(f)/2|psi(f)> (a.u.) = -2496.649001  
 Total free energy in solution:  
 with all non electrostatic terms (a.u.) = -2496.612589

| Center<br>Number | Atomic<br>Number | Atomic<br>Type | Coordinates (Angstroms) |           |           |
|------------------|------------------|----------------|-------------------------|-----------|-----------|
|                  |                  |                | X                       | Y         | Z         |
| 1                | 6                | 0              | 0.744268                | 1.802448  | 1.896172  |
| 2                | 6                | 0              | -0.838709               | 0.192516  | 0.732600  |
| 3                | 8                | 0              | -0.078572               | -0.473429 | -0.069132 |
| 4                | 50               | 0              | 1.518748                | 0.211390  | -1.726064 |
| 5                | 7                | 0              | 2.227109                | 1.345168  | 0.061446  |
| 6                | 6                | 0              | 1.267590                | 2.123757  | 0.641385  |
| 7                | 7                | 0              | 1.235459                | 0.718709  | 2.634172  |
| 8                | 6                | 0              | 2.328474                | 0.187072  | 2.221273  |
| 9                | 8                | 0              | 2.858400                | -0.896625 | 2.813825  |
| 10               | 6                | 0              | 3.152002                | 0.795471  | 1.091811  |
| 11               | 8                | 0              | 0.824963                | 3.112360  | -0.154338 |
| 12               | 6                | 0              | -2.083001               | 0.814210  | 0.199755  |
| 13               | 8                | 0              | -2.605760               | 1.757663  | 1.124682  |
| 14               | 6                | 0              | -3.880865               | 2.265251  | 0.722446  |
| 15               | 8                | 0              | -4.836585               | 1.240202  | 0.631664  |
| 16               | 6                | 0              | -4.465444               | 0.253199  | -0.324370 |
| 17               | 6                | 0              | -3.118548               | -0.380513 | 0.046304  |
| 18               | 17               | 0              | 0.007265                | 1.785278  | -2.878480 |
| 19               | 6                | 0              | 2.093885                | -1.482479 | 3.881920  |
| 20               | 6                | 0              | -0.190423               | 3.992882  | 0.331981  |
| 21               | 6                | 0              | 4.343849                | -0.049860 | 0.588219  |
| 22               | 6                | 0              | 4.021209                | -1.439356 | 0.015639  |
| 23               | 6                | 0              | 5.228957                | 0.757755  | -0.371651 |
| 24               | 6                | 0              | -4.338731               | 3.254997  | 1.768845  |
| 25               | 8                | 0              | -2.732936               | -1.279415 | -0.941974 |
| 26               | 17               | 0              | -1.394671               | -3.235310 | 1.554511  |
| 27               | 50               | 0              | -1.162918               | -2.589251 | -0.821659 |
| 28               | 1                | 0              | -5.330440               | 3.644562  | 1.498839  |
| 29               | 1                | 0              | -3.219102               | -0.848613 | 1.044249  |
| 30               | 1                | 0              | -3.758638               | 2.740109  | -0.276682 |
| 31               | 1                | 0              | -3.631575               | 4.093437  | 1.844511  |
| 32               | 1                | 0              | 0.028370                | 2.443355  | 2.407241  |
| 33               | 1                | 0              | -0.426315               | 4.657676  | -0.507845 |
| 34               | 1                | 0              | -1.088374               | 3.438776  | 0.643110  |
| 35               | 1                | 0              | 0.190994                | 4.586963  | 1.180310  |
| 36               | 1                | 0              | 4.927751                | -0.225933 | 1.507854  |
| 37               | 1                | 0              | 2.704707                | -2.314006 | 4.254516  |
| 38               | 1                | 0              | 1.127111                | -1.849481 | 3.504819  |
| 39               | 1                | 0              | 1.910311                | -0.743489 | 4.675596  |
| 40               | 1                | 0              | 4.943233                | -2.041615 | -0.032945 |
| 41               | 1                | 0              | 3.630945                | -1.391434 | -1.014332 |
| 42               | 1                | 0              | 3.300306                | -1.984640 | 0.640271  |
| 43               | 1                | 0              | 6.139576                | 0.191623  | -0.624120 |
| 44               | 1                | 0              | 5.538377                | 1.717139  | 0.073177  |
| 45               | 1                | 0              | 4.708972                | 0.988065  | -1.315801 |
| 46               | 1                | 0              | 3.628733                | 1.687090  | 1.552709  |
| 47               | 1                | 0              | -0.819911               | -0.078767 | 1.796912  |
| 48               | 1                | 0              | -1.917083               | 1.251531  | -0.801628 |
| 49               | 1                | 0              | -4.396136               | 0.686711  | -1.341811 |
| 50               | 1                | 0              | -5.252691               | -0.513083 | -0.320194 |
| 51               | 1                | 0              | -4.405853               | 2.750290  | 2.743802  |

css-CNc

E(RB+HF-LYP) = -2496.22711105  
 Zero-point correction= 0.380531 (Hartree/Particle)  
 Thermal correction to Energy= 0.408022  
 Thermal correction to Enthalpy= 0.408887  
 Thermal correction to Gibbs Free Energy= 0.323001  
 Sum of electronic and zero-point Energies= -2495.846580  
 Sum of electronic and thermal Energies= -2495.819089  
 Sum of electronic and thermal Enthalpies= -2495.818224  
 Sum of electronic and thermal Free Energies= -2495.904110

-----  
 Variational PCM results  
 =====

<psi(f)| H |psi(f)> (a.u.) = -2496.631070  
 <psi(f)|H+V(f)/2|psi(f)> (a.u.) = -2496.651855  
 Total free energy in solution:  
 with all non electrostatic terms (a.u.) = -2496.616406  
 -----

| Center<br>Number | Atomic<br>Number | Atomic<br>Type | Coordinates (Angstroms) |           |           |
|------------------|------------------|----------------|-------------------------|-----------|-----------|
|                  |                  |                | X                       | Y         | Z         |
| 1                | 6                | 0              | -1.739330               | 1.026574  | 1.929612  |
| 2                | 6                | 0              | 0.191033                | 0.677196  | 0.599750  |
| 3                | 8                | 0              | -0.327245               | 0.326944  | -0.514403 |
| 4                | 50               | 0              | -1.094349               | -1.704757 | -0.778991 |
| 5                | 7                | 0              | -2.572979               | -0.945281 | 0.819050  |
| 6                | 6                | 0              | -1.896137               | -0.370316 | 1.845564  |
| 7                | 7                | 0              | -2.384939               | 1.874177  | 1.027762  |
| 8                | 6                | 0              | -3.243198               | 1.340045  | 0.239398  |
| 9                | 8                | 0              | -3.825844               | 2.042798  | -0.749890 |
| 10               | 6                | 0              | -3.729230               | -0.091313 | 0.423494  |
| 11               | 8                | 0              | -1.235524               | -1.262500 | 2.617876  |
| 12               | 6                | 0              | 0.993756                | 1.940755  | 0.692223  |
| 13               | 8                | 0              | 0.415714                | 3.038421  | 0.013898  |
| 14               | 6                | 0              | 1.246213                | 4.189478  | 0.106062  |
| 15               | 8                | 0              | 2.501537                | 3.978481  | -0.498628 |
| 16               | 6                | 0              | 3.212601                | 2.895443  | 0.095820  |
| 17               | 6                | 0              | 2.378894                | 1.611306  | 0.042811  |
| 18               | 17               | 0              | 0.925585                | -2.620387 | 0.642713  |
| 19               | 6                | 0              | -3.321096               | 3.375340  | -0.947387 |
| 20               | 6                | 0              | -0.499332               | -0.790401 | 3.745163  |
| 21               | 6                | 0              | -4.652538               | -0.655228 | -0.677163 |
| 22               | 6                | 0              | -4.065526               | -0.742687 | -2.095067 |
| 23               | 6                | 0              | -5.258478               | -1.997491 | -0.244746 |
| 24               | 6                | 0              | 0.558439                | 5.328141  | -0.611169 |
| 25               | 8                | 0              | 3.025386                | 0.567020  | 0.725646  |
| 26               | 17               | 0              | 2.888694                | -1.034211 | -2.294028 |
| 27               | 50               | 0              | 3.495114                | -1.337917 | 0.084846  |
| 28               | 1                | 0              | 2.173252                | 1.372004  | -1.016091 |
| 29               | 1                | 0              | 1.399840                | 4.416964  | 1.186267  |
| 30               | 1                | 0              | -0.422519               | 5.524609  | -0.155709 |
| 31               | 1                | 0              | -1.321054               | 1.507482  | 2.814023  |
| 32               | 1                | 0              | -0.085537               | -1.686273 | 4.223514  |
| 33               | 1                | 0              | 0.327417                | -0.123465 | 3.450358  |
| 34               | 1                | 0              | -1.160960               | -0.261221 | 4.451288  |
| 35               | 1                | 0              | -5.469366               | 0.085150  | -0.727243 |
| 36               | 1                | 0              | -3.812167               | 3.742927  | -1.857215 |
| 37               | 1                | 0              | -2.227128               | 3.353060  | -1.057432 |
| 38               | 1                | 0              | -3.574268               | 4.013176  | -0.086461 |
| 39               | 1                | 0              | -4.880371               | -0.852111 | -2.829492 |
| 40               | 1                | 0              | -3.419920               | -1.627495 | -2.229746 |
| 41               | 1                | 0              | -3.498323               | 0.159594  | -2.365392 |
| 42               | 1                | 0              | -5.983108               | -2.356253 | -0.992978 |
| 43               | 1                | 0              | -5.783388               | -1.910724 | 0.720307  |
| 44               | 1                | 0              | -4.481144               | -2.769373 | -0.126837 |
| 45               | 1                | 0              | -4.376370               | -0.049878 | 1.325112  |
| 46               | 1                | 0              | 0.553400                | -0.097843 | 1.285525  |
| 47               | 1                | 0              | 1.161161                | 2.177906  | 1.762427  |
| 48               | 1                | 0              | 3.473797                | 3.120690  | 1.150336  |
| 49               | 1                | 0              | 4.143889                | 2.773175  | -0.475636 |
| 50               | 1                | 0              | 0.422134                | 5.062024  | -1.669924 |
| 51               | 1                | 0              | 1.176546                | 6.235088  | -0.549254 |

## tas-BNc

E(RB+HF-LYP) = -2496.24913566  
 Zero-point correction= 0.381274 (Hartree/Particle)  
 Thermal correction to Energy= 0.408651  
 Thermal correction to Enthalpy= 0.409516  
 Thermal correction to Gibbs Free Energy= 0.324171  
 Sum of electronic and zero-point Energies= -2495.867862  
 Sum of electronic and thermal Energies= -2495.840485  
 Sum of electronic and thermal Enthalpies= -2495.839620  
 Sum of electronic and thermal Free Energies= -2495.924965

### Variational PCM results

<psi(f)| H |psi(f)> (a.u.) = -2496.653303  
 <psi(f)|H+V(f)/2|psi(f)> (a.u.) = -2496.672727  
 Total free energy in solution:  
 with all non electrostatic terms (a.u.) = -2496.633866

| Center Number | Atomic Number | Atomic Type | Coordinates (Angstroms) |           |           |
|---------------|---------------|-------------|-------------------------|-----------|-----------|
|               |               |             | X                       | Y         | Z         |
| 1             | 6             | 0           | -1.703166               | 2.064272  | 0.455976  |
| 2             | 6             | 0           | 0.263953                | 0.900901  | 0.002206  |
| 3             | 8             | 0           | 0.318580                | 0.482678  | -1.211425 |
| 4             | 50            | 0           | -1.096823               | -1.067707 | -1.879254 |
| 5             | 7             | 0           | -2.589599               | 0.062474  | -0.563630 |
| 6             | 6             | 0           | -2.170790               | 1.336888  | -0.647977 |
| 7             | 7             | 0           | -1.941465               | 1.592363  | 1.759761  |
| 8             | 6             | 0           | -2.563183               | 0.475558  | 1.872126  |
| 9             | 8             | 0           | -2.789453               | -0.088251 | 3.073188  |
| 10            | 6             | 0           | -3.124966               | -0.372506 | 0.740029  |
| 11            | 8             | 0           | -1.992928               | 1.715653  | -1.932232 |
| 12            | 6             | 0           | 1.356504                | 1.801098  | 0.506794  |
| 13            | 8             | 0           | 1.513132                | 2.962967  | -0.302178 |
| 14            | 6             | 0           | 2.587440                | 3.776305  | 0.167049  |
| 15            | 8             | 0           | 3.814127                | 3.089253  | 0.133453  |
| 16            | 6             | 0           | 3.801065                | 1.912887  | 0.942204  |
| 17            | 6             | 0           | 2.675978                | 0.978476  | 0.490906  |
| 18            | 17            | 0           | -0.310393               | -2.537267 | 0.122157  |
| 19            | 6             | 0           | -2.280126               | 0.608133  | 4.217991  |
| 20            | 6             | 0           | -1.340276               | 2.967452  | -2.214804 |
| 21            | 6             | 0           | -4.683177               | -0.408203 | 0.760180  |
| 22            | 6             | 0           | -5.311079               | 0.970063  | 0.522826  |
| 23            | 6             | 0           | -5.212266               | -1.443029 | -0.238647 |
| 24            | 6             | 0           | 2.692743                | 4.984135  | -0.735670 |
| 25            | 8             | 0           | 2.566315                | -0.134840 | 1.343488  |
| 26            | 17            | 0           | 3.281041                | -1.989873 | -1.440950 |
| 27            | 50            | 0           | 2.551996                | -2.145303 | 0.912398  |
| 28            | 1             | 0           | 2.859329                | 0.698407  | -0.561729 |
| 29            | 1             | 0           | 2.360478                | 4.064075  | 1.218961  |
| 30            | 1             | 0           | 1.750217                | 5.550254  | -0.727848 |
| 31            | 1             | 0           | -1.446145               | 3.119508  | 0.377631  |
| 32            | 1             | 0           | -1.287734               | 3.023256  | -3.308912 |
| 33            | 1             | 0           | -1.949231               | 3.802761  | -1.833971 |
| 34            | 1             | 0           | -0.330536               | 2.994948  | -1.781379 |
| 35            | 1             | 0           | -4.949101               | -0.741521 | 1.778667  |
| 36            | 1             | 0           | -2.571830               | 0.001930  | 5.084565  |
| 37            | 1             | 0           | -2.712399               | 1.618094  | 4.284352  |
| 38            | 1             | 0           | -1.184748               | 0.701335  | 4.159792  |
| 39            | 1             | 0           | -6.405500               | 0.920519  | 0.641338  |
| 40            | 1             | 0           | -5.103901               | 1.330471  | -0.498154 |
| 41            | 1             | 0           | -4.932539               | 1.722530  | 1.233736  |
| 42            | 1             | 0           | -6.310800               | -1.510714 | -0.186829 |
| 43            | 1             | 0           | -4.804036               | -2.446881 | -0.034757 |
| 44            | 1             | 0           | -4.940853               | -1.166743 | -1.270568 |
| 45            | 1             | 0           | -2.780630               | -1.402227 | 0.930202  |
| 46            | 1             | 0           | -0.157147               | 0.242173  | 0.775315  |
| 47            | 1             | 0           | 1.118390                | 2.082008  | 1.551120  |
| 48            | 1             | 0           | 3.666401                | 2.168824  | 2.012908  |
| 49            | 1             | 0           | 4.781214                | 1.431166  | 0.817295  |
| 50            | 1             | 0           | 2.910356                | 4.653831  | -1.762223 |
| 51            | 1             | 0           | 3.508409                | 5.635748  | -0.391626 |

## tsa-CMc

E(RB+HF-LYP) = -2496.25656316  
 Zero-point correction= 0.380471 (Hartree/Particle)  
 Thermal correction to Energy= 0.408041  
 Thermal correction to Enthalpy= 0.408906  
 Thermal correction to Gibbs Free Energy= 0.322848  
 Sum of electronic and zero-point Energies= -2495.876092  
 Sum of electronic and thermal Energies= -2495.848522  
 Sum of electronic and thermal Enthalpies= -2495.847657  
 Sum of electronic and thermal Free Energies= -2495.933715

### Variational PCM results

<psi(f)| H |psi(f)> (a.u.) = -2496.659184  
 <psi(f)|H+V(f)/2|psi(f)> (a.u.) = -2496.678287  
 Total free energy in solution:  
 with all non electrostatic terms (a.u.) = -2496.639644

| Center Number | Atomic Number | Atomic Type | Coordinates (Angstroms) |           |           |
|---------------|---------------|-------------|-------------------------|-----------|-----------|
|               |               |             | X                       | Y         | Z         |
| 1             | 6             | 0           | -0.517066               | 2.369584  | -0.221438 |
| 2             | 6             | 0           | 0.904433                | 0.602459  | -0.604336 |
| 3             | 8             | 0           | 0.262073                | -0.436905 | -0.133627 |
| 4             | 50            | 0           | -1.493860               | -1.275554 | -1.422399 |
| 5             | 7             | 0           | -2.265841               | 0.749168  | -0.583900 |
| 6             | 6             | 0           | -1.419007               | 1.663188  | -1.052325 |
| 7             | 7             | 0           | -0.644292               | 2.308370  | 1.172147  |
| 8             | 6             | 0           | -1.609960               | 1.600249  | 1.635648  |
| 9             | 8             | 0           | -1.787688               | 1.429939  | 2.956326  |
| 10            | 6             | 0           | -2.677695               | 0.895942  | 0.824258  |
| 11            | 8             | 0           | -1.310812               | 1.643068  | -2.408708 |
| 12            | 6             | 0           | 2.120126                | 1.127776  | 0.101141  |
| 13            | 8             | 0           | 2.557306                | 2.259270  | -0.652044 |
| 14            | 6             | 0           | 3.778706                | 2.805683  | -0.162388 |
| 15            | 8             | 0           | 4.818667                | 1.862405  | -0.217340 |
| 16            | 6             | 0           | 4.534716                | 0.726658  | 0.594270  |
| 17            | 6             | 0           | 3.235249                | 0.038348  | 0.155935  |
| 18            | 17            | 0           | -2.212136               | -2.561842 | 0.575119  |
| 19            | 6             | 0           | -0.839946               | 2.062077  | 3.826562  |
| 20            | 6             | 0           | -0.499050               | 2.635954  | -3.051339 |
| 21            | 6             | 0           | -4.069966               | 1.583472  | 0.967789  |
| 22            | 6             | 0           | -4.093325               | 3.024168  | 0.443448  |
| 23            | 6             | 0           | -5.161558               | 0.731277  | 0.310438  |
| 24            | 6             | 0           | 4.148584                | 3.982846  | -1.035435 |
| 25            | 8             | 0           | 2.916266                | -0.952947 | 1.085817  |
| 26            | 17            | 0           | 1.466268                | -3.110241 | -1.306049 |
| 27            | 50            | 0           | 1.341773                | -2.264012 | 1.072411  |
| 28            | 1             | 0           | 3.377182                | -0.363263 | -0.867269 |
| 29            | 1             | 0           | 3.618308                | 3.110362  | 0.896330  |
| 30            | 1             | 0           | 3.355359                | 4.743552  | -1.007496 |
| 31            | 1             | 0           | 0.078810                | 3.197726  | -0.599211 |
| 32            | 1             | 0           | -0.588319               | 2.435791  | -4.126084 |
| 33            | 1             | 0           | -0.880791               | 3.645647  | -2.829840 |
| 34            | 1             | 0           | 0.556735                | 2.567784  | -2.745122 |
| 35            | 1             | 0           | -4.259252               | 1.609144  | 2.055543  |
| 36            | 1             | 0           | -1.184065               | 1.841841  | 4.844589  |
| 37            | 1             | 0           | -0.810462               | 3.147527  | 3.648918  |
| 38            | 1             | 0           | 0.169215                | 1.653094  | 3.663360  |
| 39            | 1             | 0           | -5.064809               | 3.495862  | 0.663041  |
| 40            | 1             | 0           | -3.953440               | 3.055293  | -0.649904 |
| 41            | 1             | 0           | -3.309871               | 3.646114  | 0.906210  |
| 42            | 1             | 0           | -6.155948               | 1.174824  | 0.479650  |
| 43            | 1             | 0           | -5.172301               | -0.293088 | 0.716084  |
| 44            | 1             | 0           | -5.003073               | 0.662645  | -0.777881 |
| 45            | 1             | 0           | -2.783390               | -0.112525 | 1.251380  |
| 46            | 1             | 0           | 0.946662                | 0.715514  | -1.699386 |
| 47            | 1             | 0           | 1.869707                | 1.408416  | 1.142365  |
| 48            | 1             | 0           | 4.436657                | 1.017110  | 1.659806  |
| 49            | 1             | 0           | 5.384414                | 0.037293  | 0.497229  |
| 50            | 1             | 0           | 4.287085                | 3.639645  | -2.071561 |
| 51            | 1             | 0           | 5.088691                | 4.427882  | -0.680006 |

## 5. References.

- (1) M. Svensson, S. Humbel, R. D. J. Froese, T. Matsubara, S. Sieber and K. Morokuma, *J. Phys. Chem.*, 1996, **100**, 19357–19363.
- (2) (a) T. H. Dunning Jr. and P. J. Hay, in *Methods of Electronic Structure Theory, Vol. 2*, H. F. Schaefer III, ed., Plenum Press, 1977; (b) P. J. Hay and W. R. Wadt, *J. Chem. Phys.*, 1982, **82**, 270, 284 and 299.
- (3) (a) M. J. S. Dewar, E. G. Zoebisch, E. F. Healy and J. J. P. Stewart, *J. Am. Chem. Soc.*, 1985, **107**, 3902–3909; (b) M. J. S. Dewar and E. G. Zoebisch, *Tetrahedron Lett.*, 1988, **49**, 1–21; (c) M. J. S. Dewar and C. Jie, *Organometallics*, 1987, **6**, 1486–1490; (d) M. J. S. Dewar, E. F. Healy, D. R. Kuhn and A. J. Holder, *Organometallics*, 1991, **10**, 431–435.

## 6. NMR spectra.

$^1\text{H}$  NMR (300 MHz,  $\text{CDCl}_3$ )

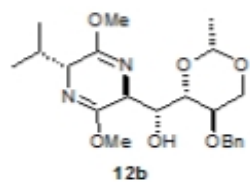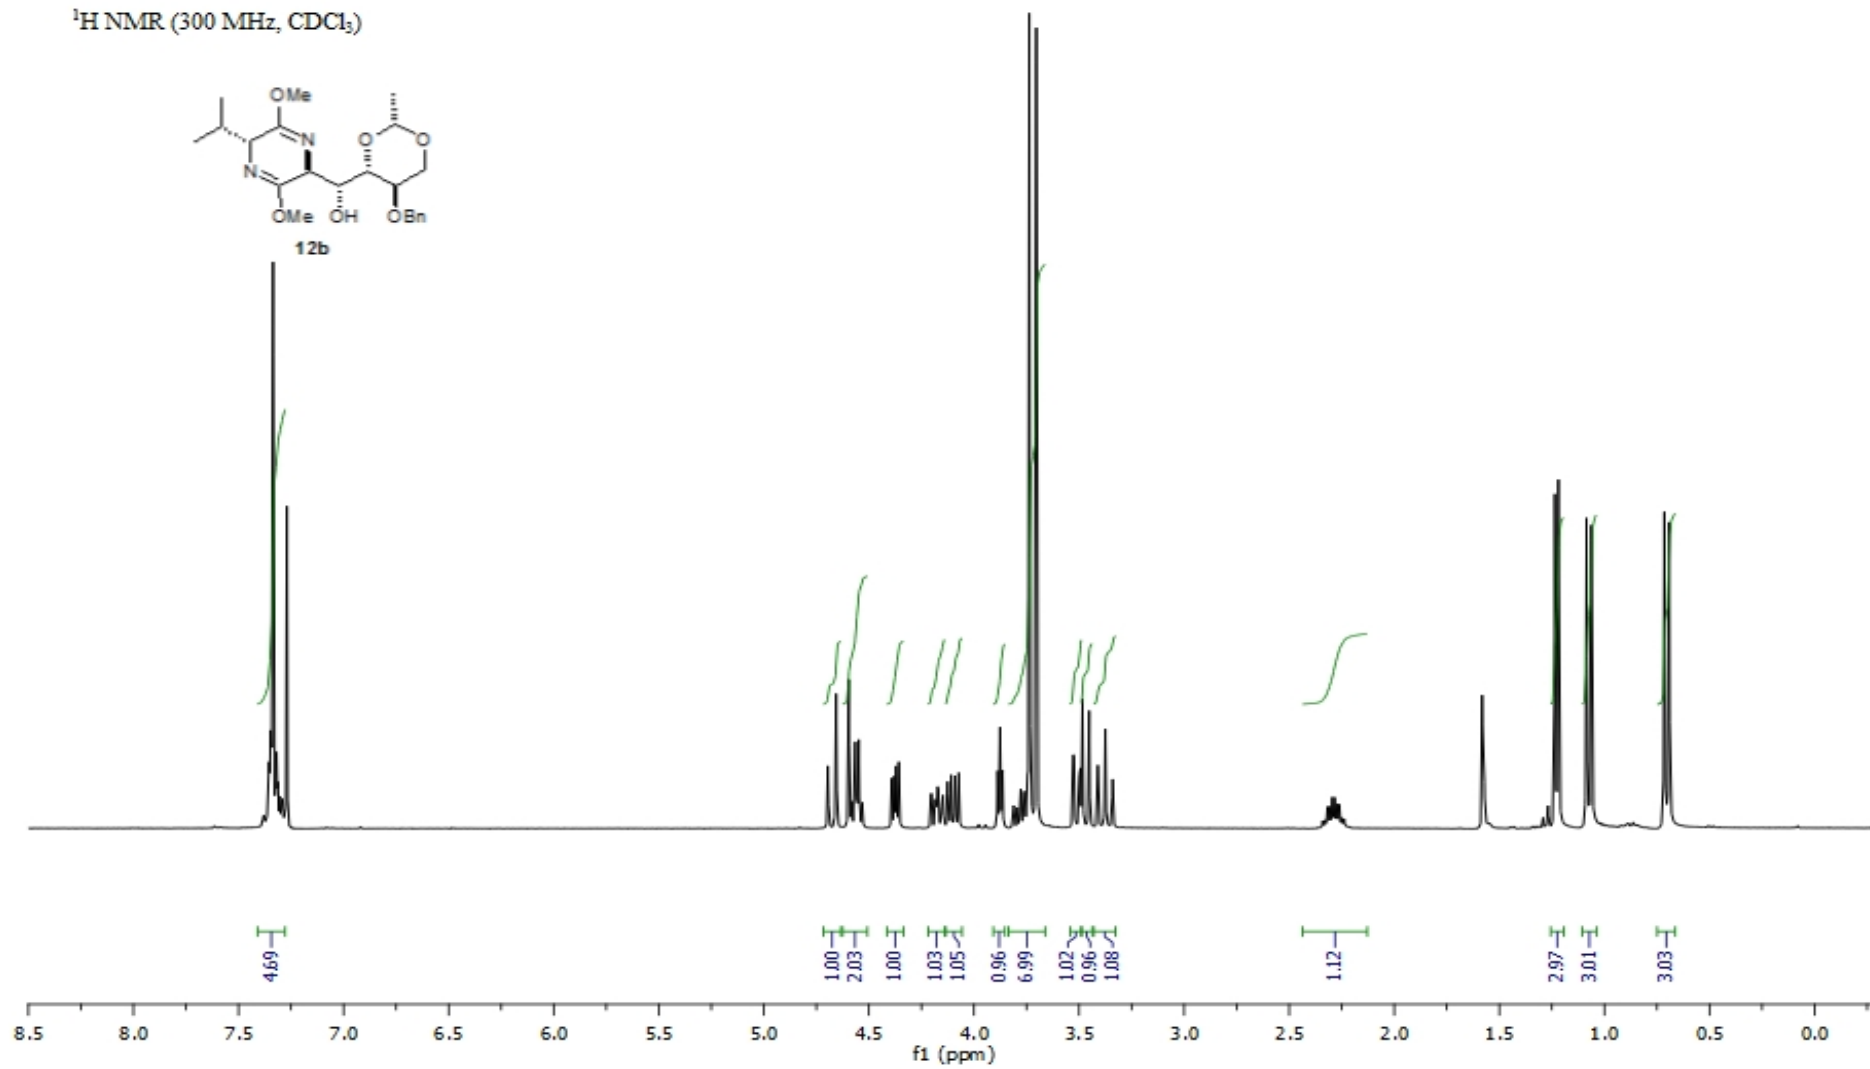

$^{13}\text{C}$  NMR (75 MHz,  $\text{CDCl}_3$ )

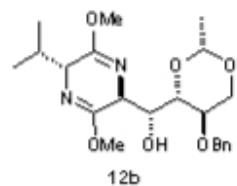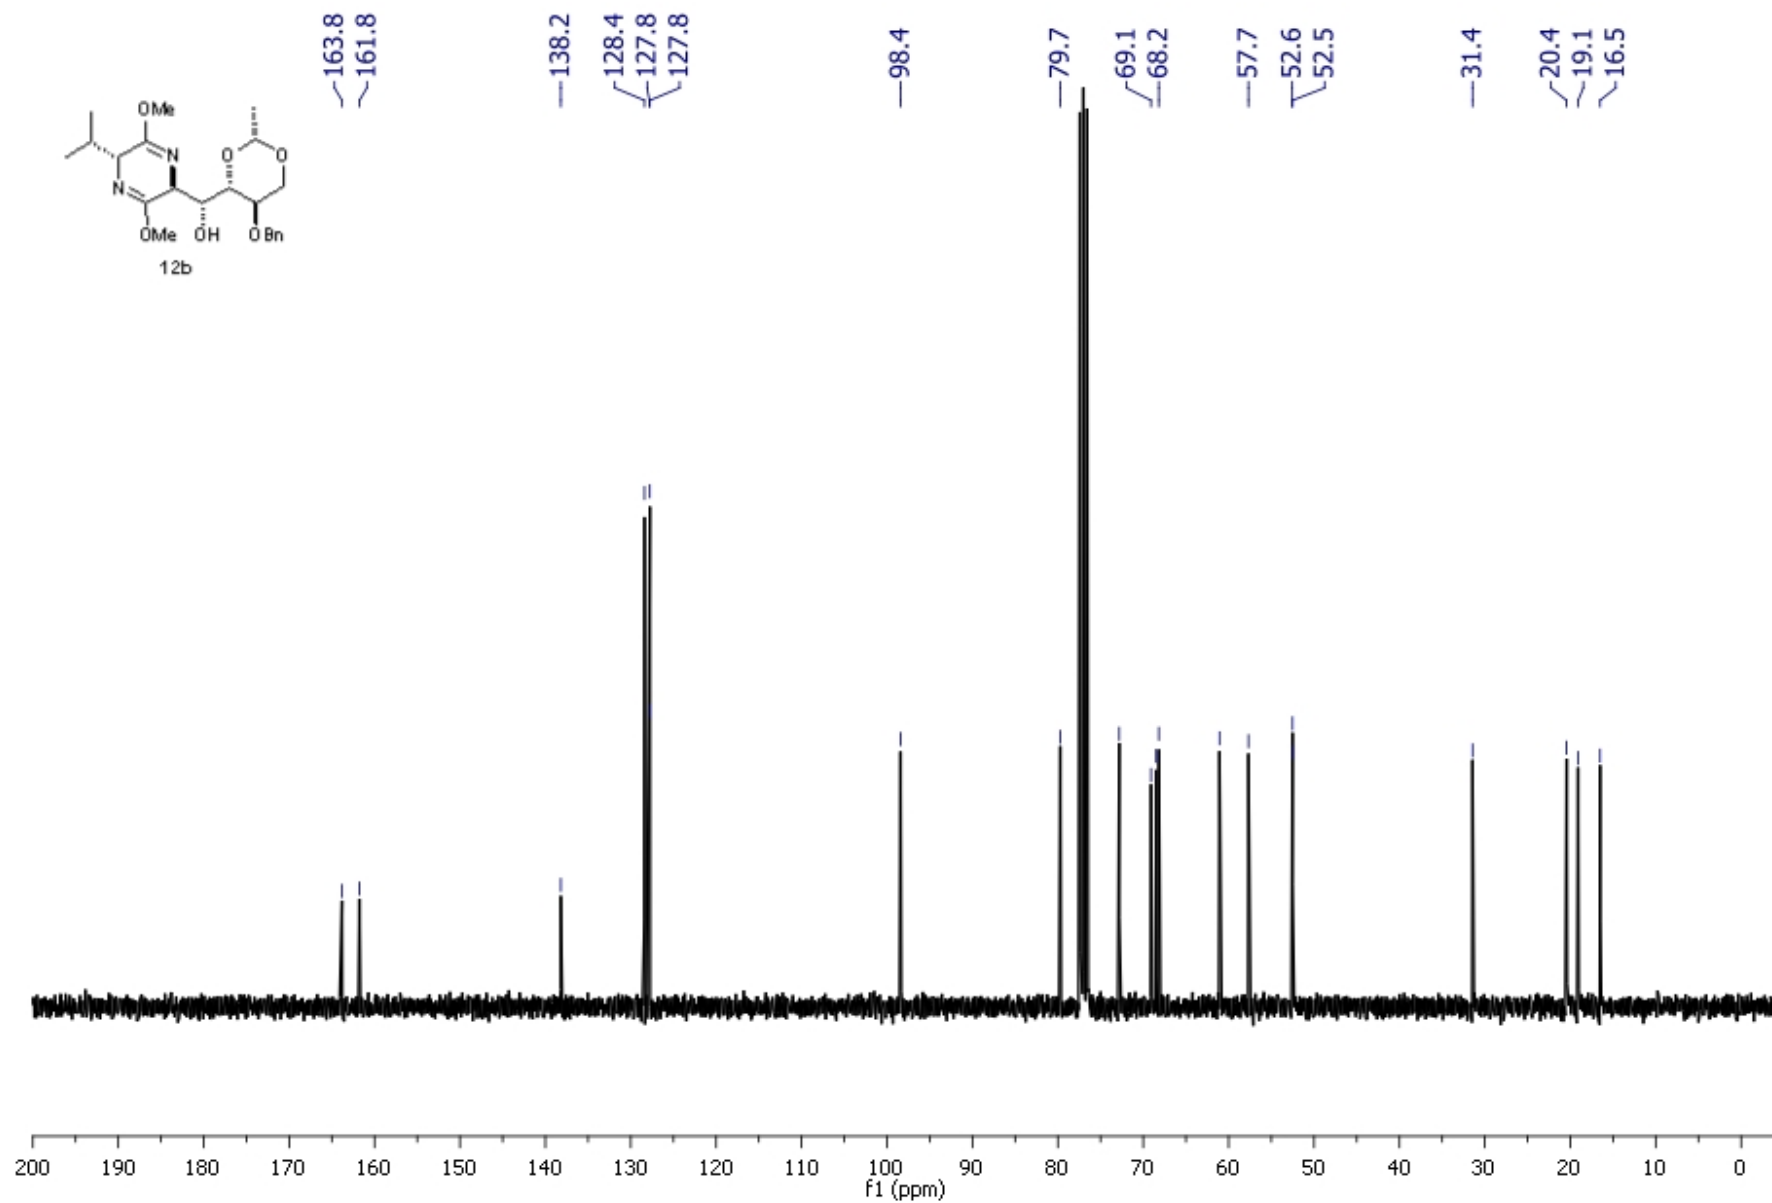



<sup>1</sup>H NMR (300 MHz, CDCl<sub>3</sub>)

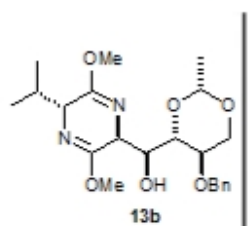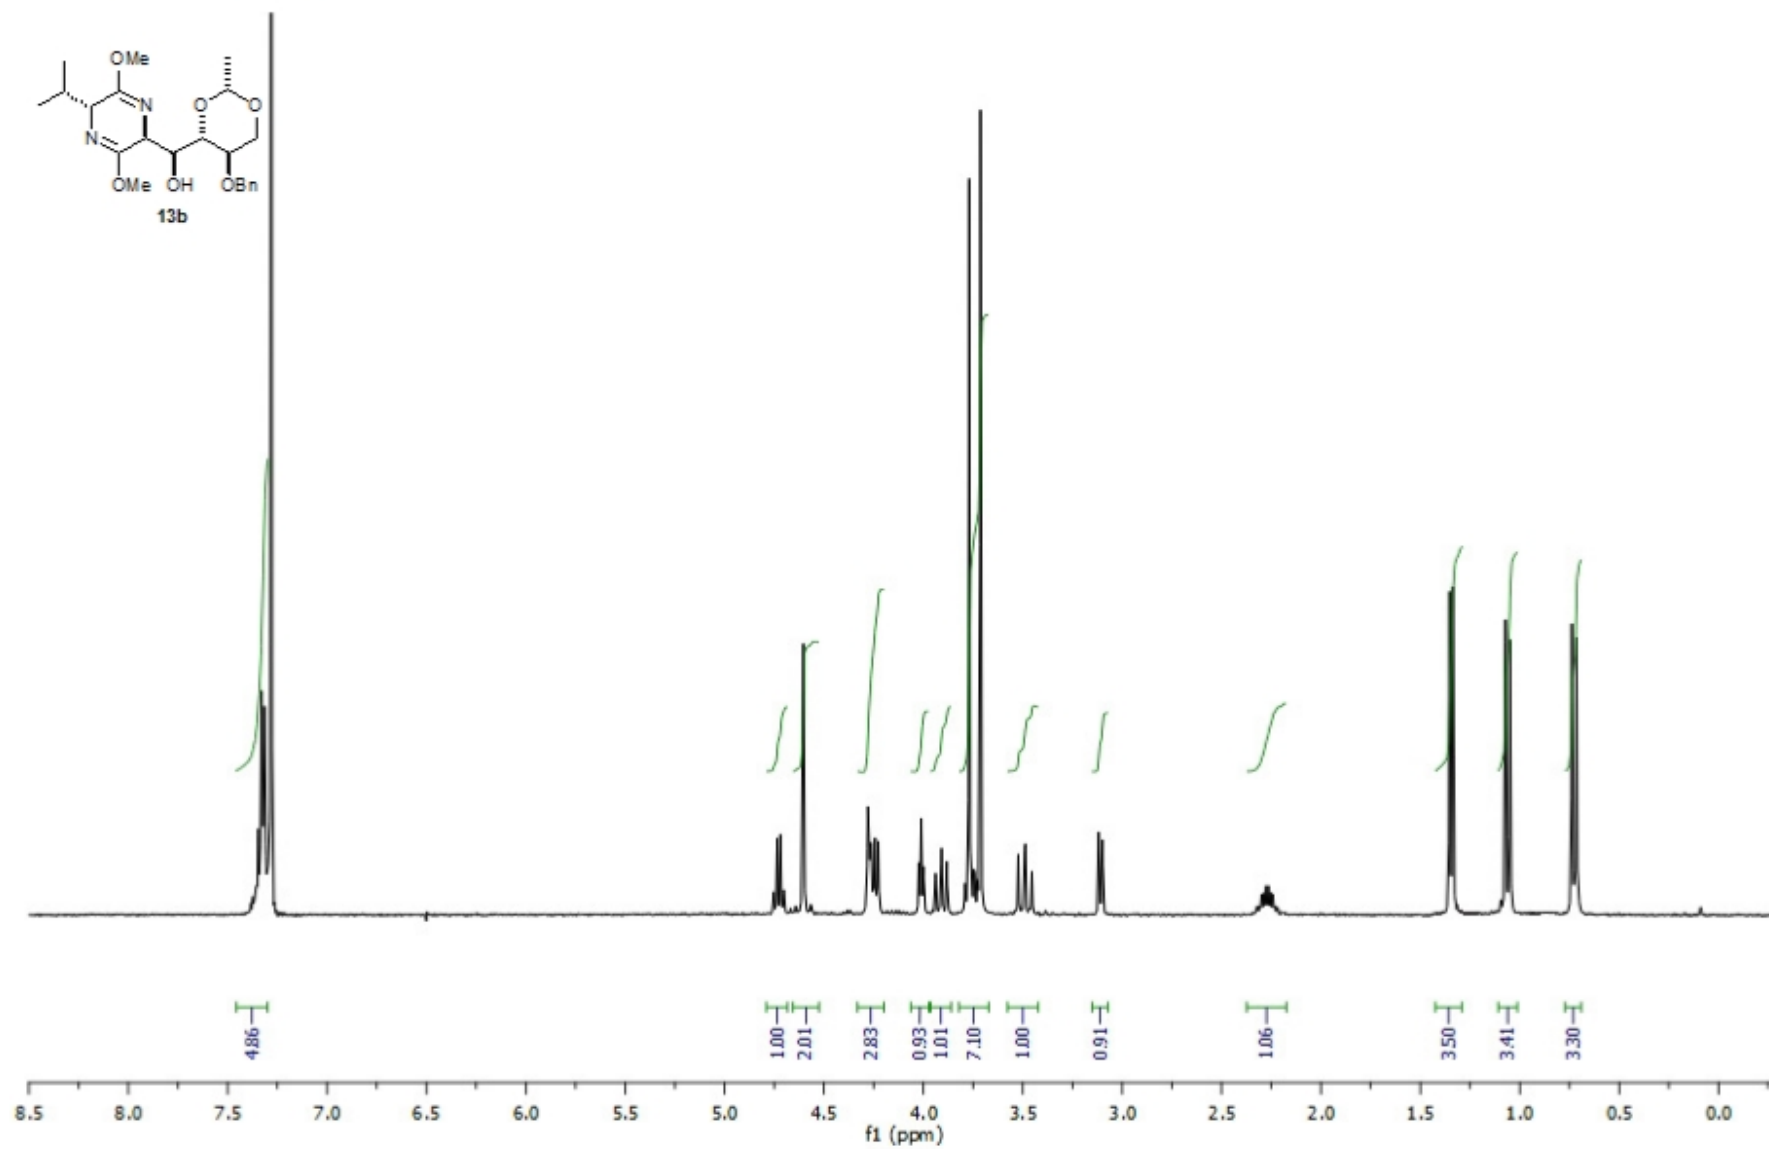

$^{13}\text{C}$  NMR (75 MHz,  $\text{CDCl}_3$ )

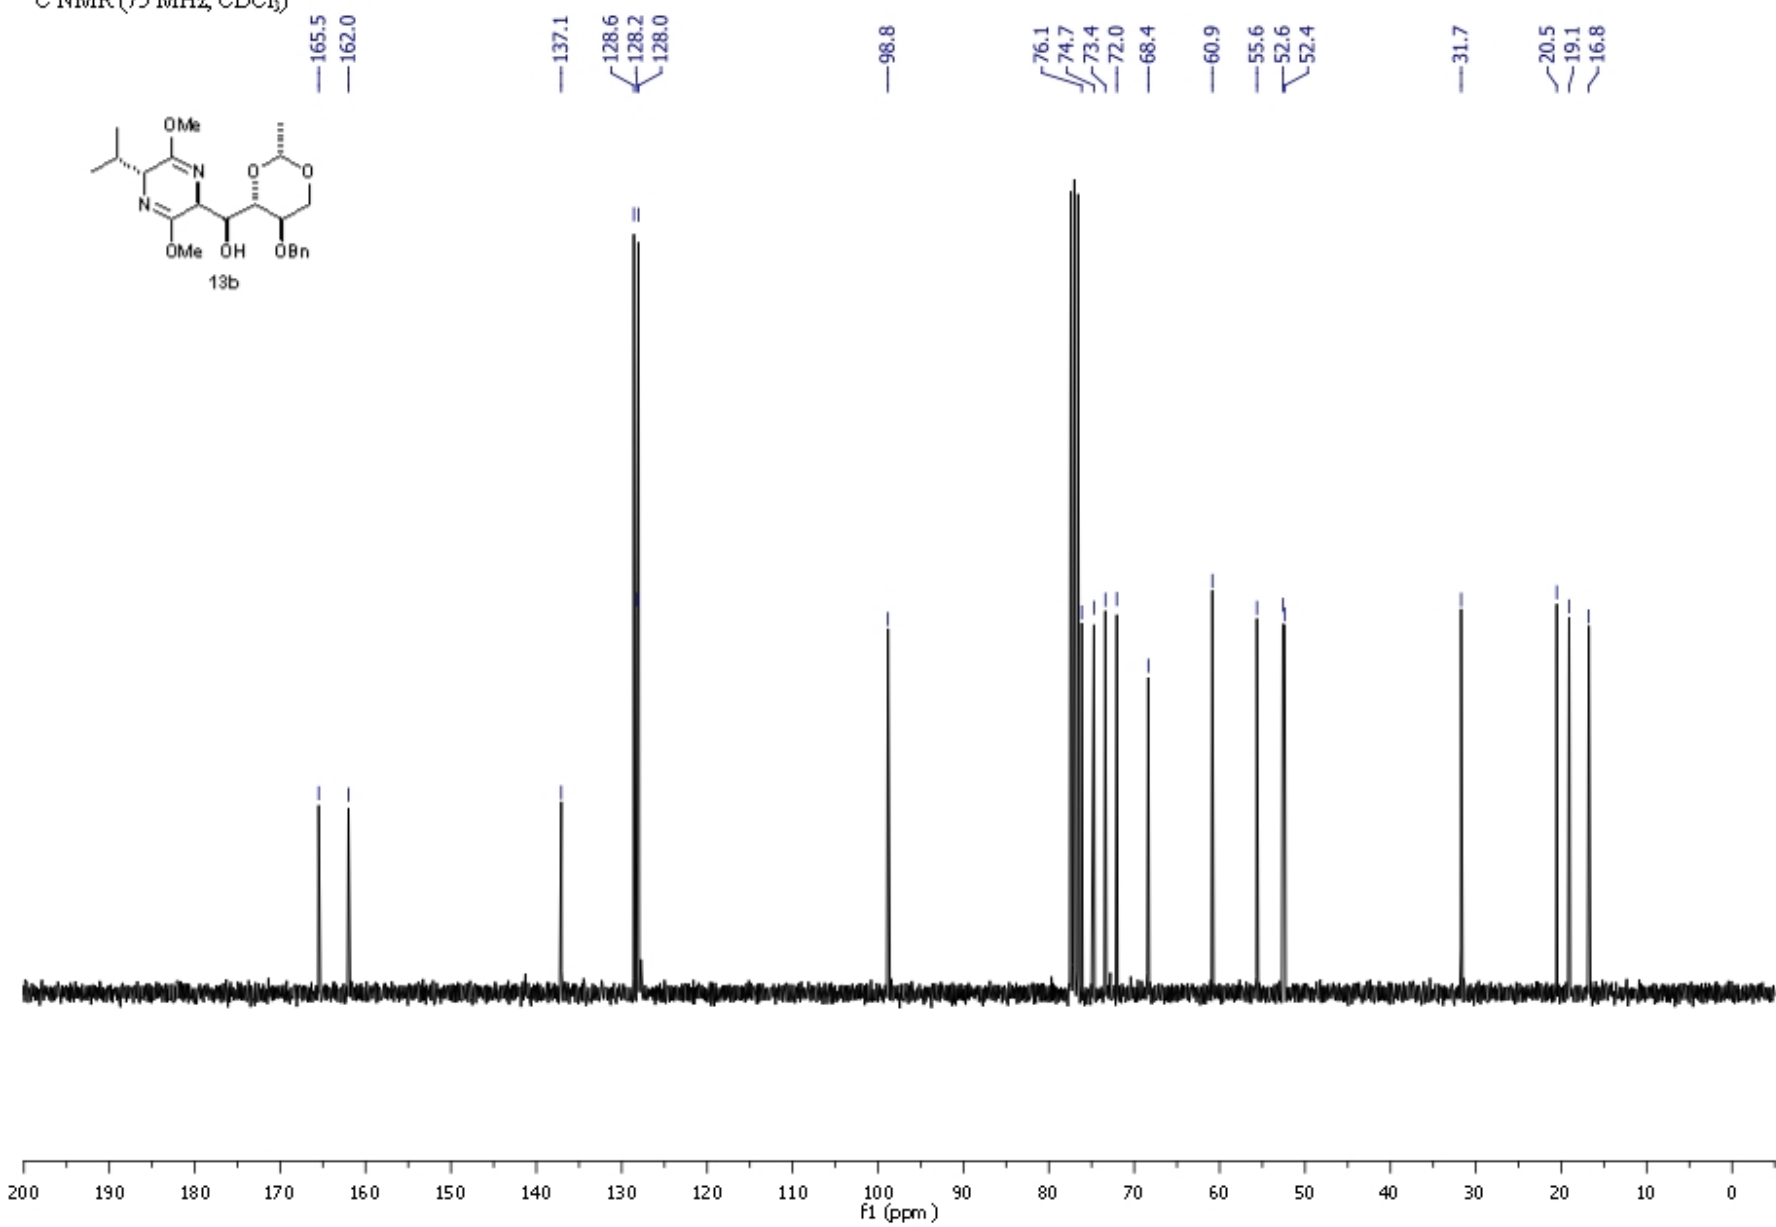

<sup>1</sup>H NMR (300 MHz, MeOD)

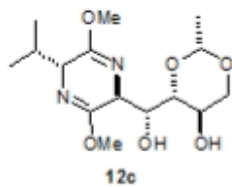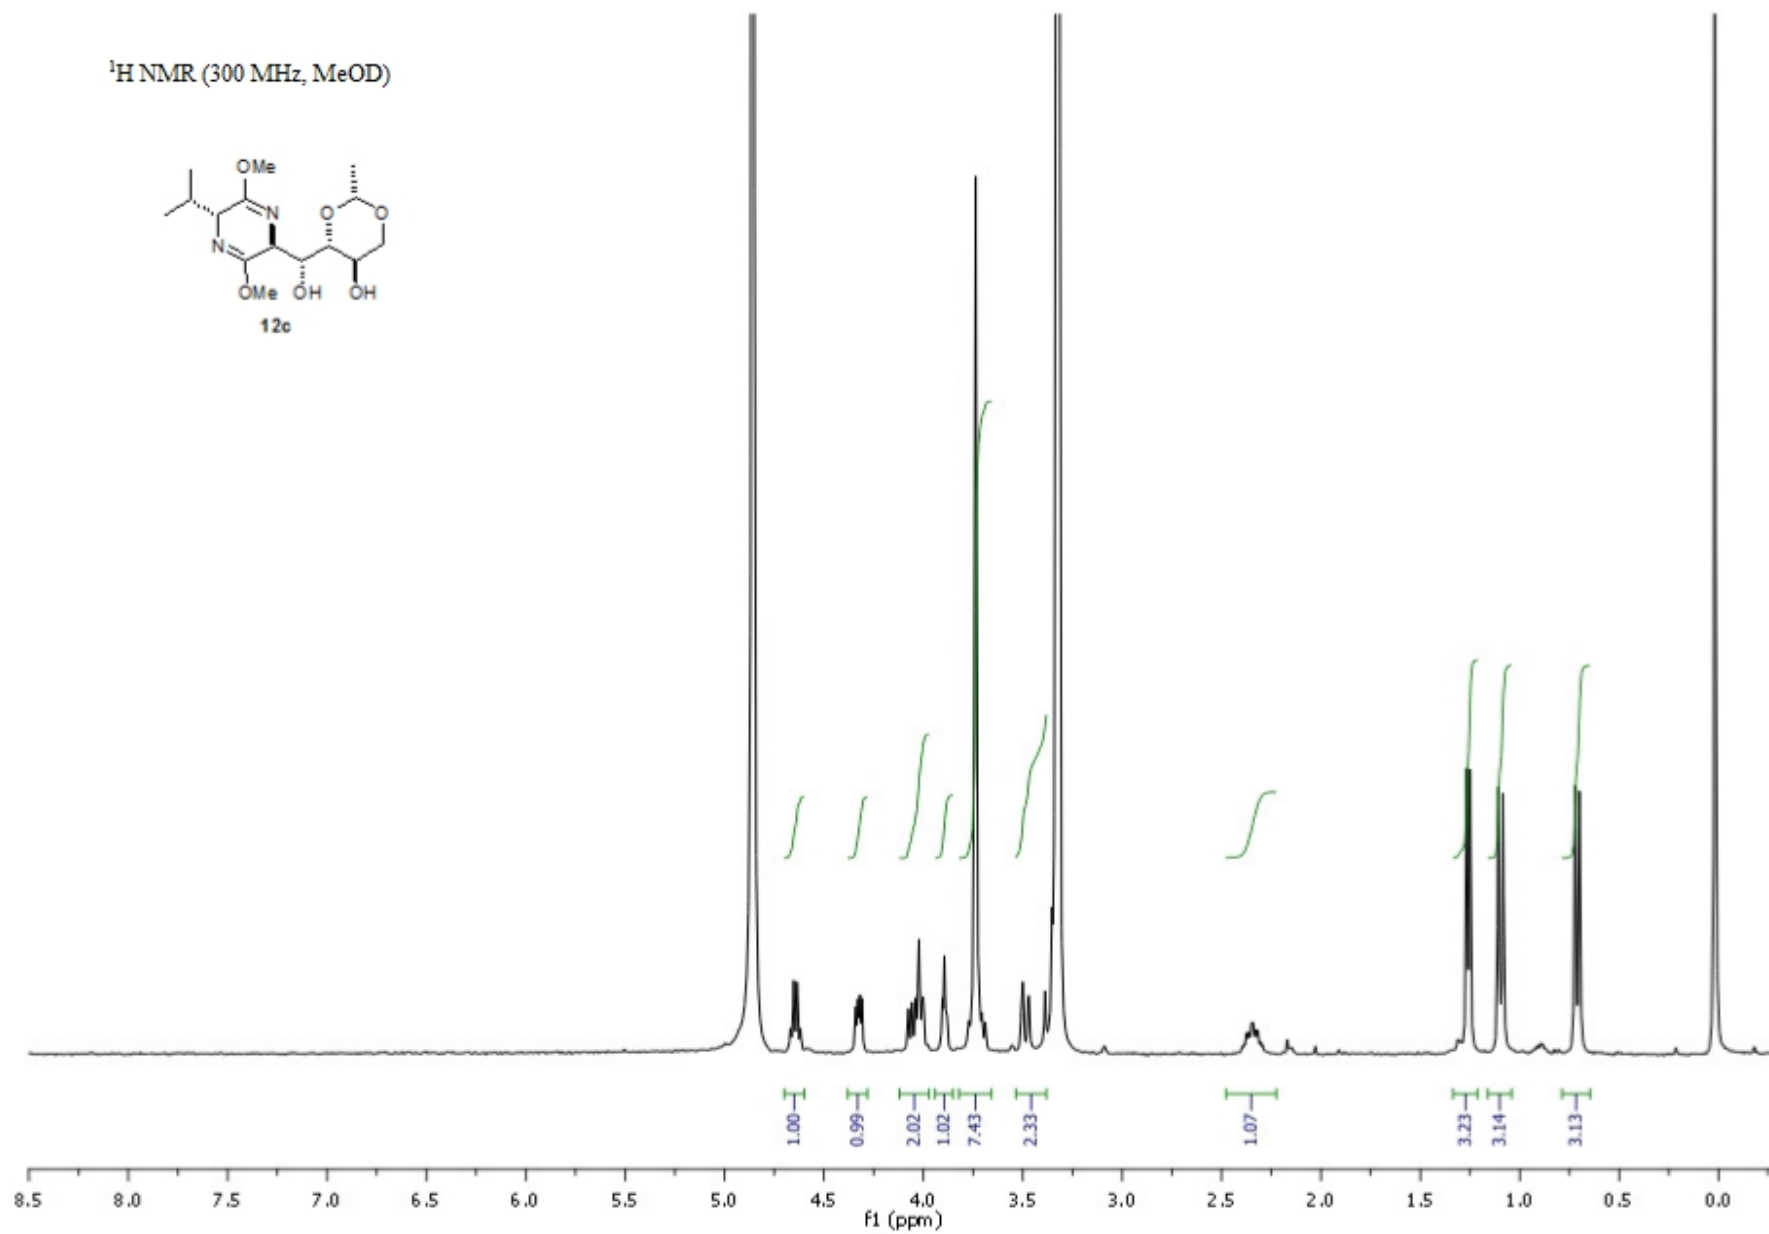

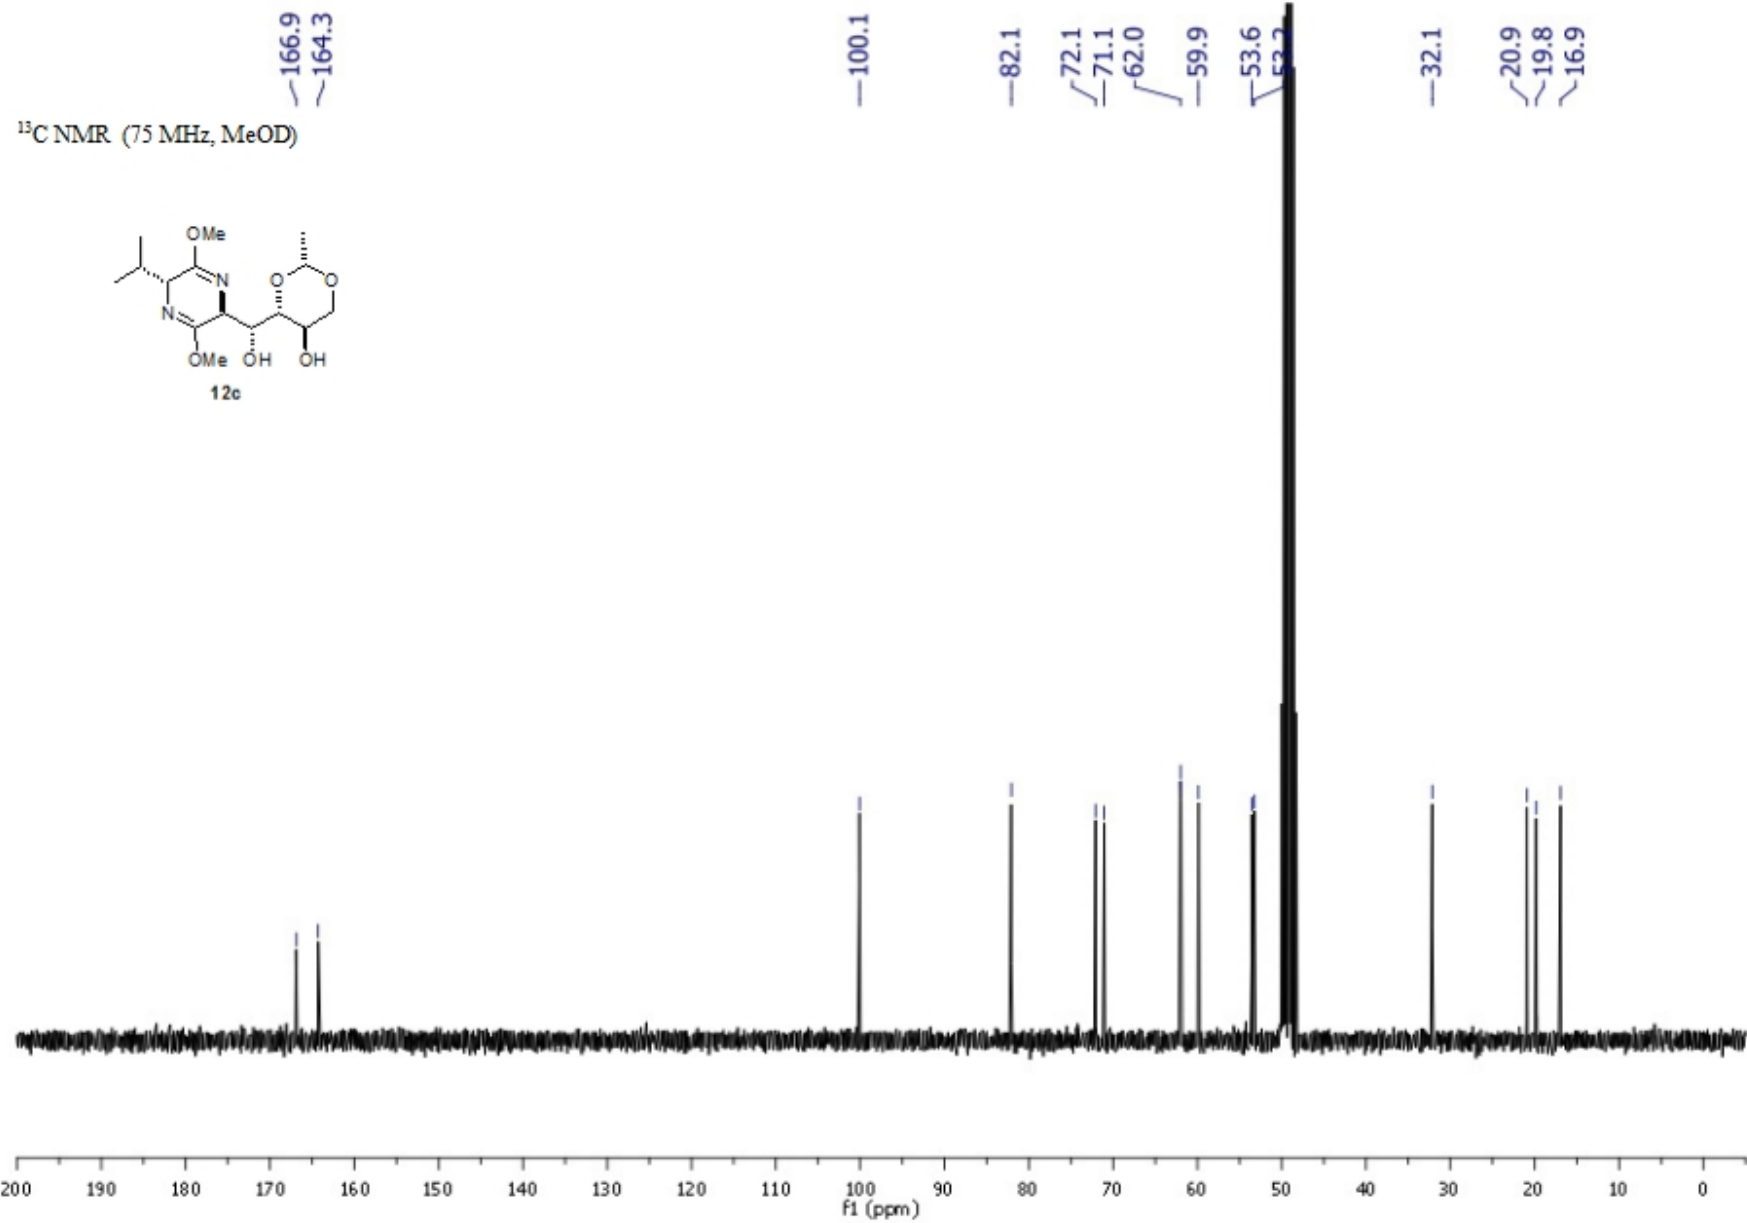

$^1\text{H}$  NMR (300 MHz,  $\text{CDCl}_3$ )

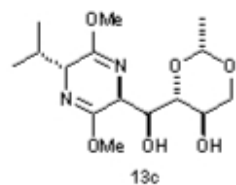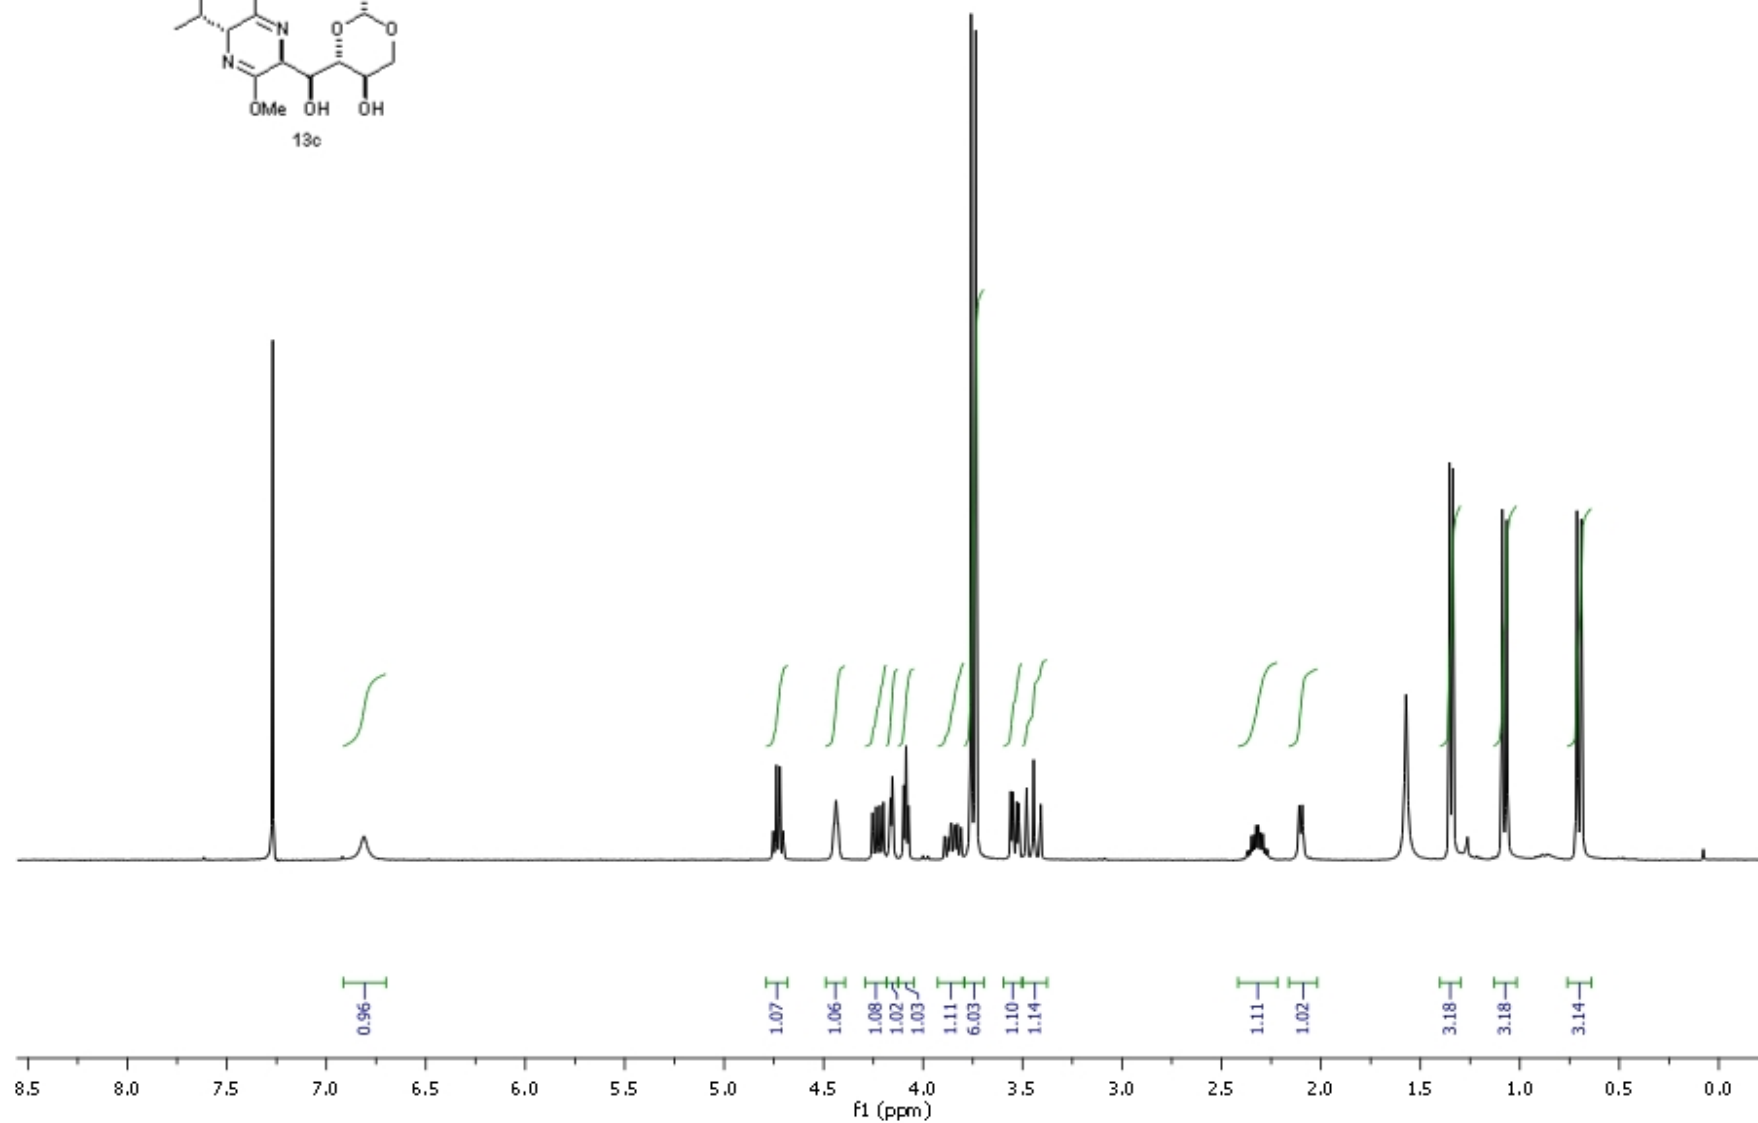

$^{13}\text{C}$  NMR (75 MHz,  $\text{CDCl}_3$ )

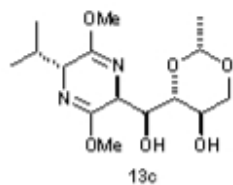

—98.6  
—83.1  
—73.4  
—70.0  
60.7  
59.5  
56.5  
53.4  
52.9  
—31.6  
20.5  
19.1

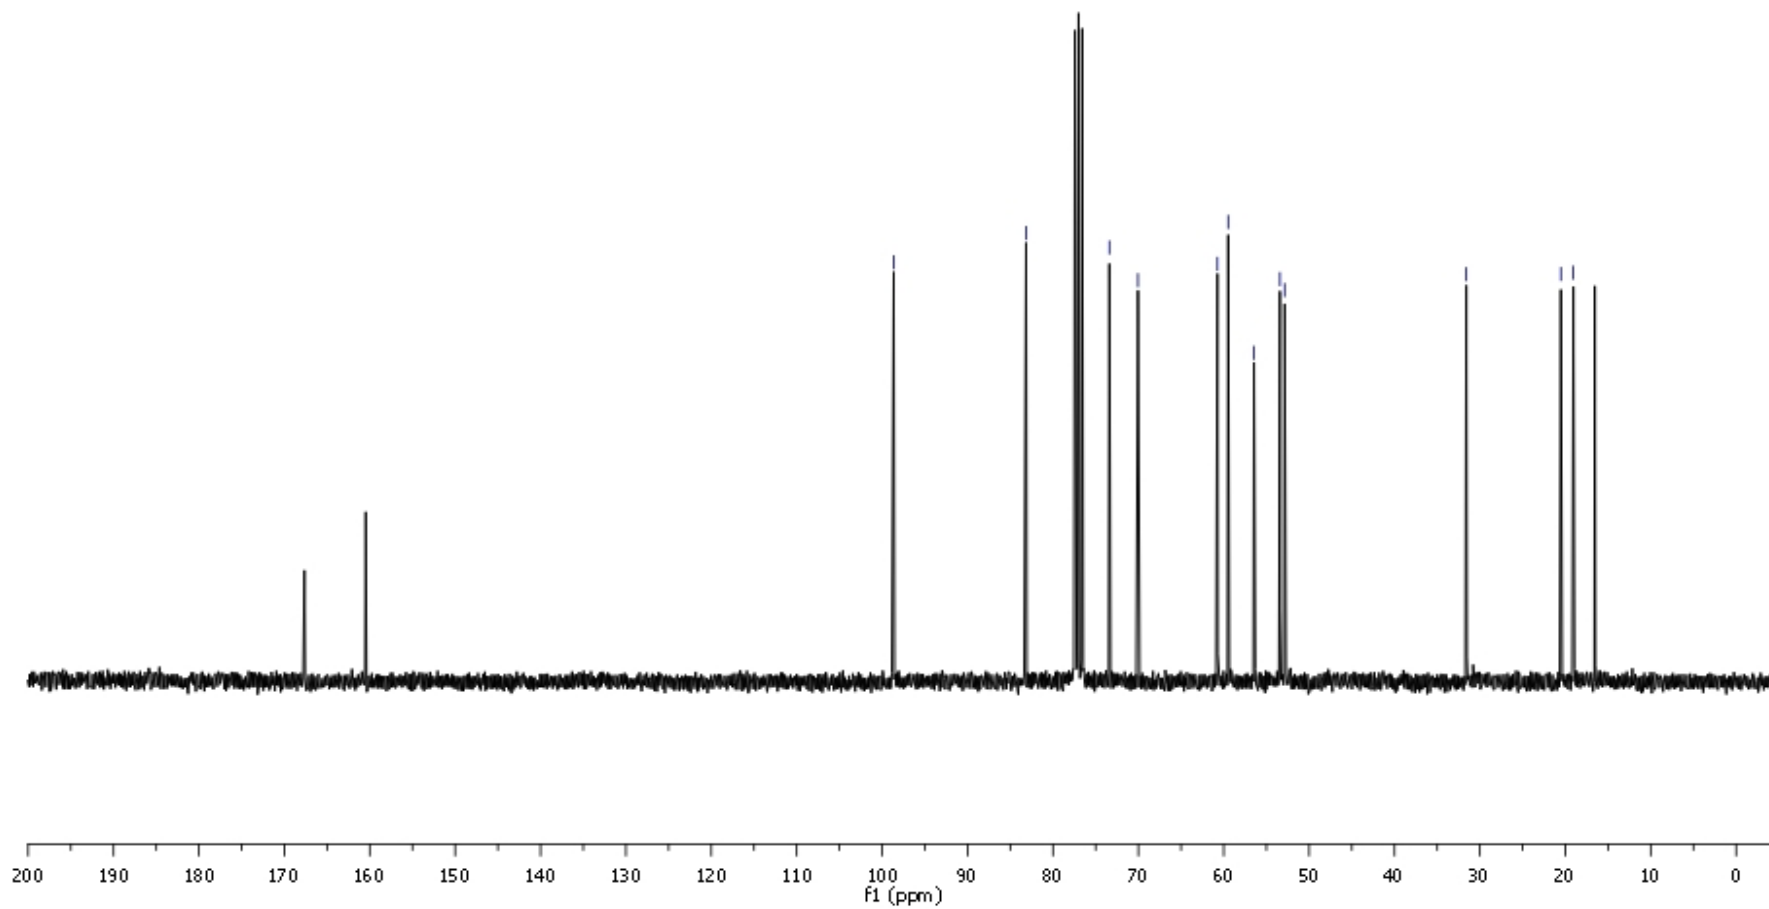

<sup>1</sup>H NMR (300 MHz, CDCl<sub>3</sub>)

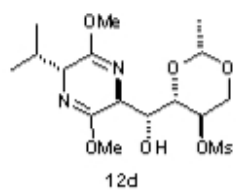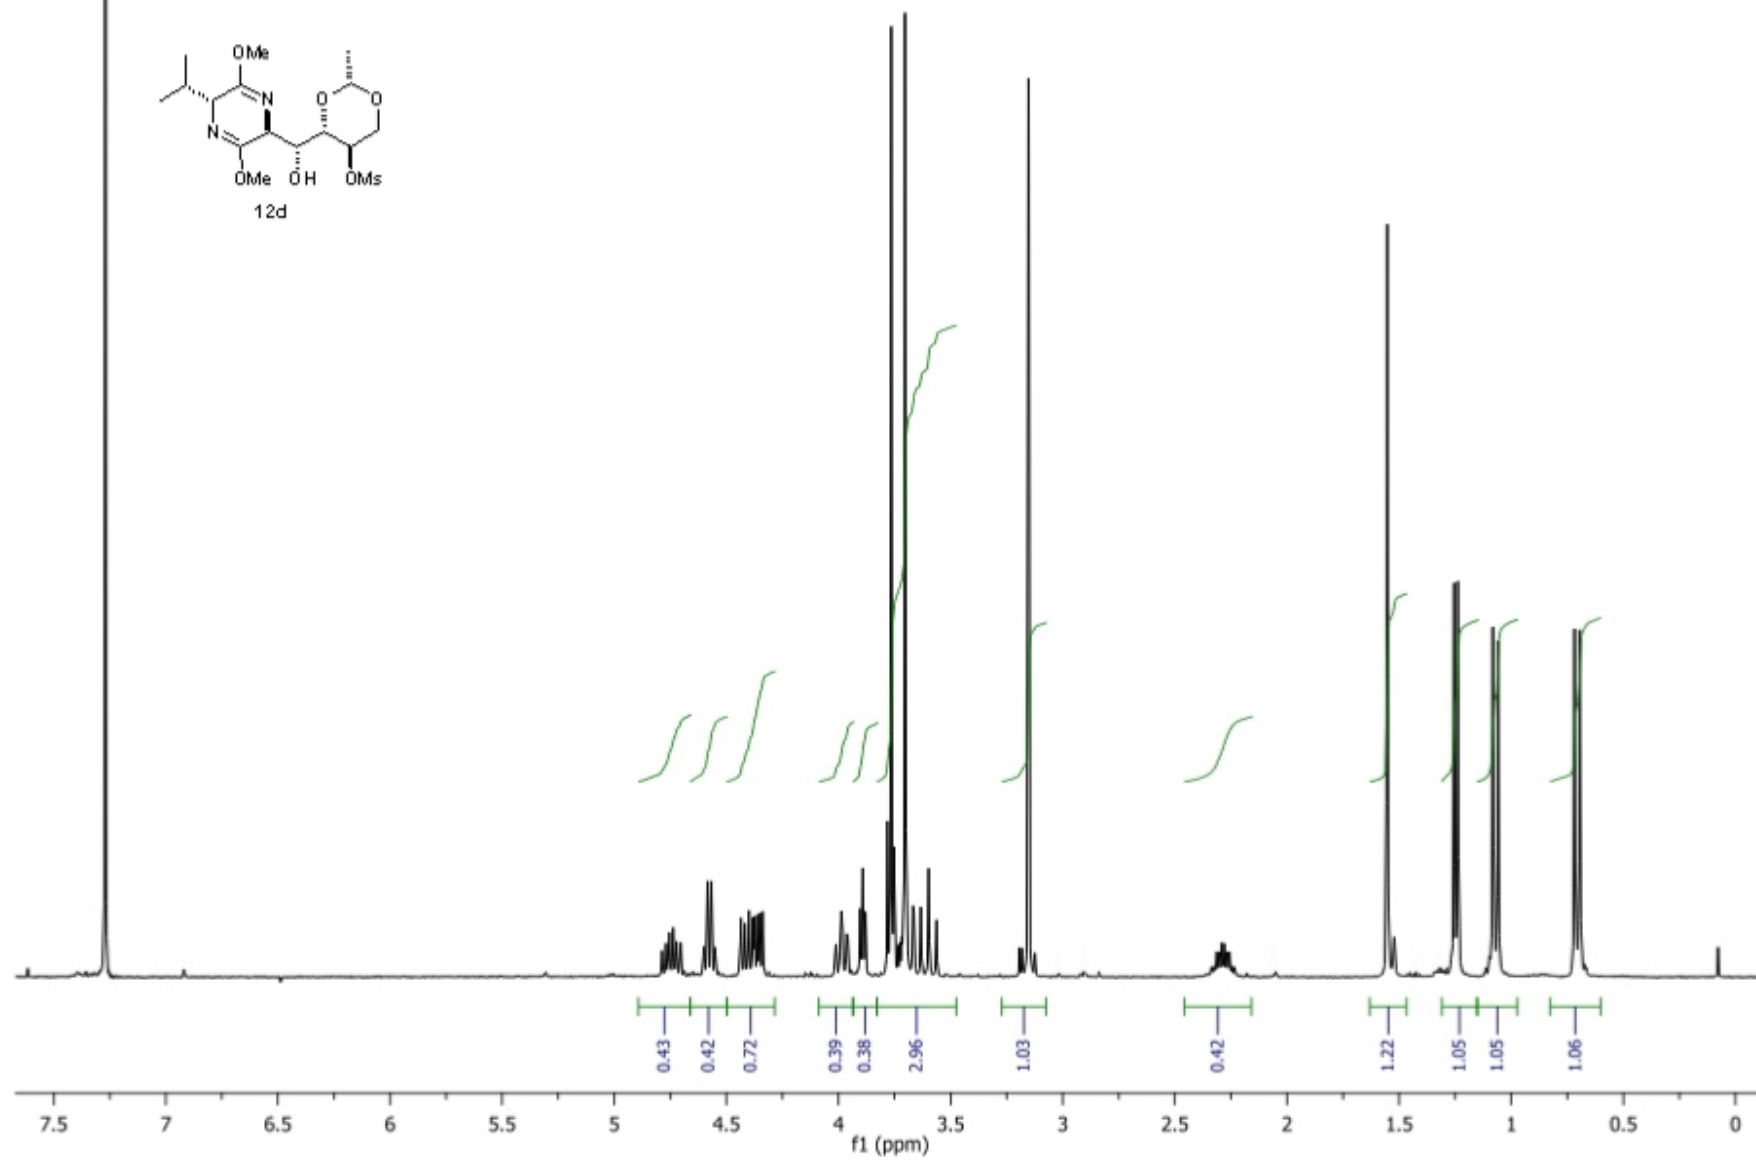

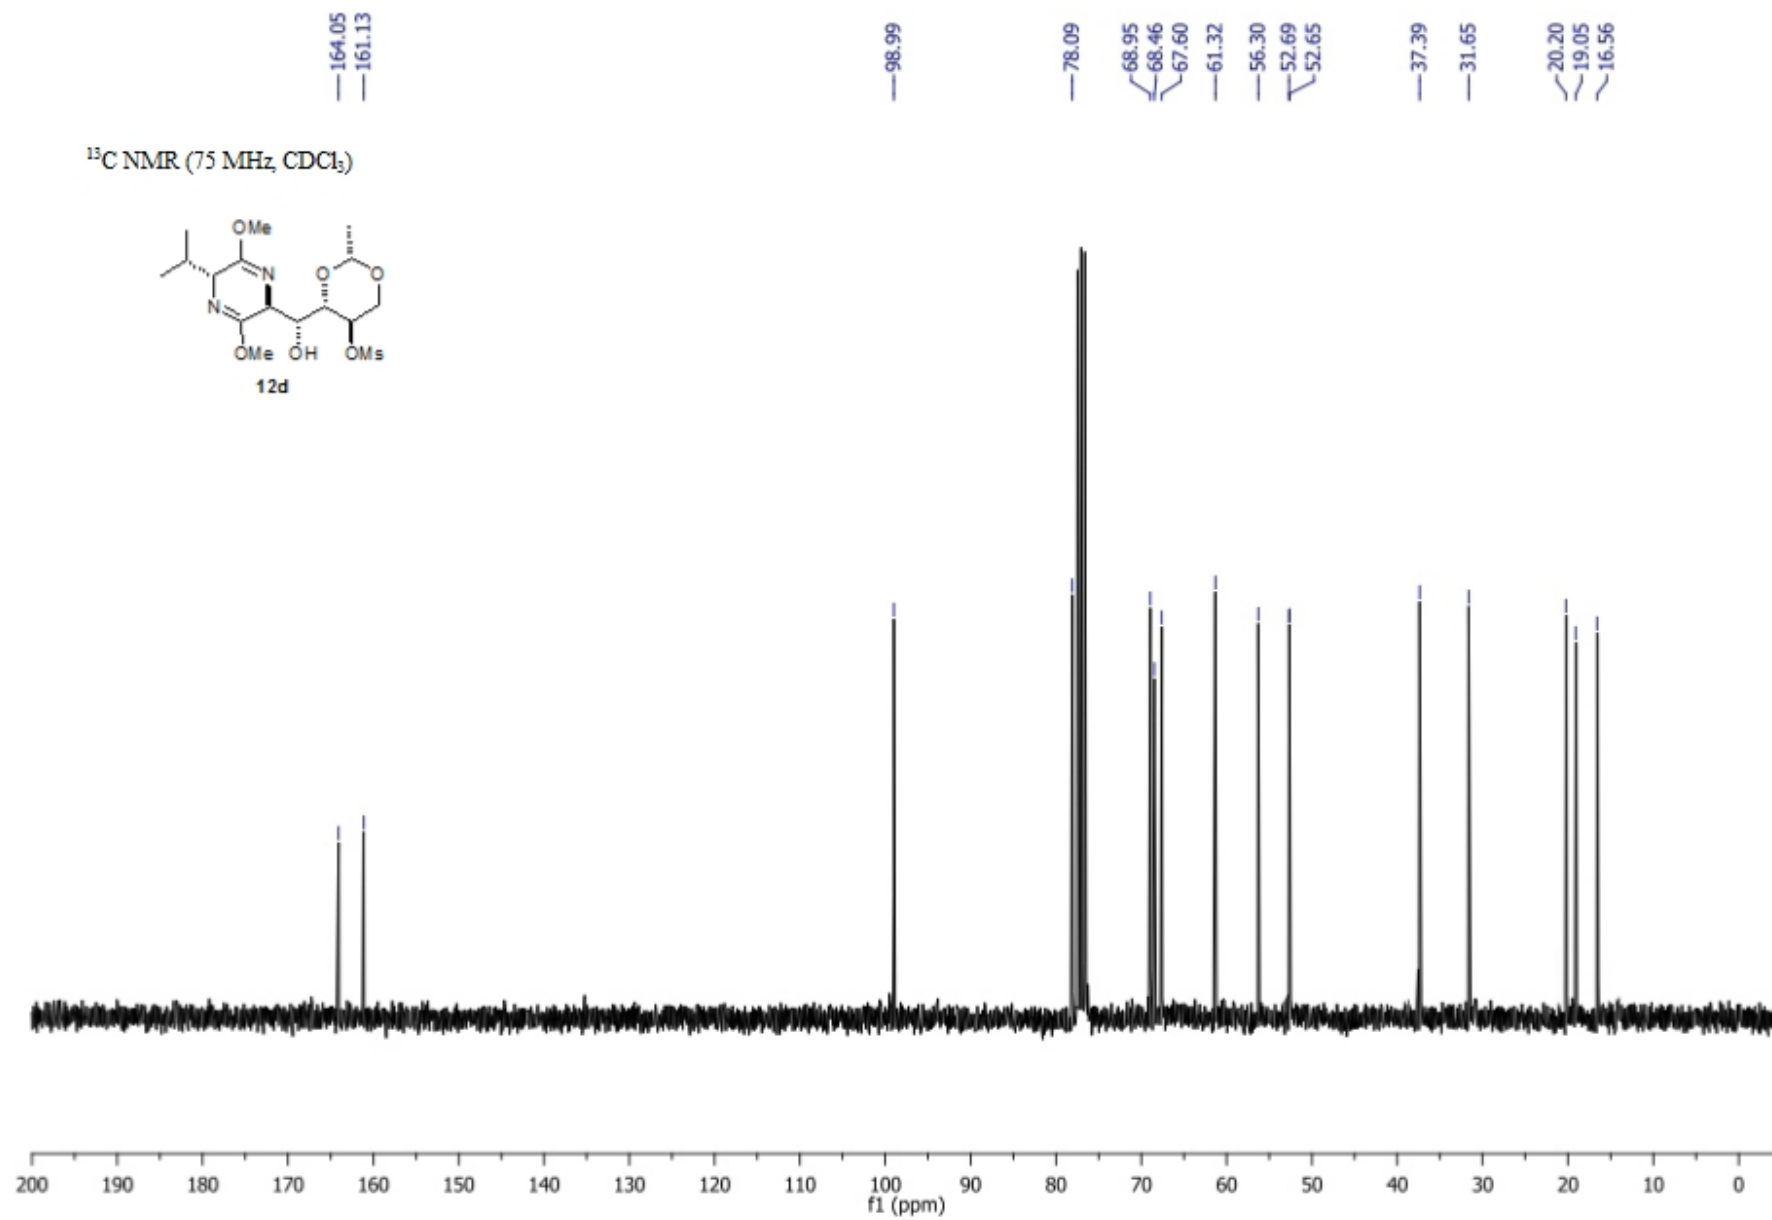



$^1\text{H}$  NMR (300 MHz,  $\text{CDCl}_3$ )

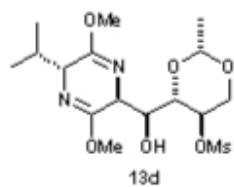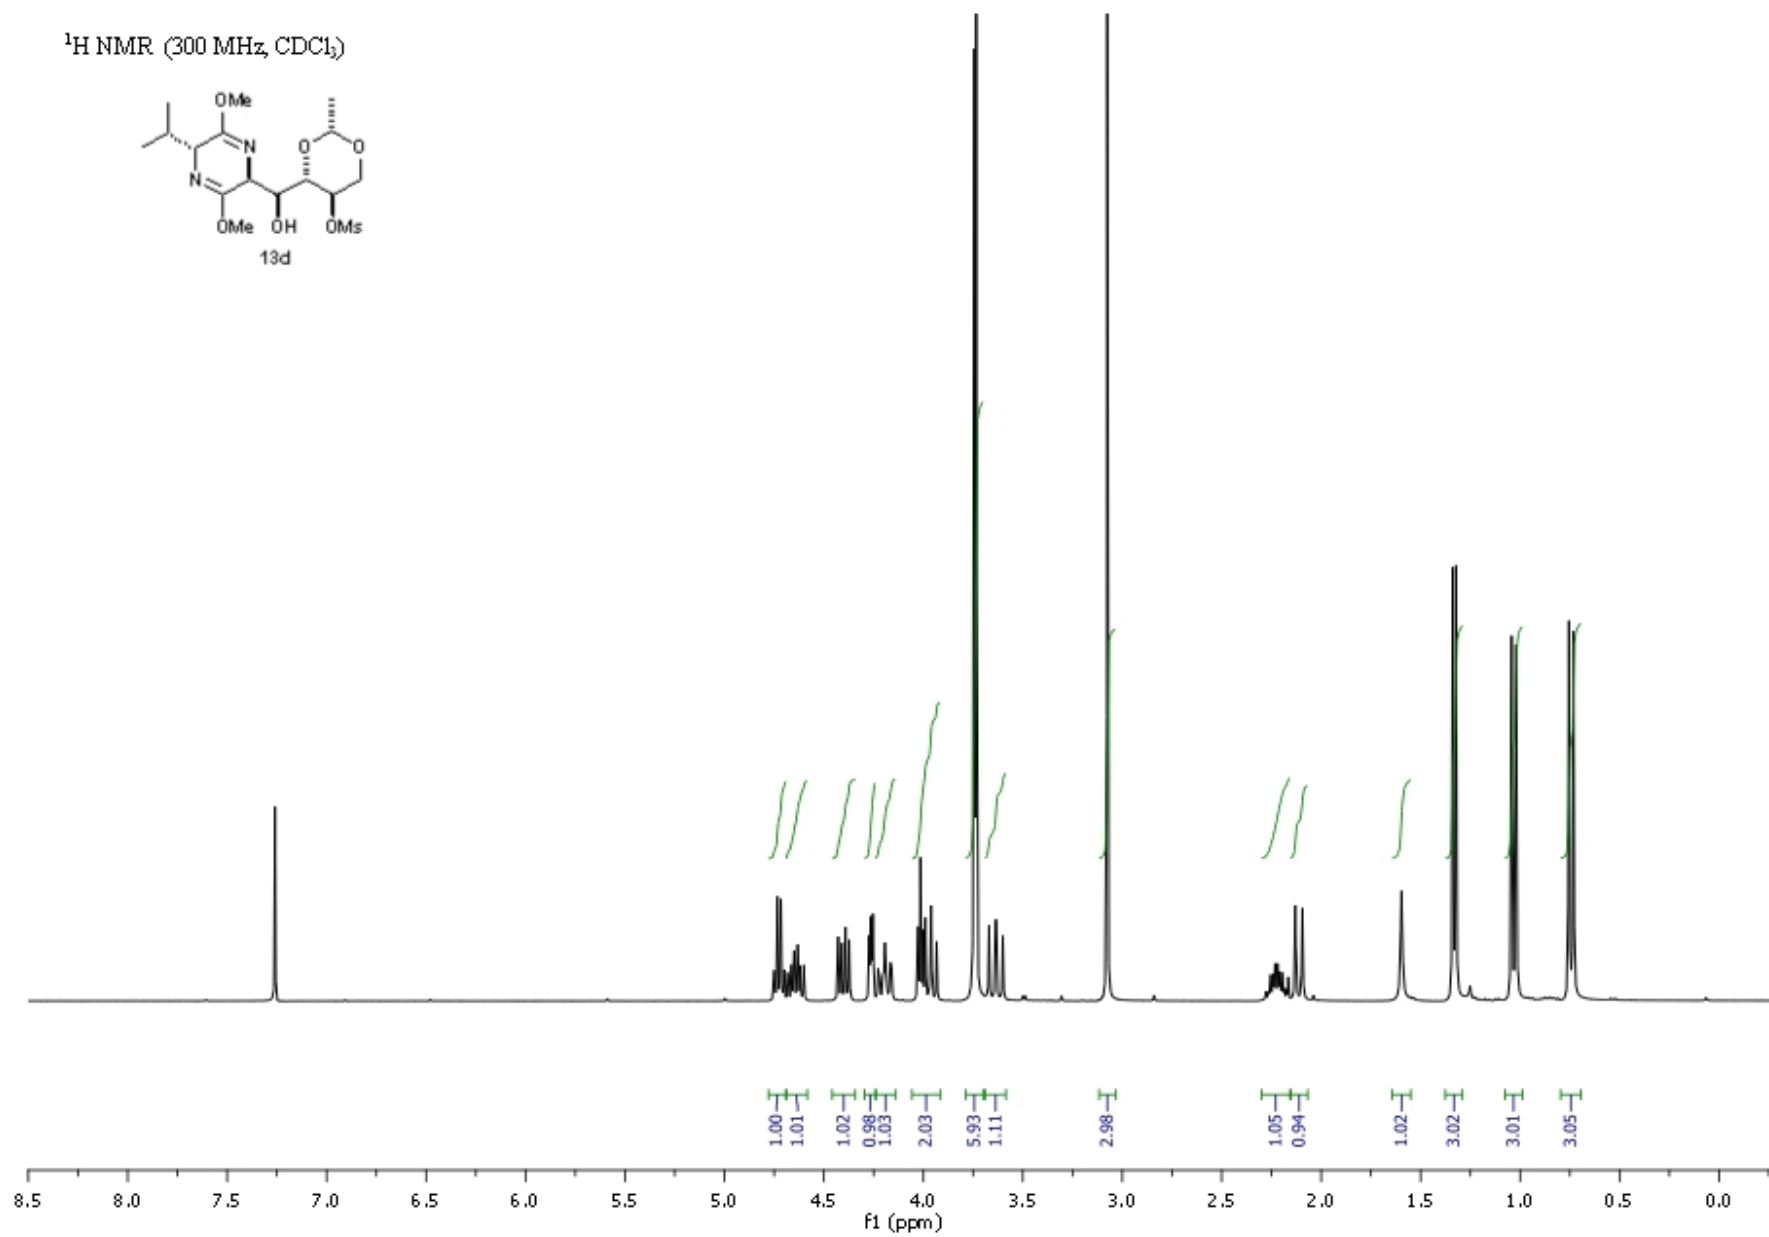

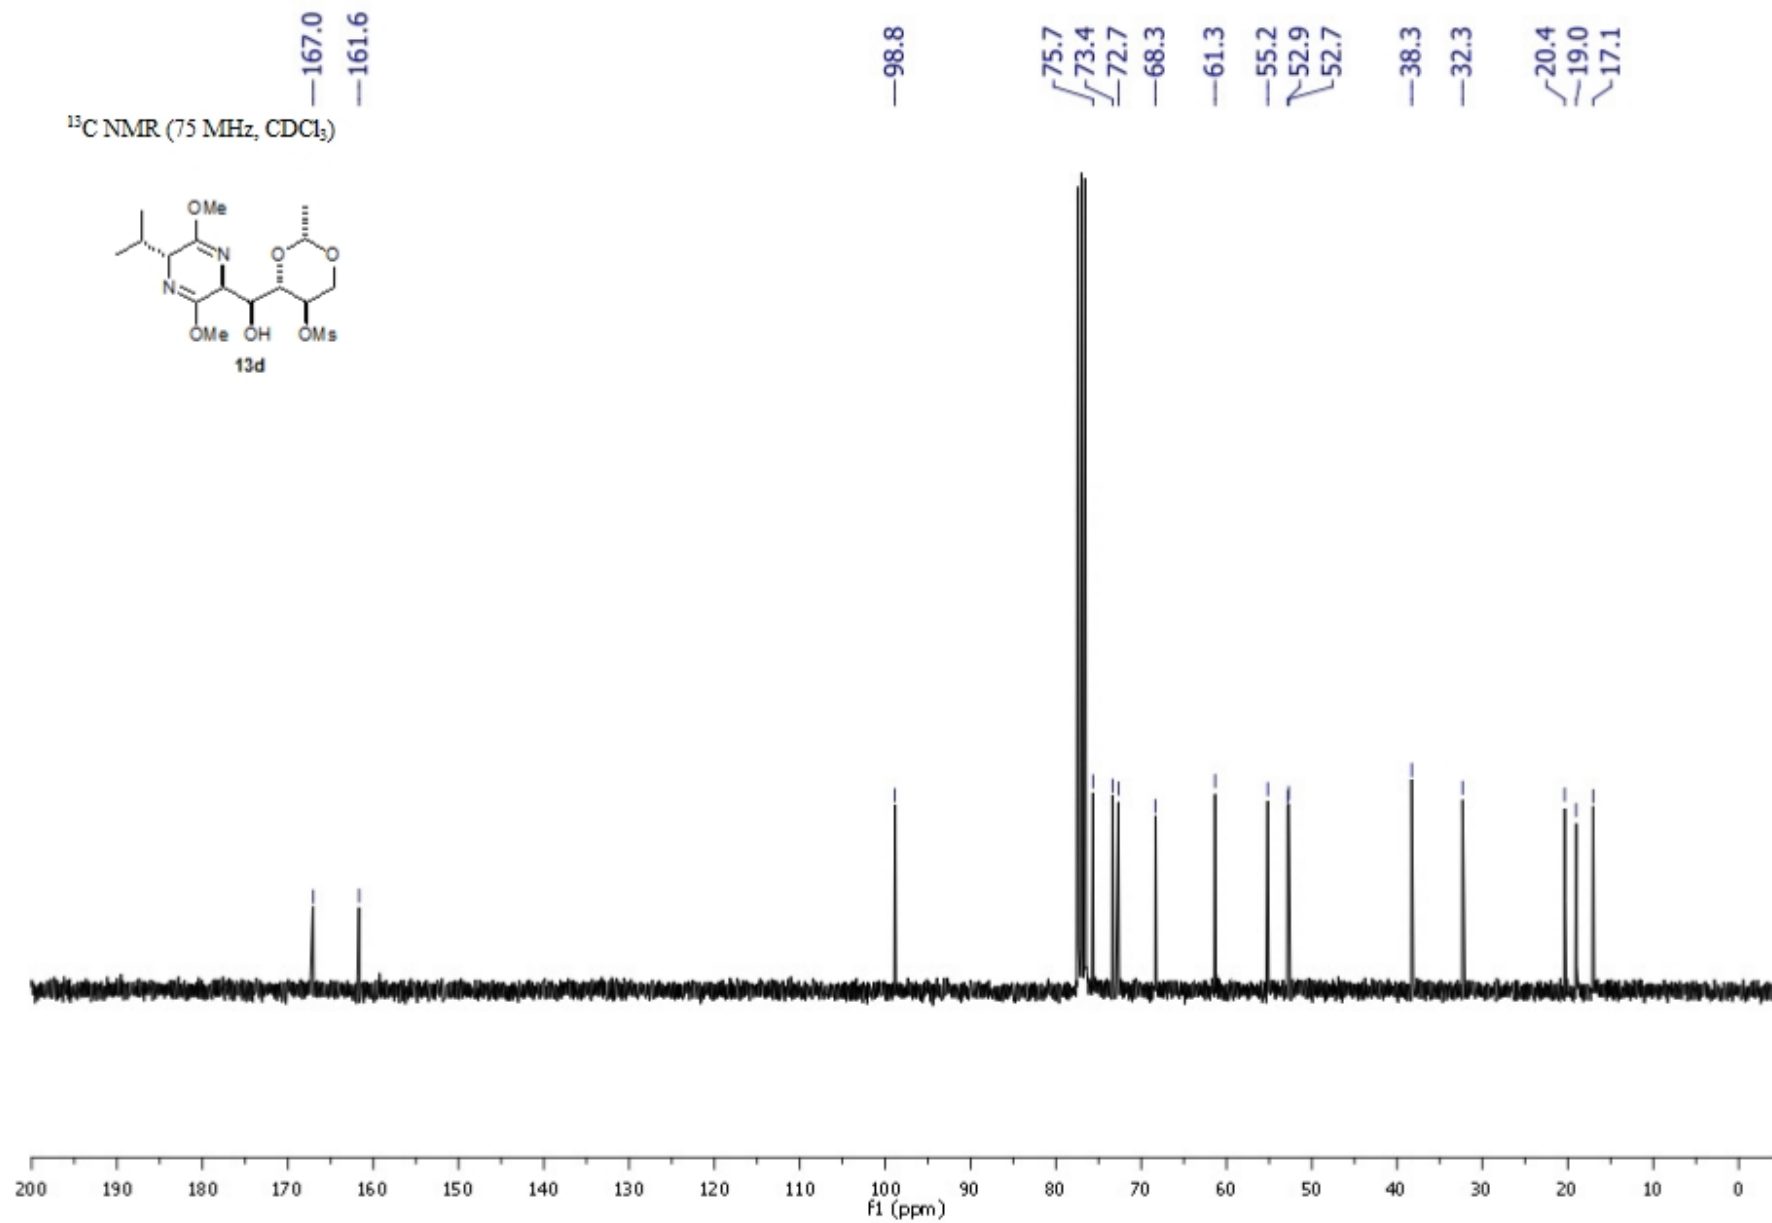

$^1\text{H}$  NMR (300 MHz,  $\text{CDCl}_3$ )

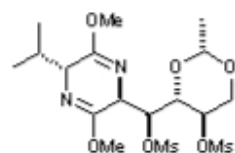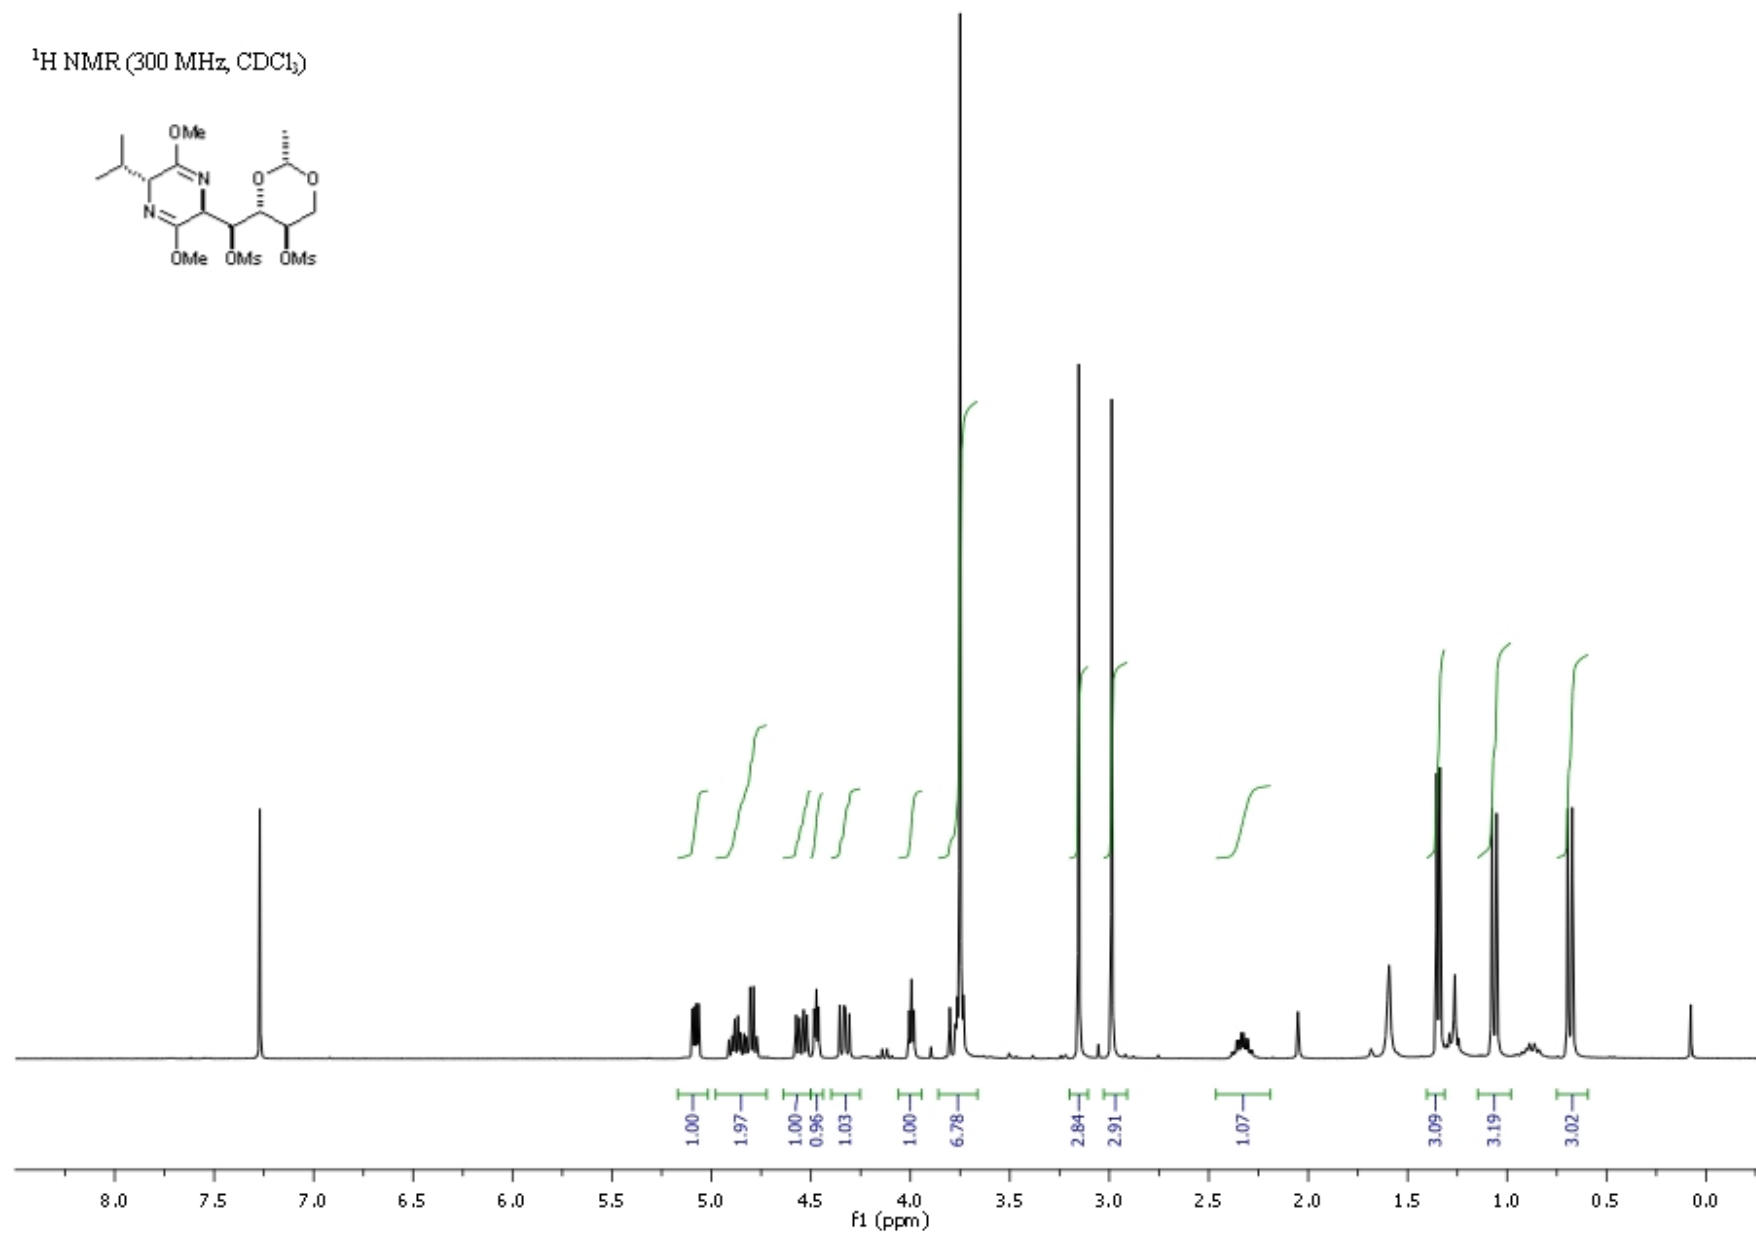



$^1\text{H}$  NMR (300 MHz,  $\text{CDCl}_3$ )

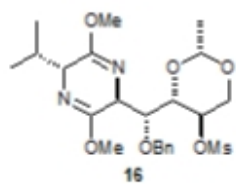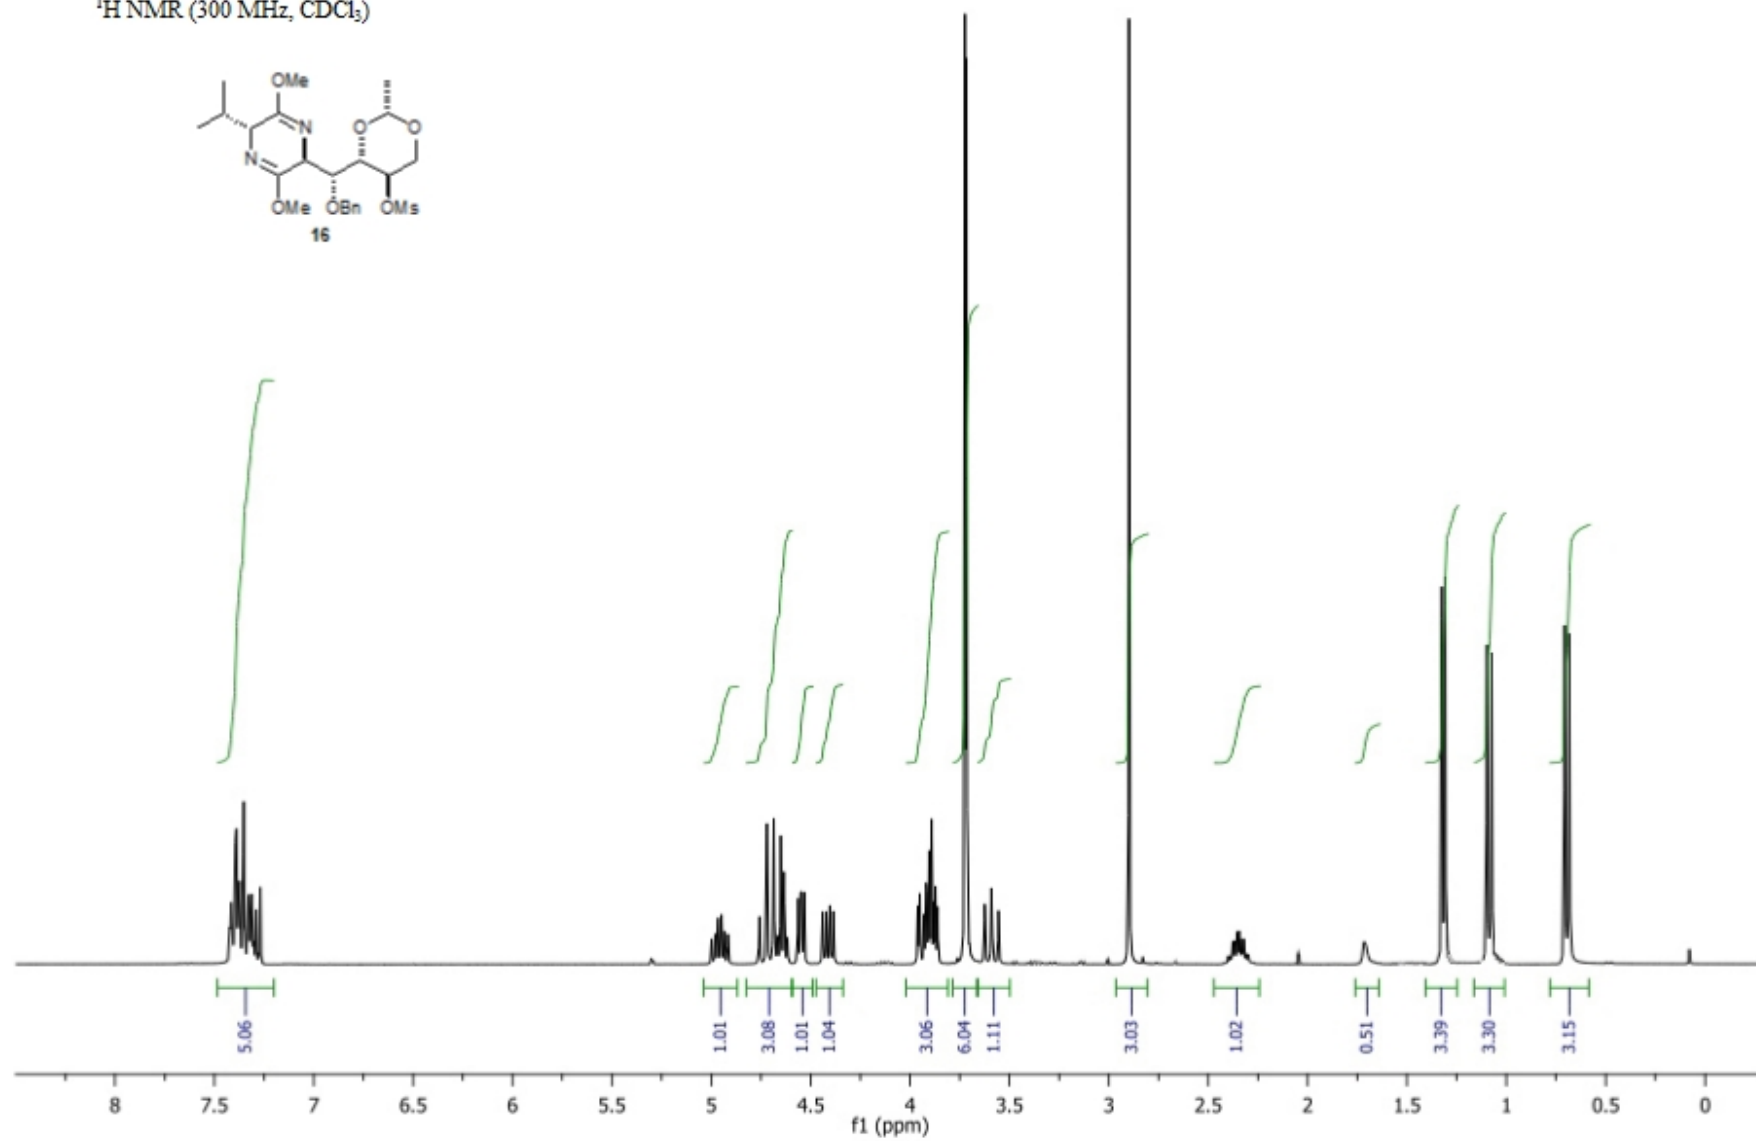

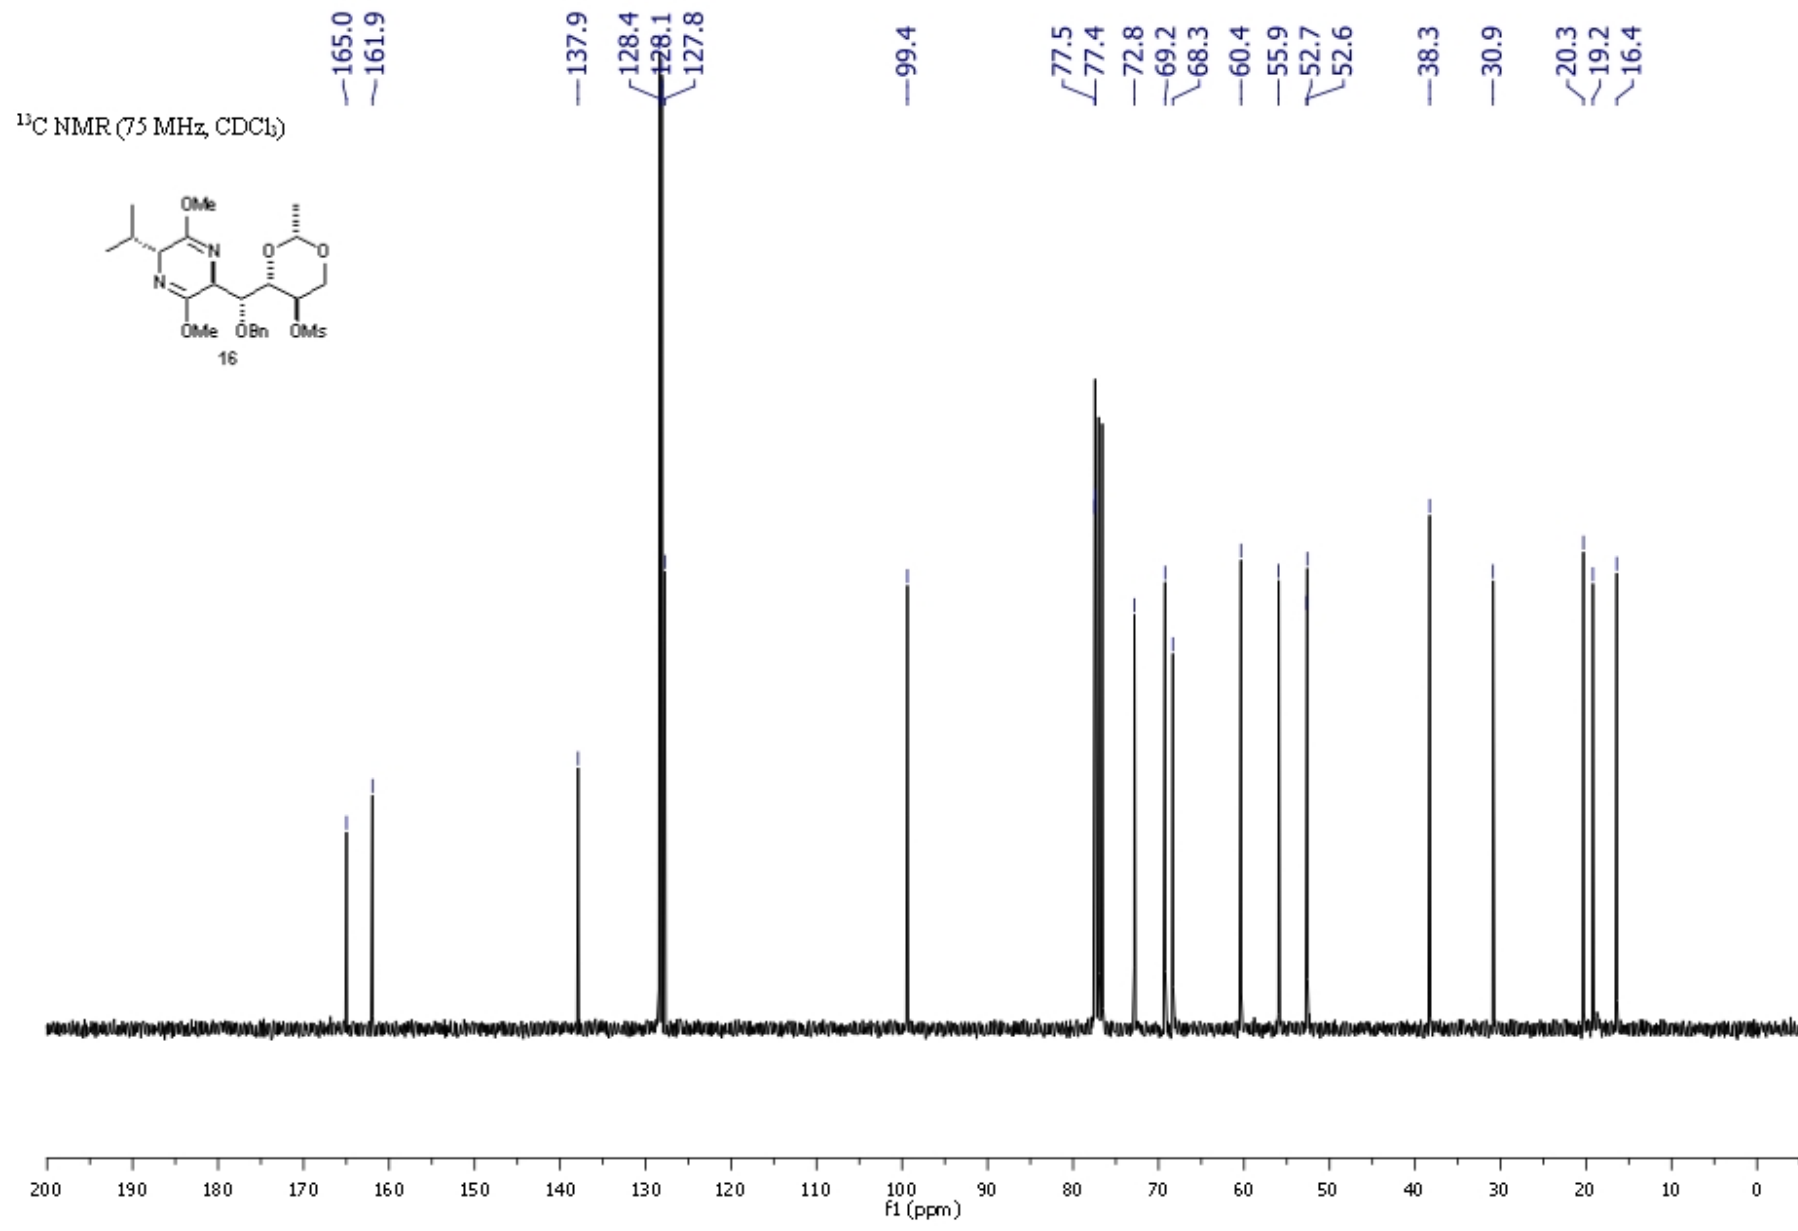

<sup>1</sup>H NMR (300 MHz, CDCl<sub>3</sub>)

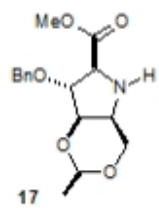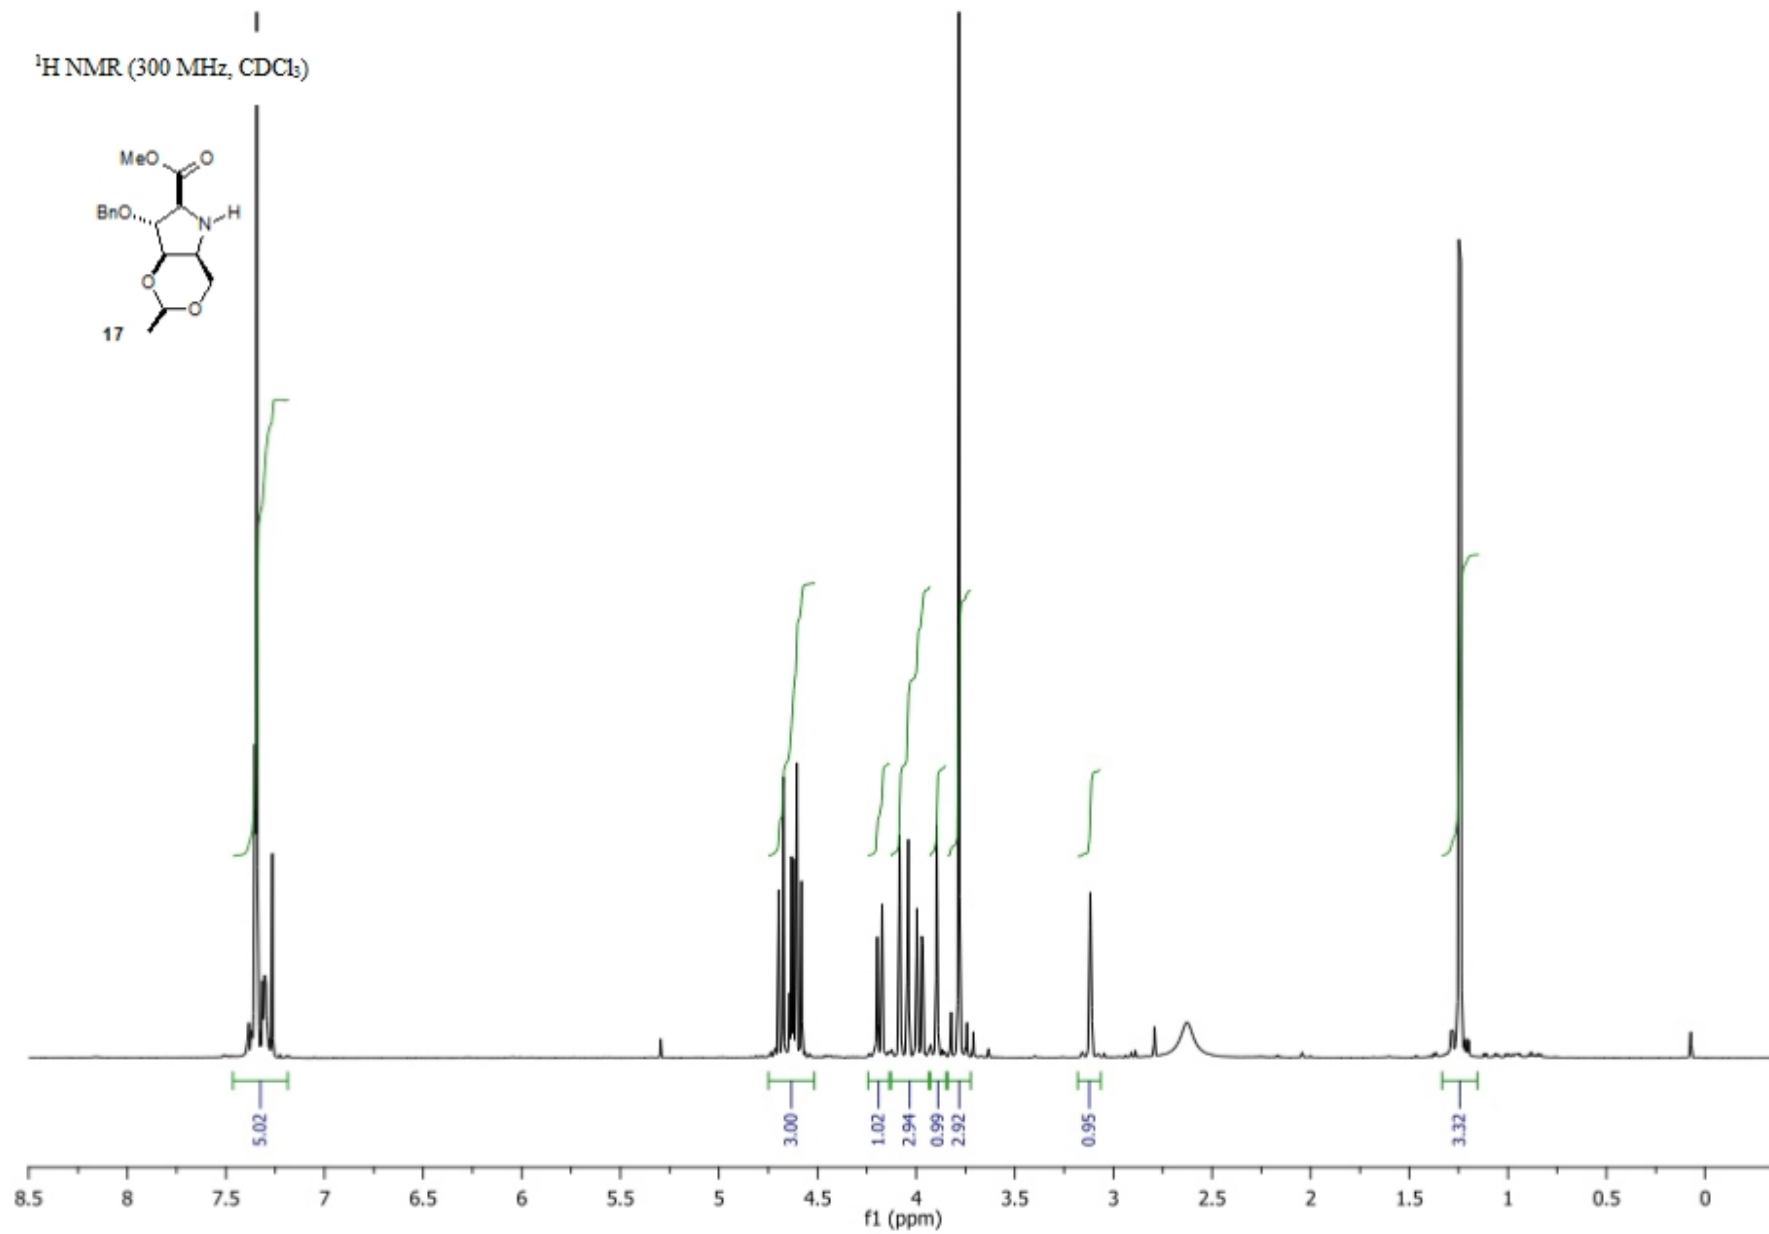

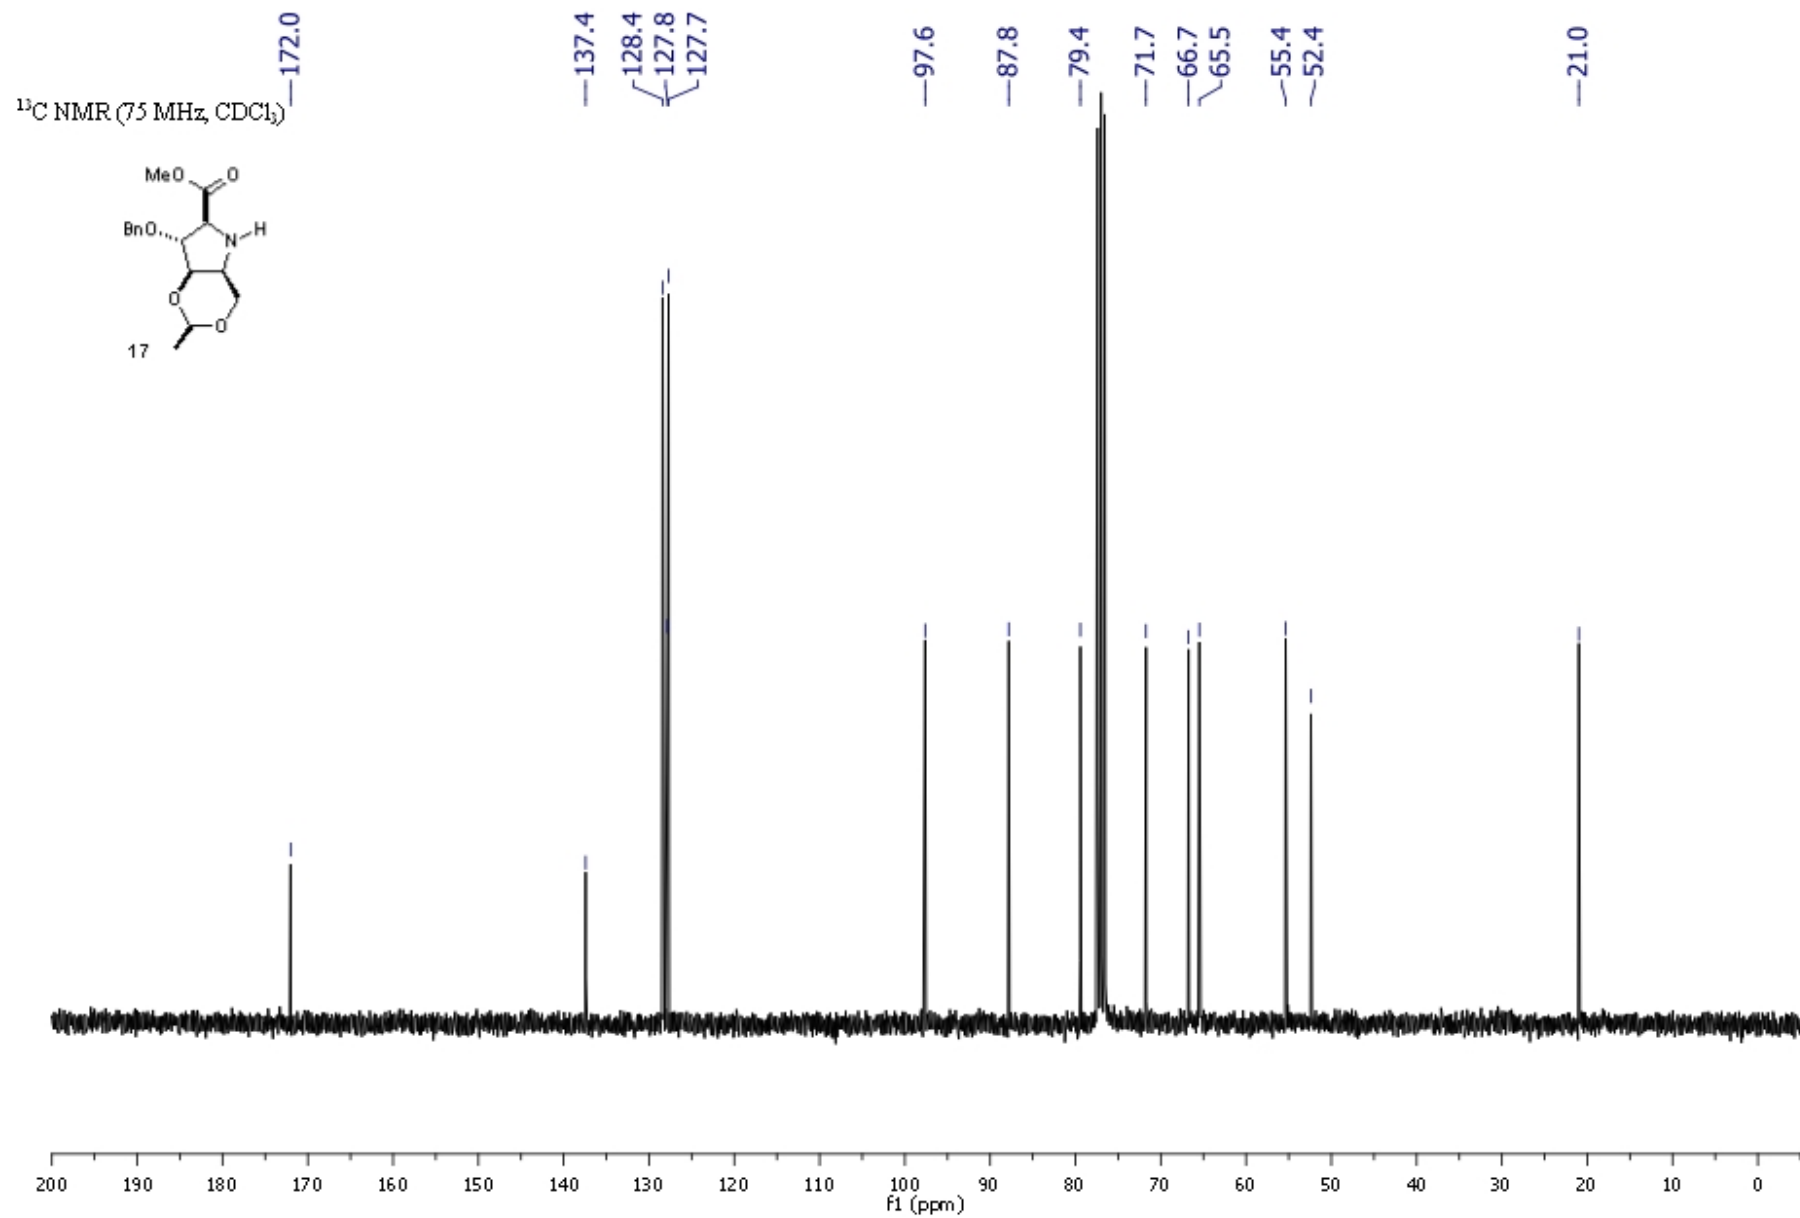



$^1\text{H}$  NMR (300 MHz,  $\text{CDCl}_3$ )

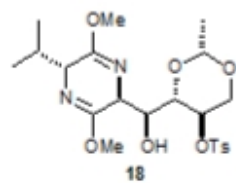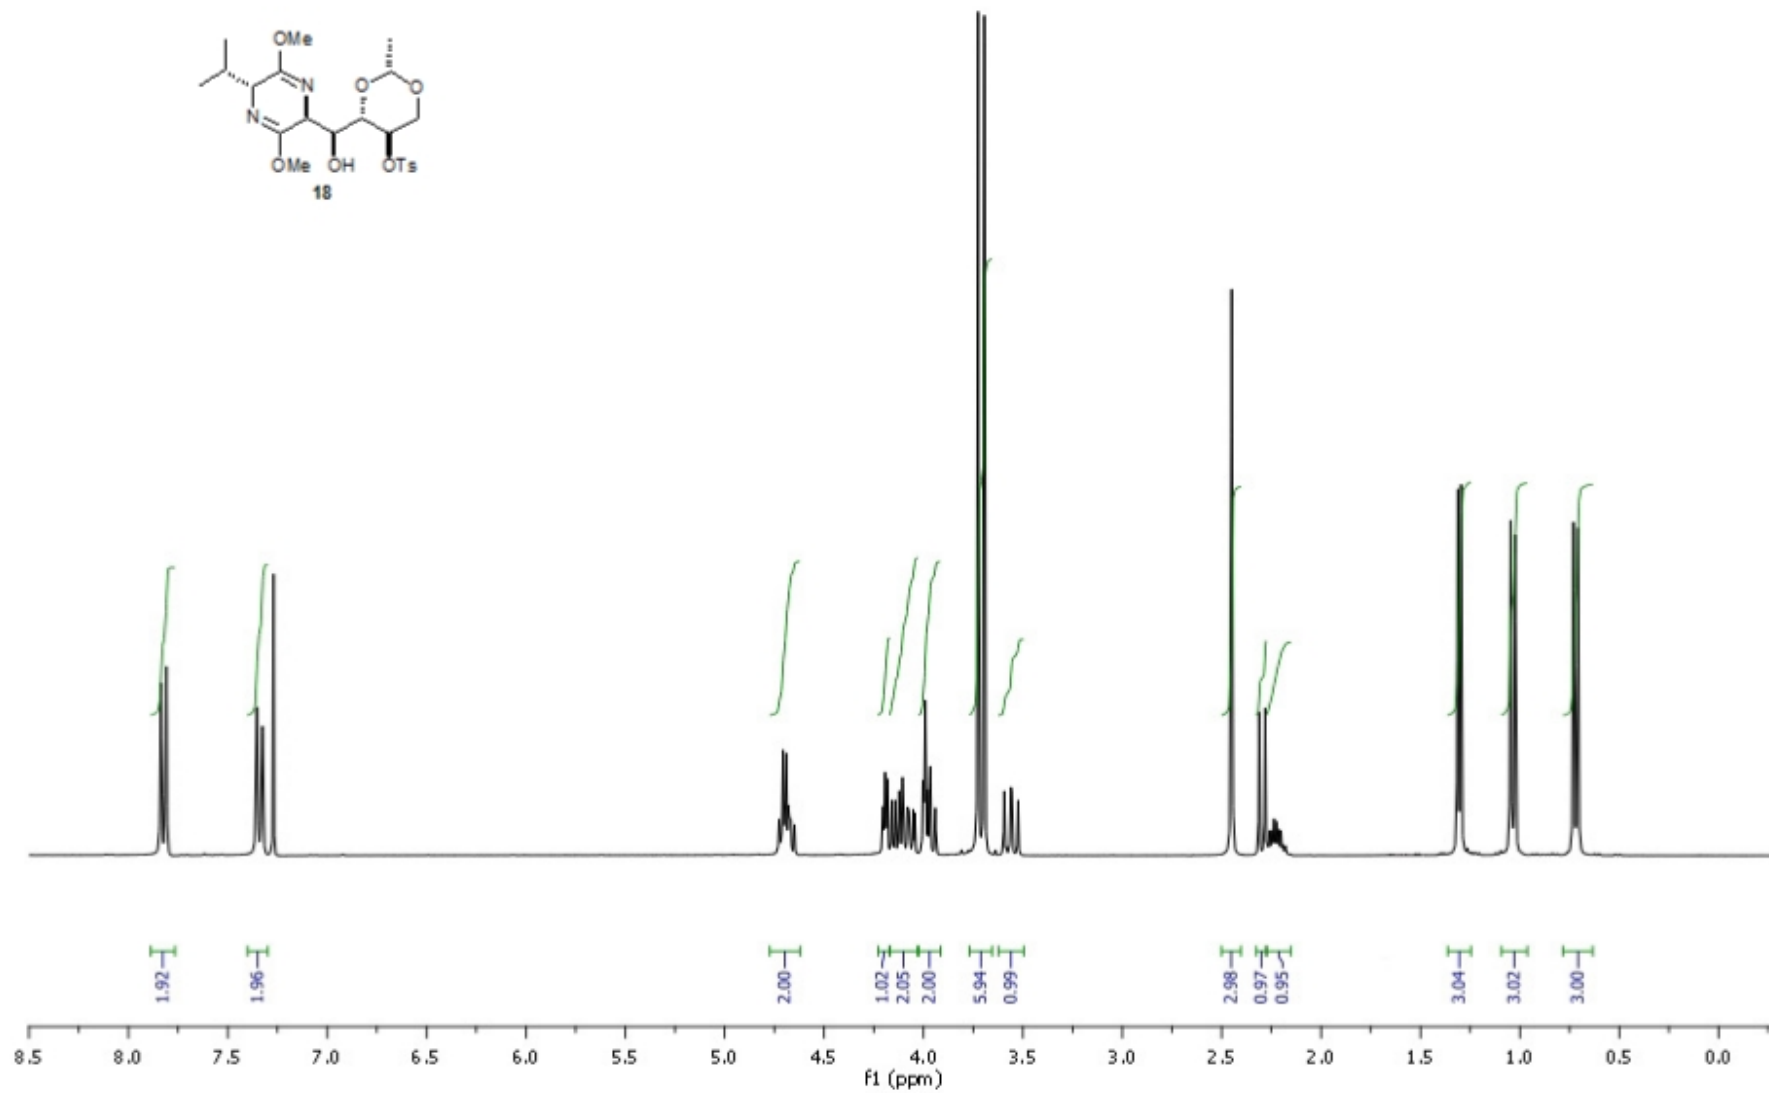

$^{13}\text{C}$  NMR (75 MHz,  $\text{CDCl}_3$ )

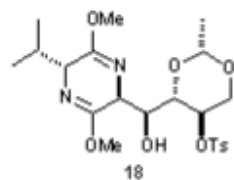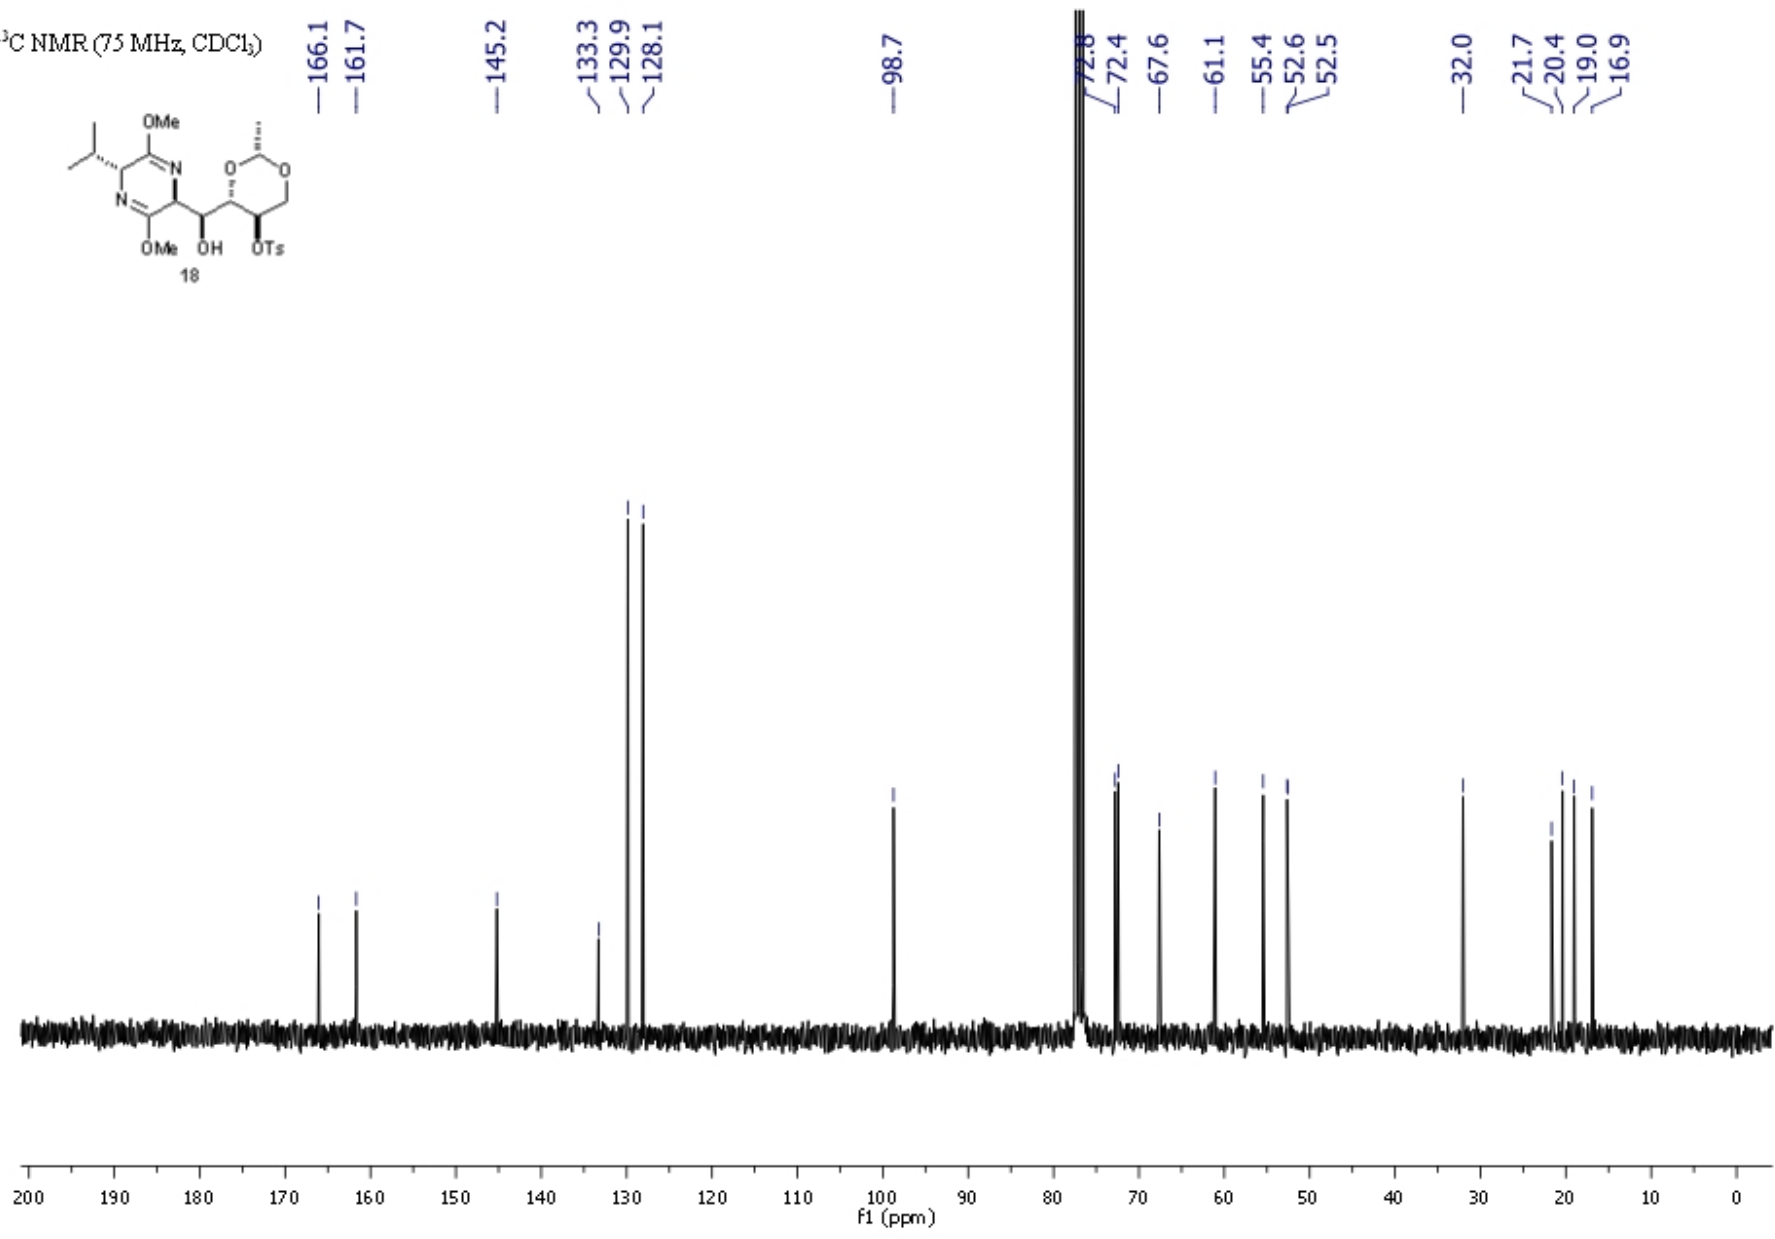

$^1\text{H}$  NMR (300 MHz,  $\text{CDCl}_3$ )

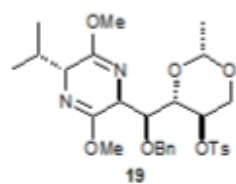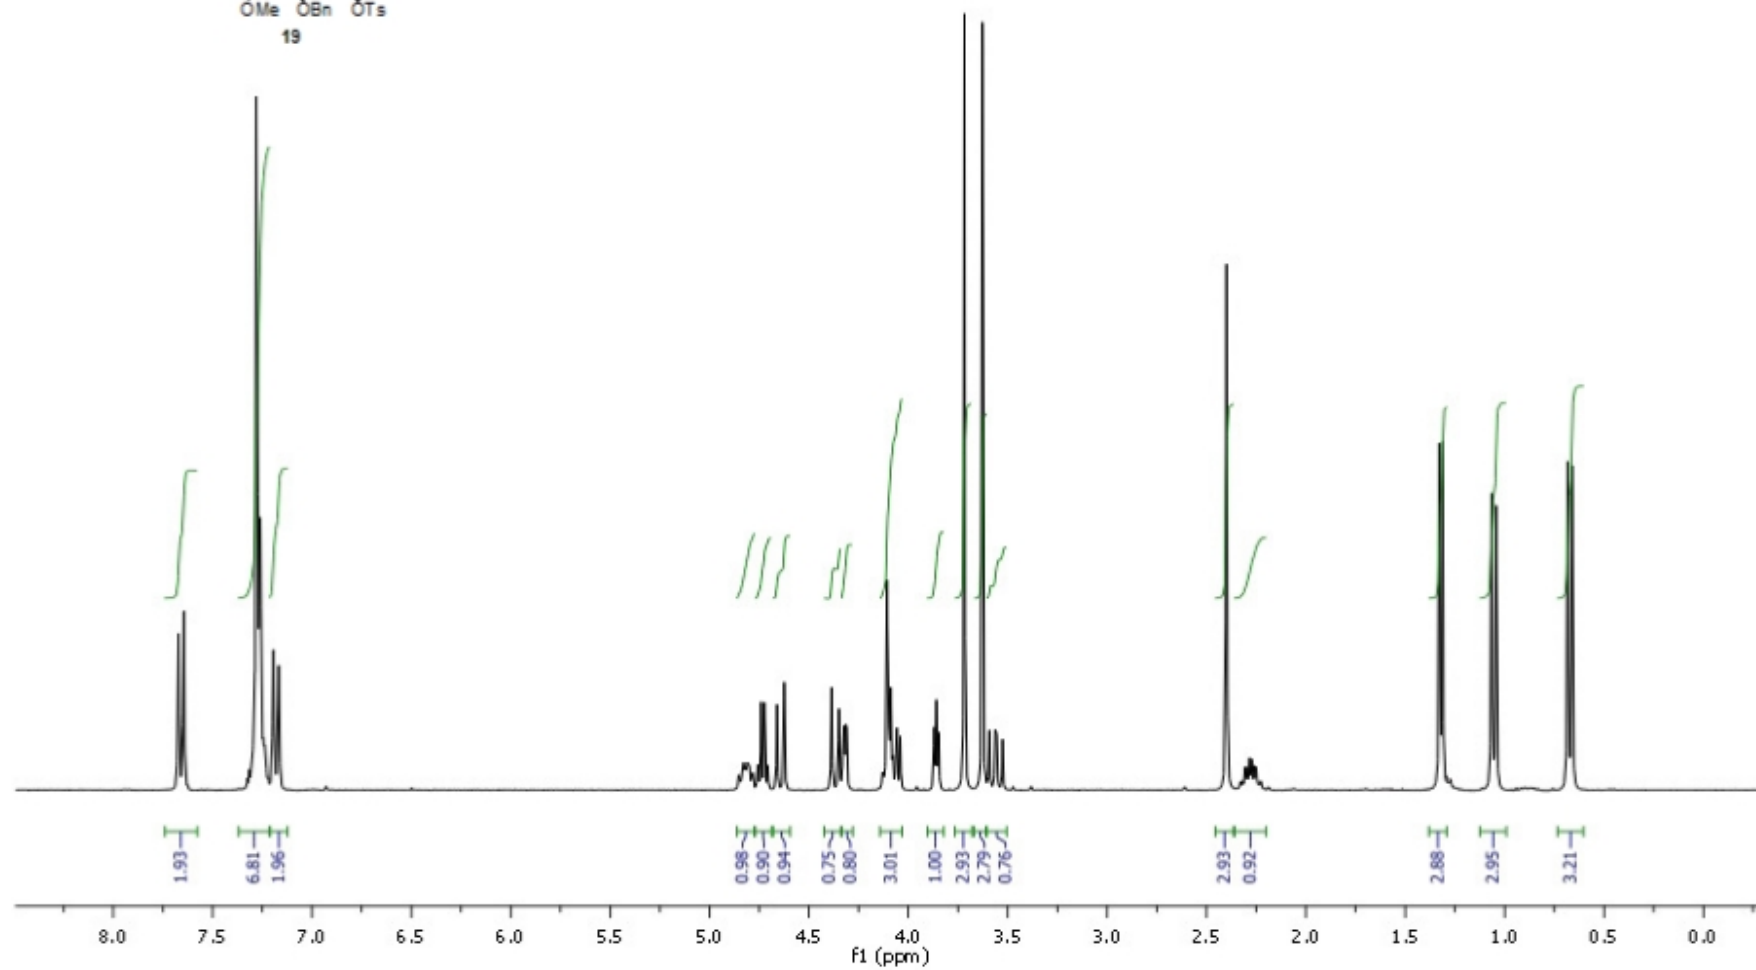

$^{13}\text{C}$  NMR (75 MHz,  $\text{CDCl}_3$ )

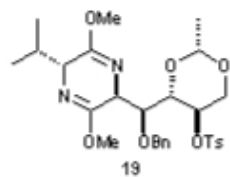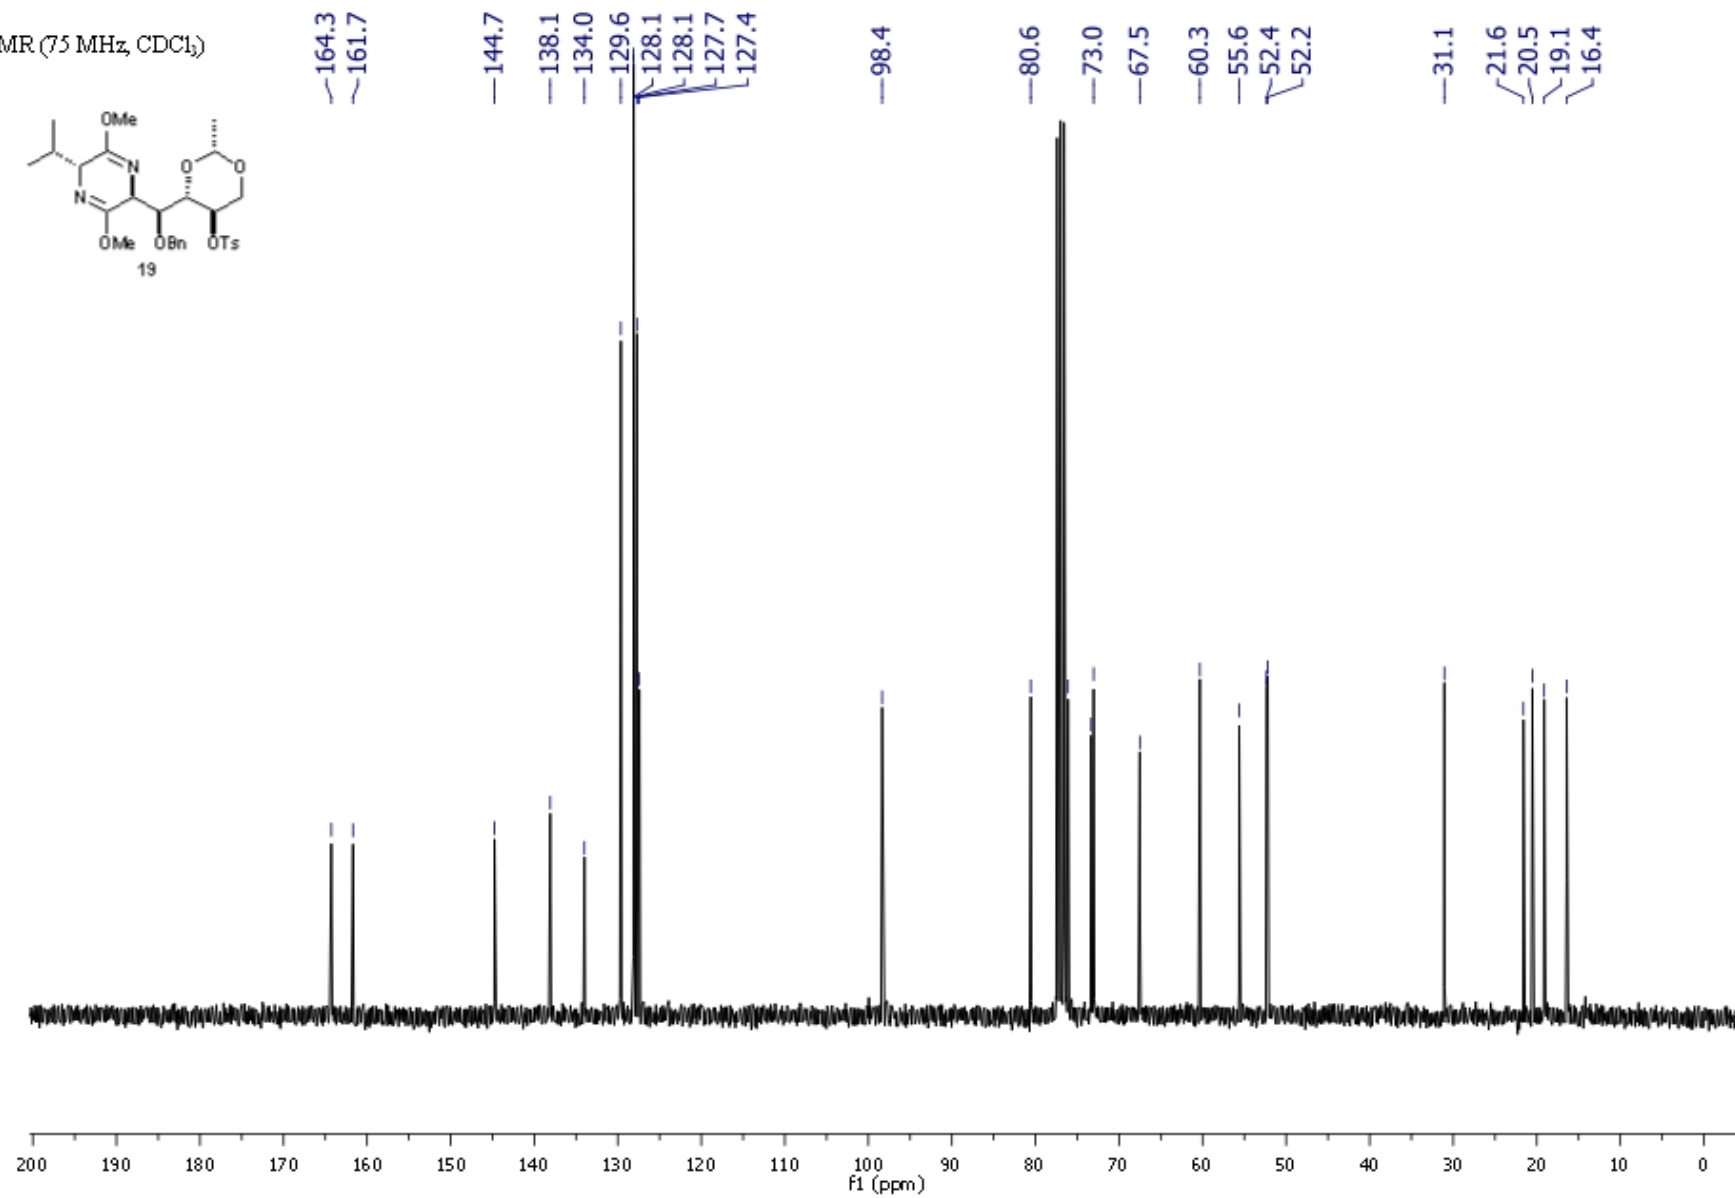

$^1\text{H}$  NMR (300 MHz,  $\text{CDCl}_3$ )

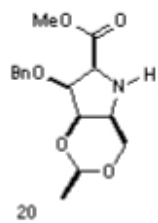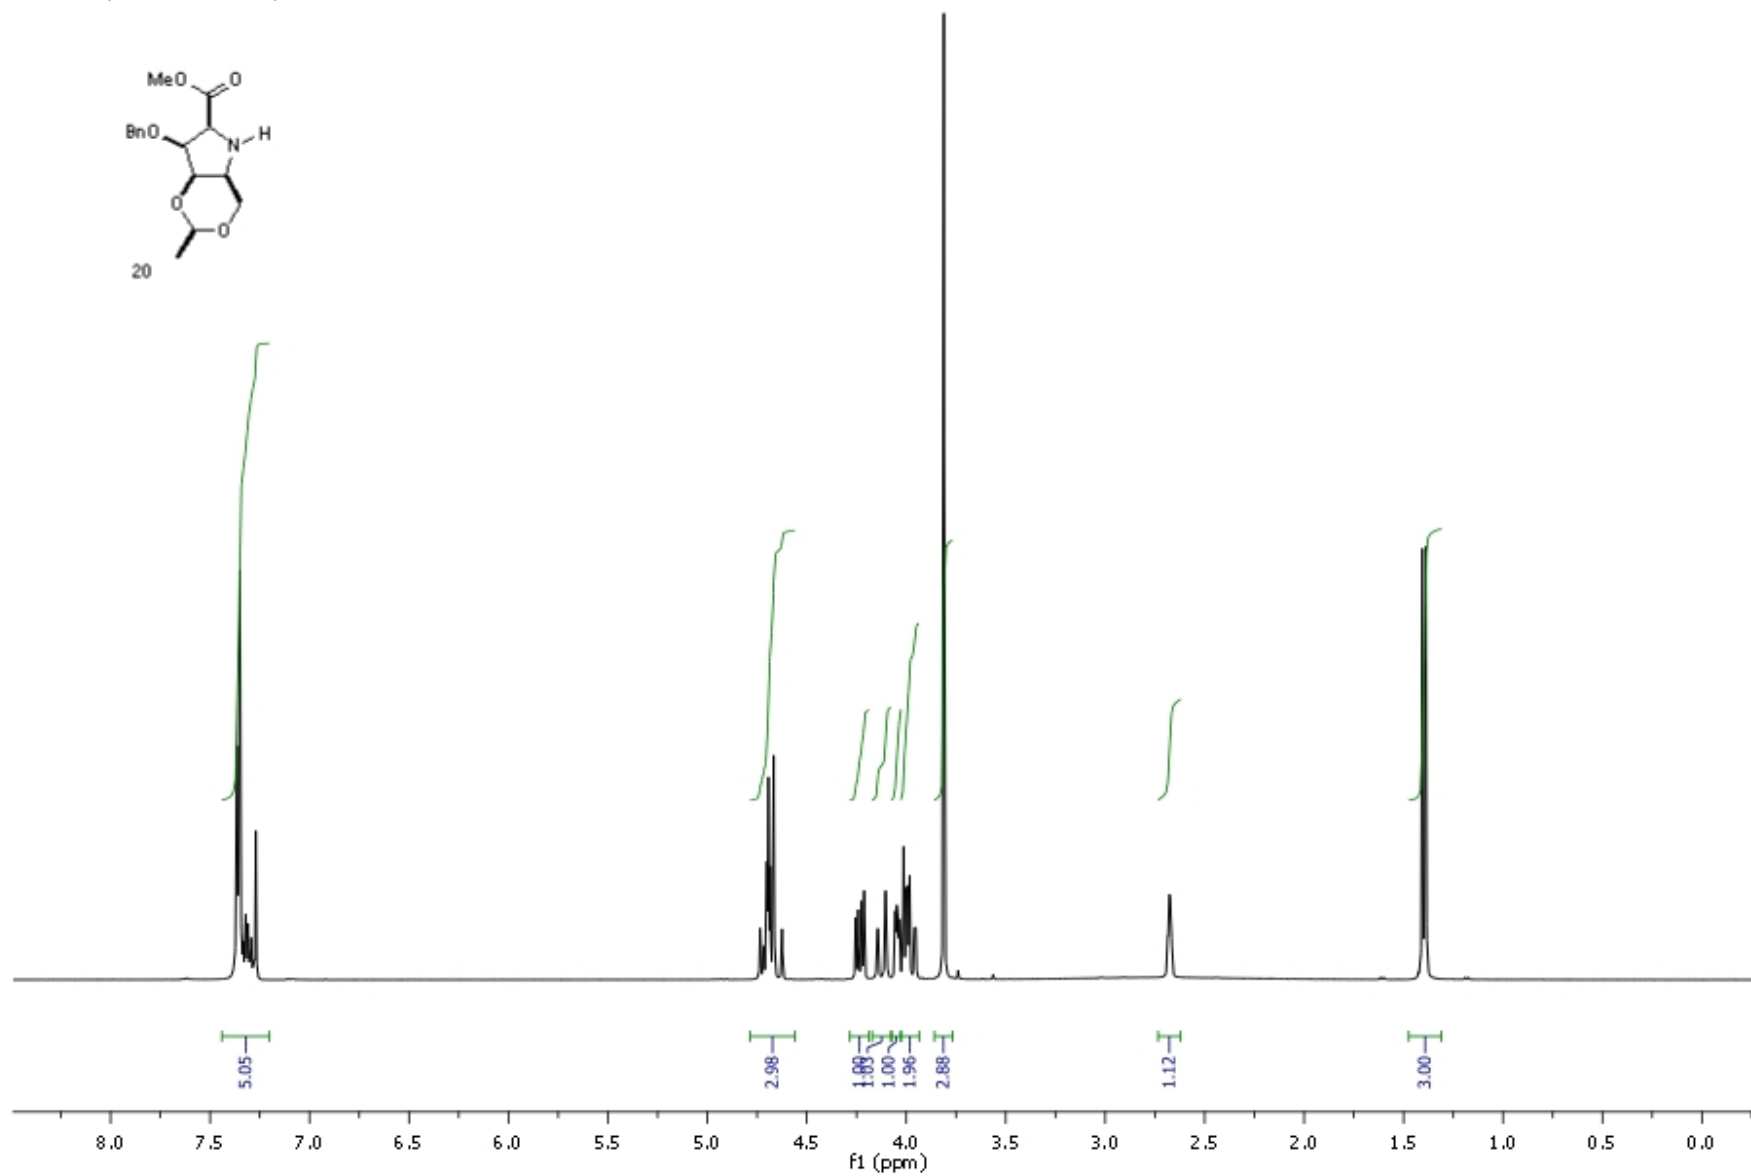

$^{13}\text{C}$  NMR (75 MHz,  $\text{CDCl}_3$ )

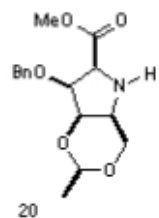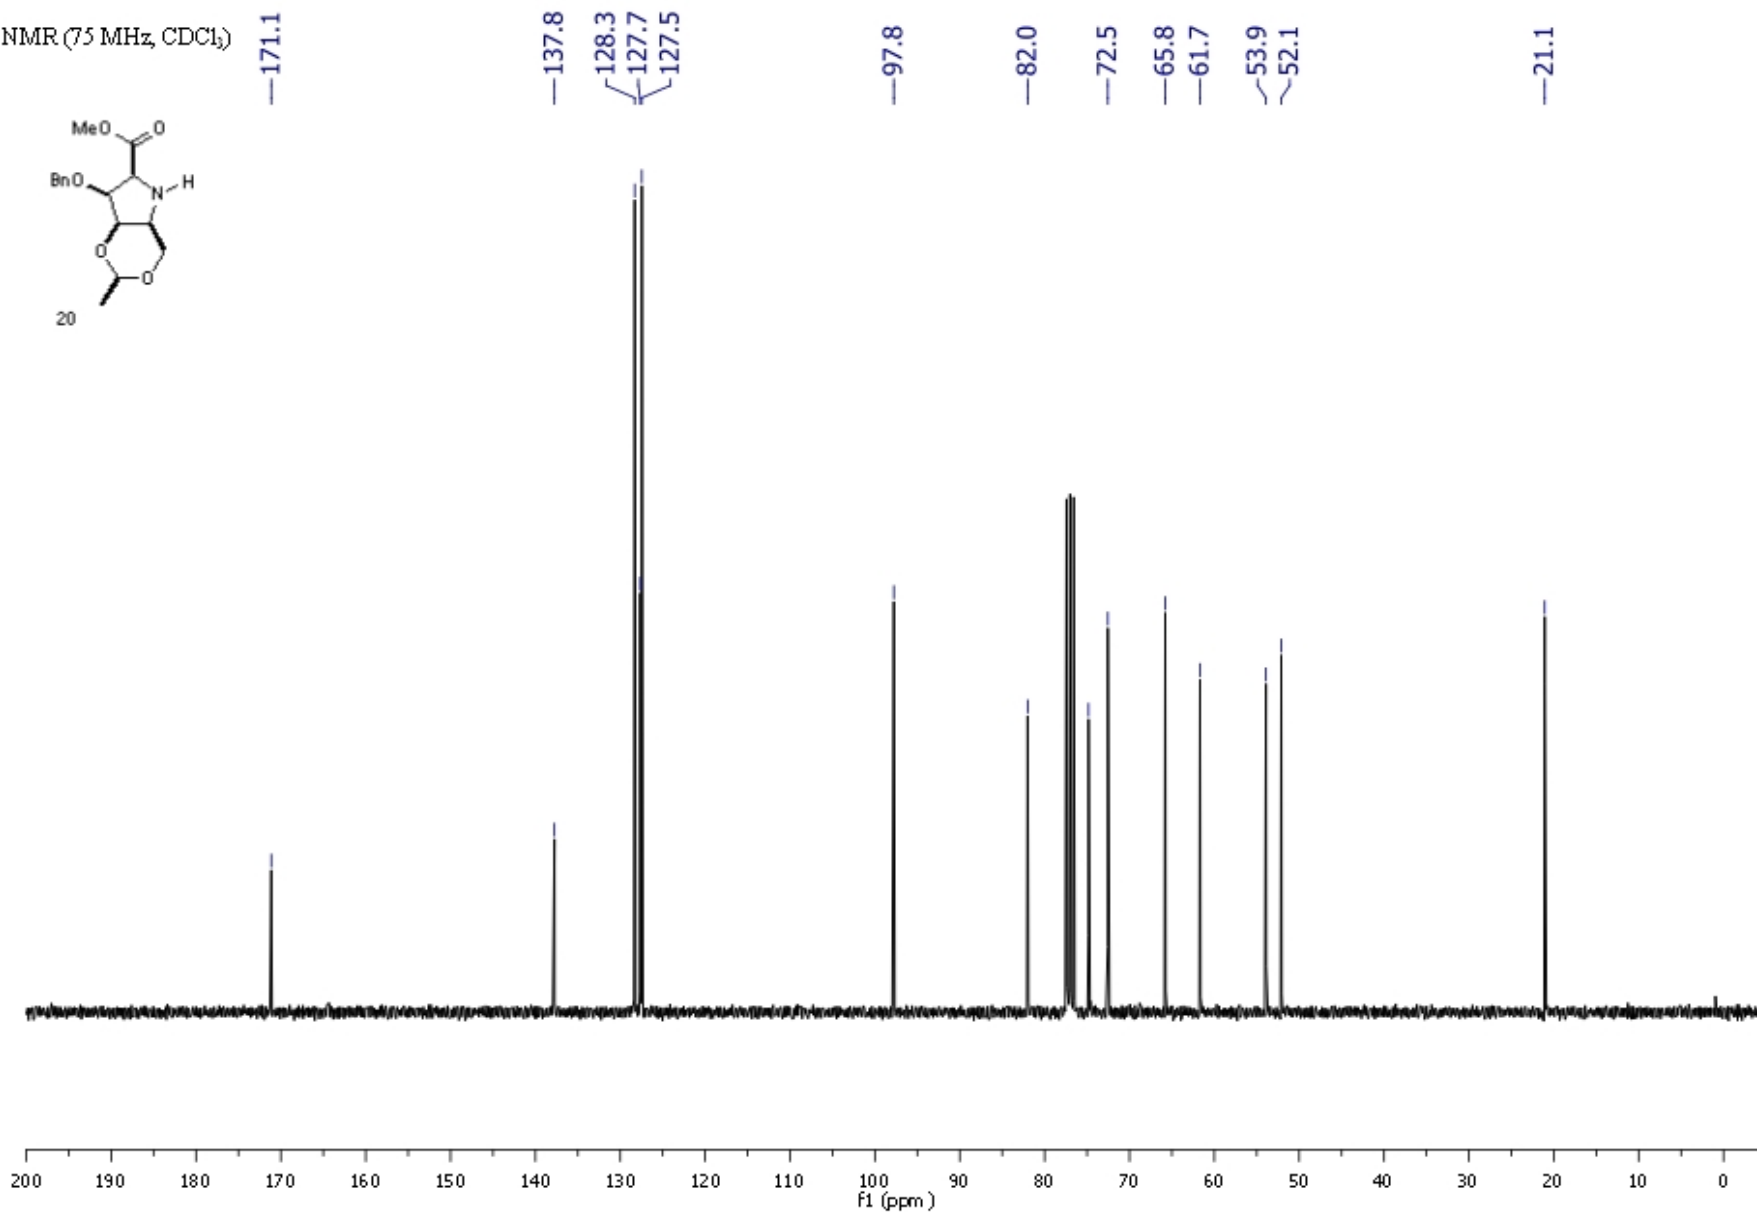

$^1\text{H}$  NMR (300 MHz,  $\text{CDCl}_3$ )

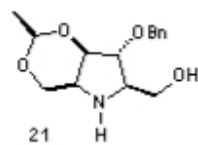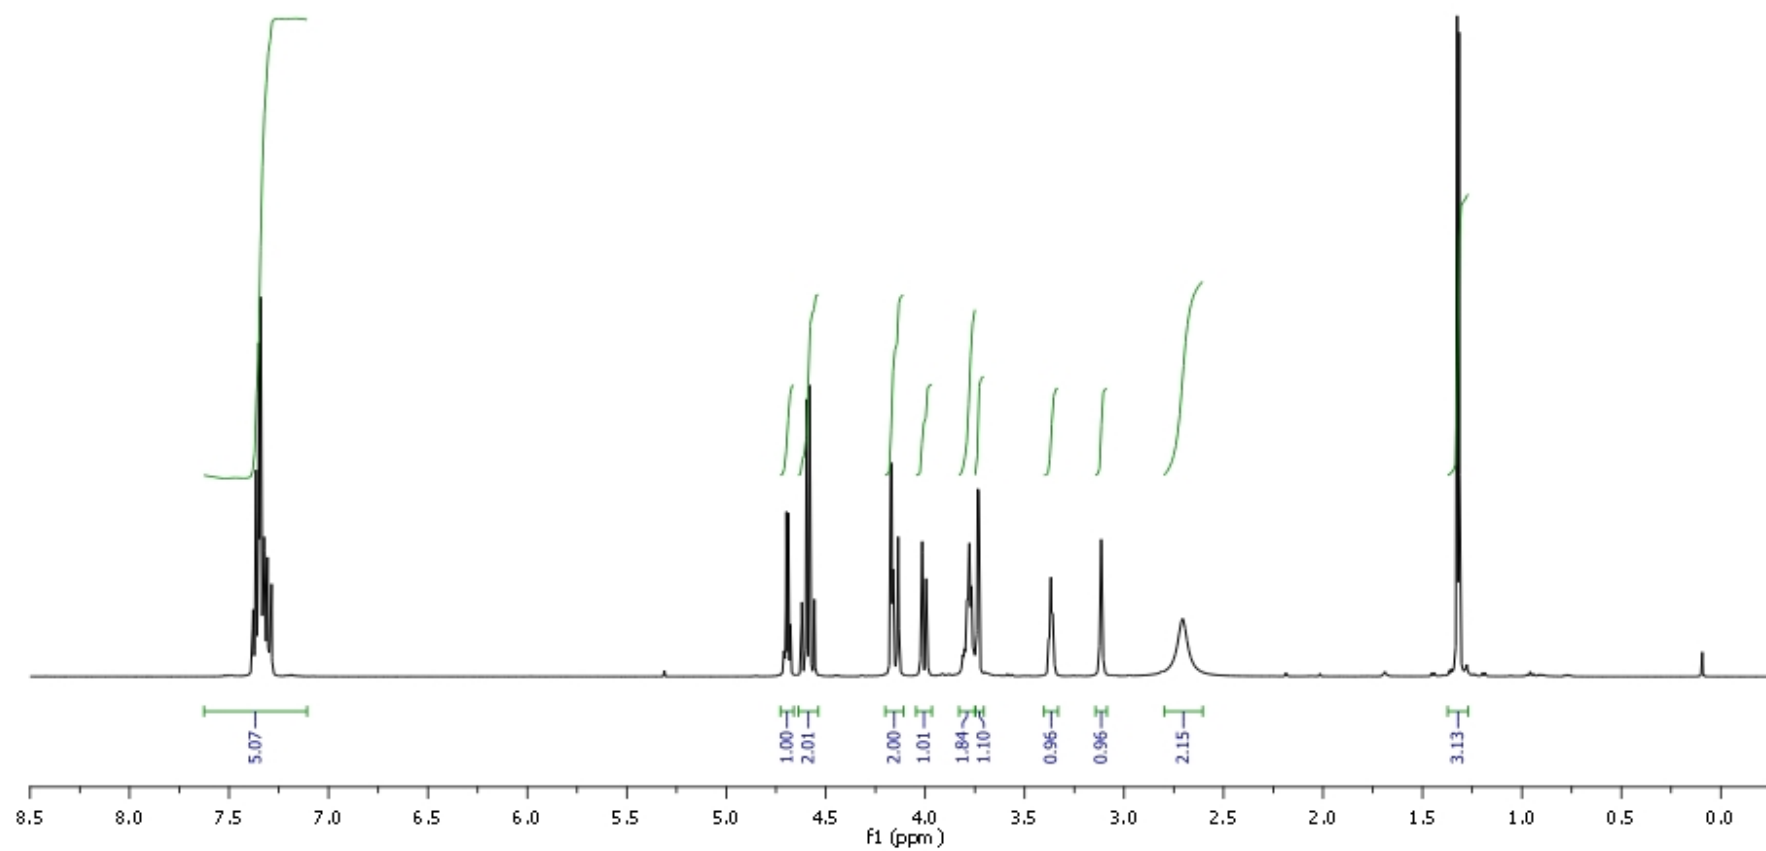

$^{13}\text{C}$  NMR (75 MHz,  $\text{CDCl}_3$ )

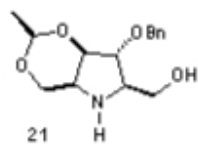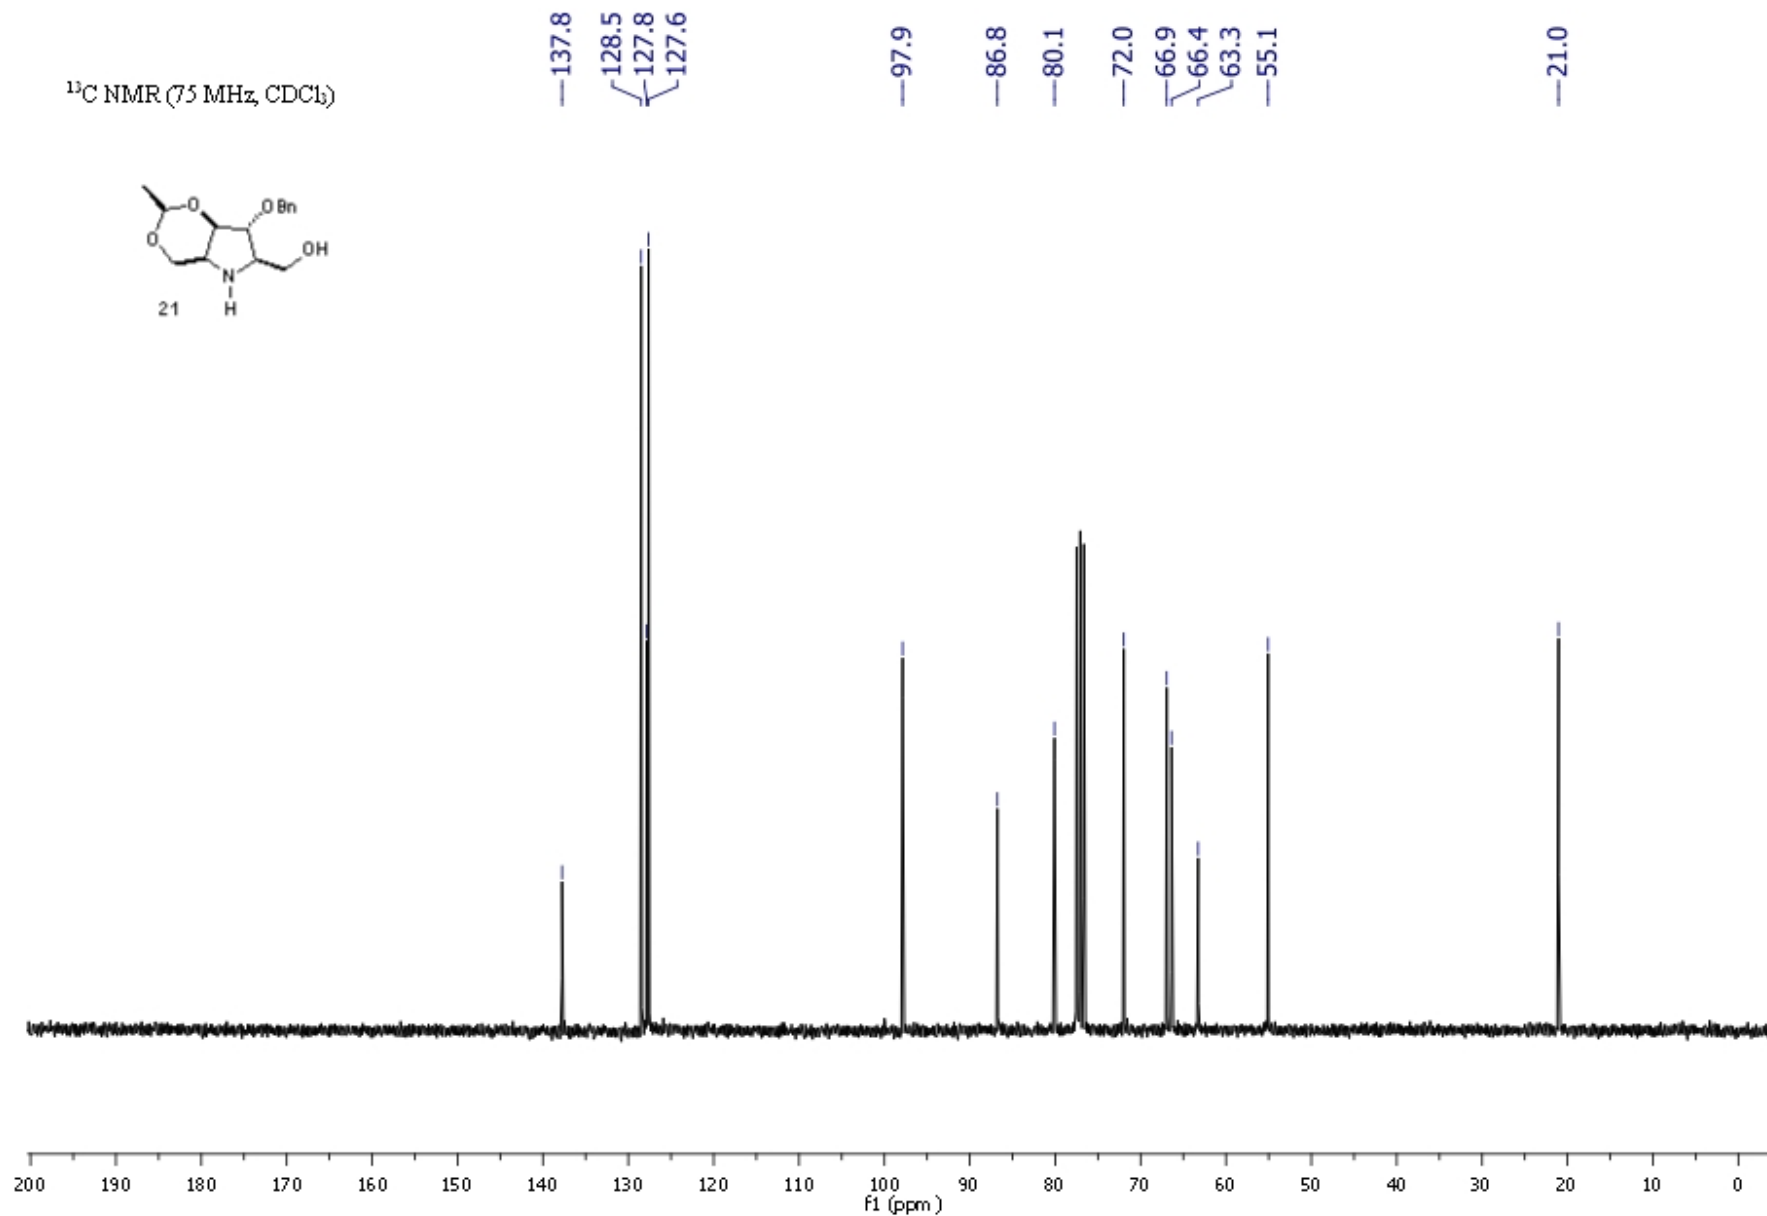



$^1\text{H}$  NMR (300 MHz,  $\text{CDCl}_3$ )

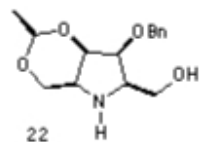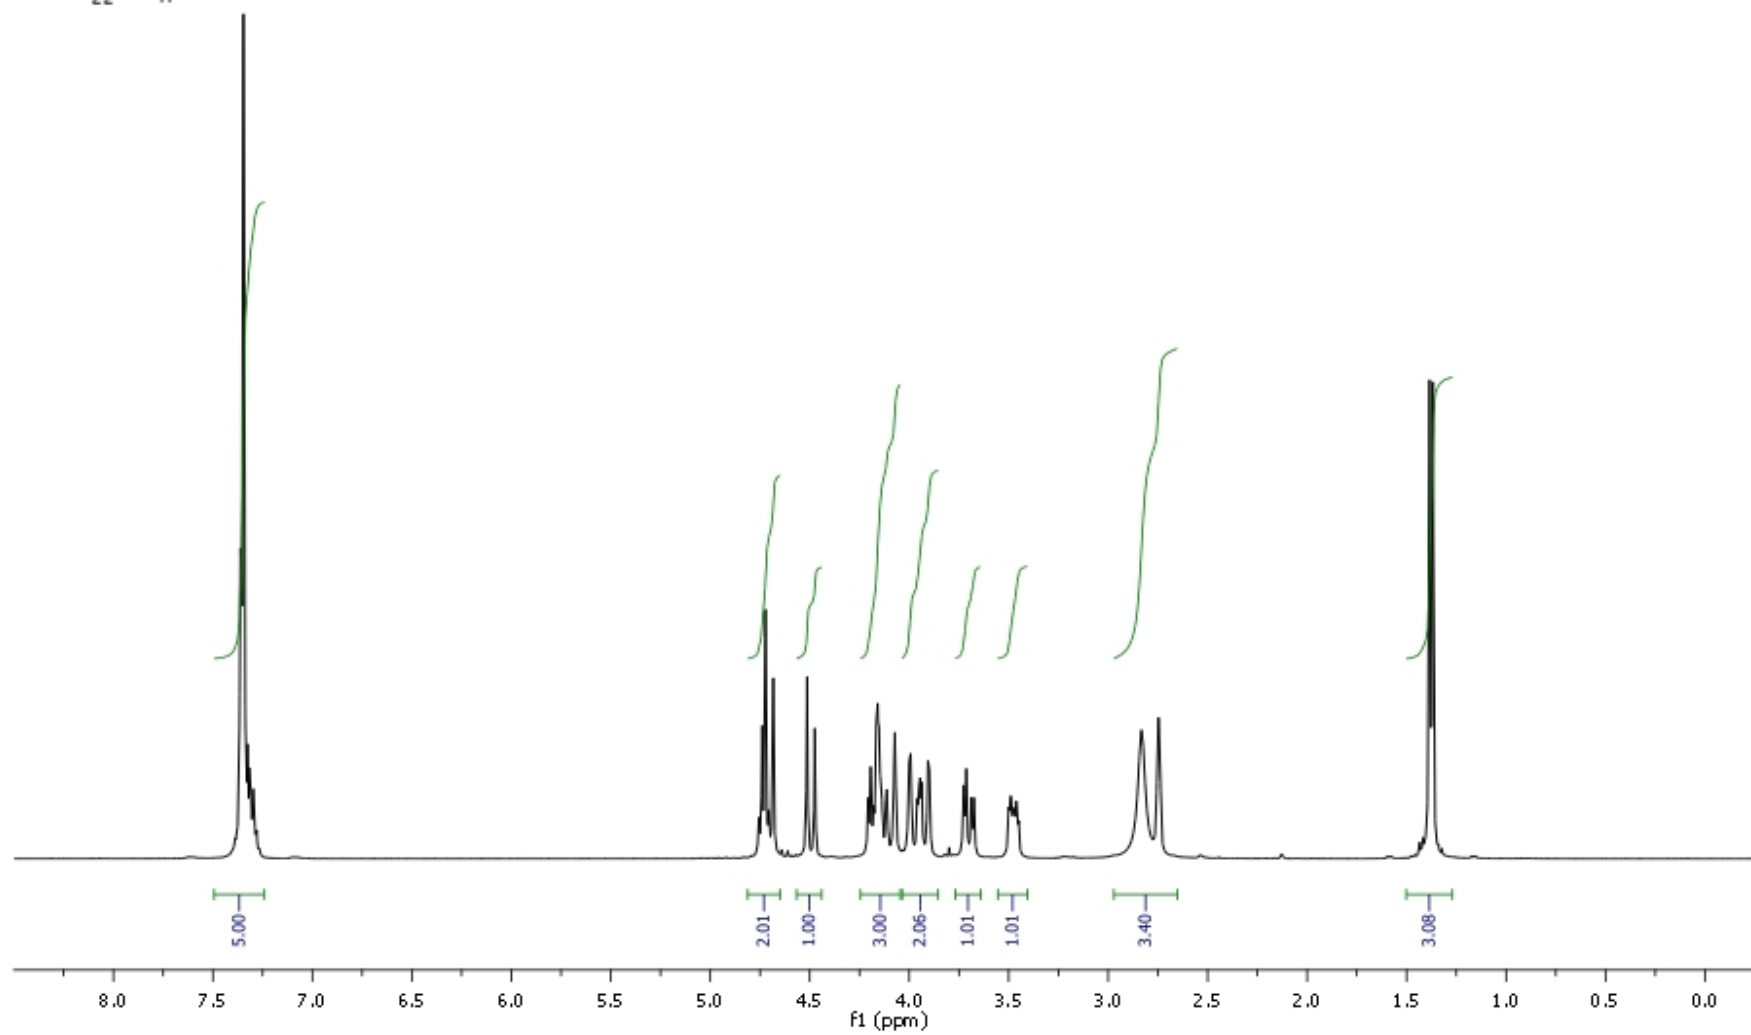

$^{13}\text{C}$  NMR (75 MHz,  $\text{CDCl}_3$ )

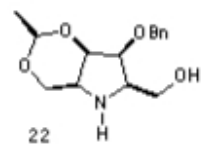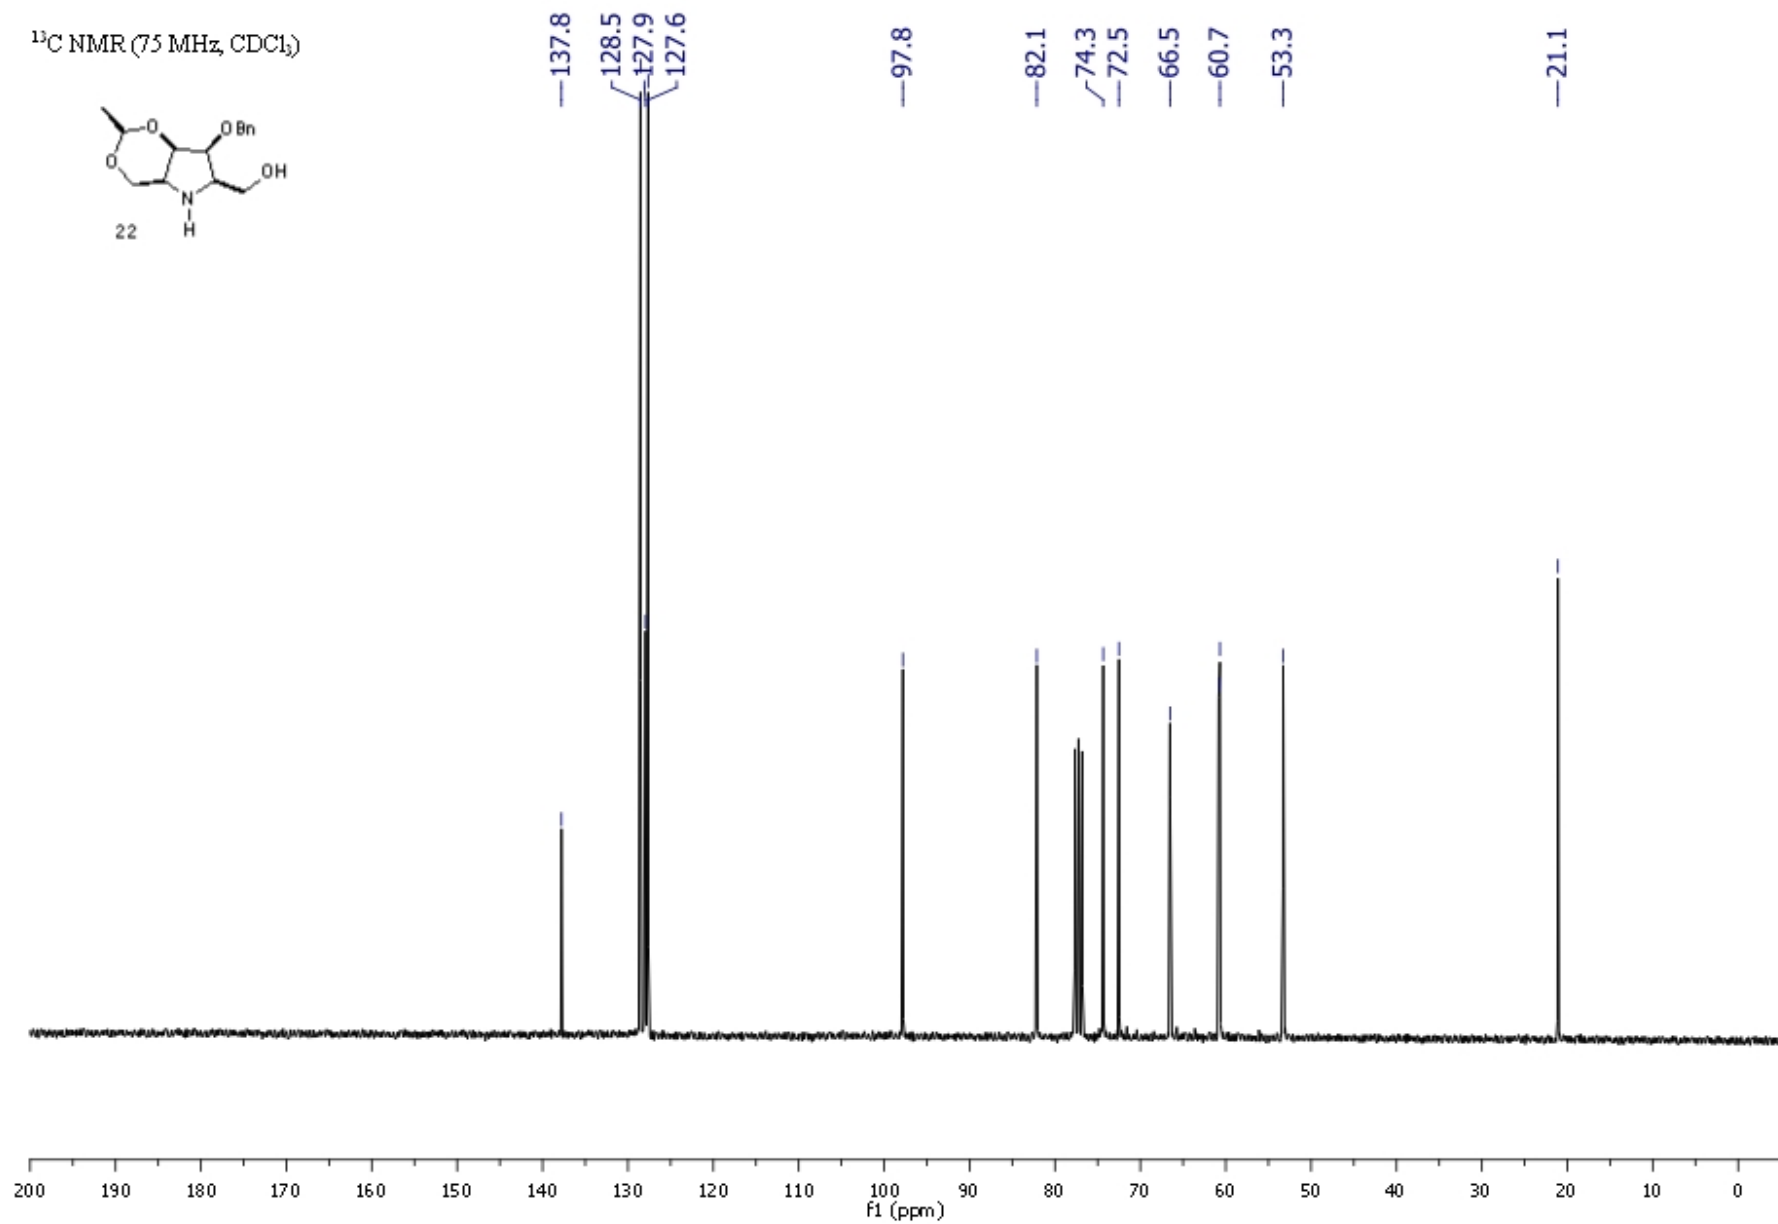

$^1\text{H}$  NMR (300 MHz,  $\text{D}_2\text{O}$ )

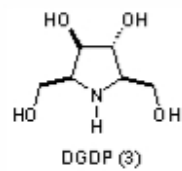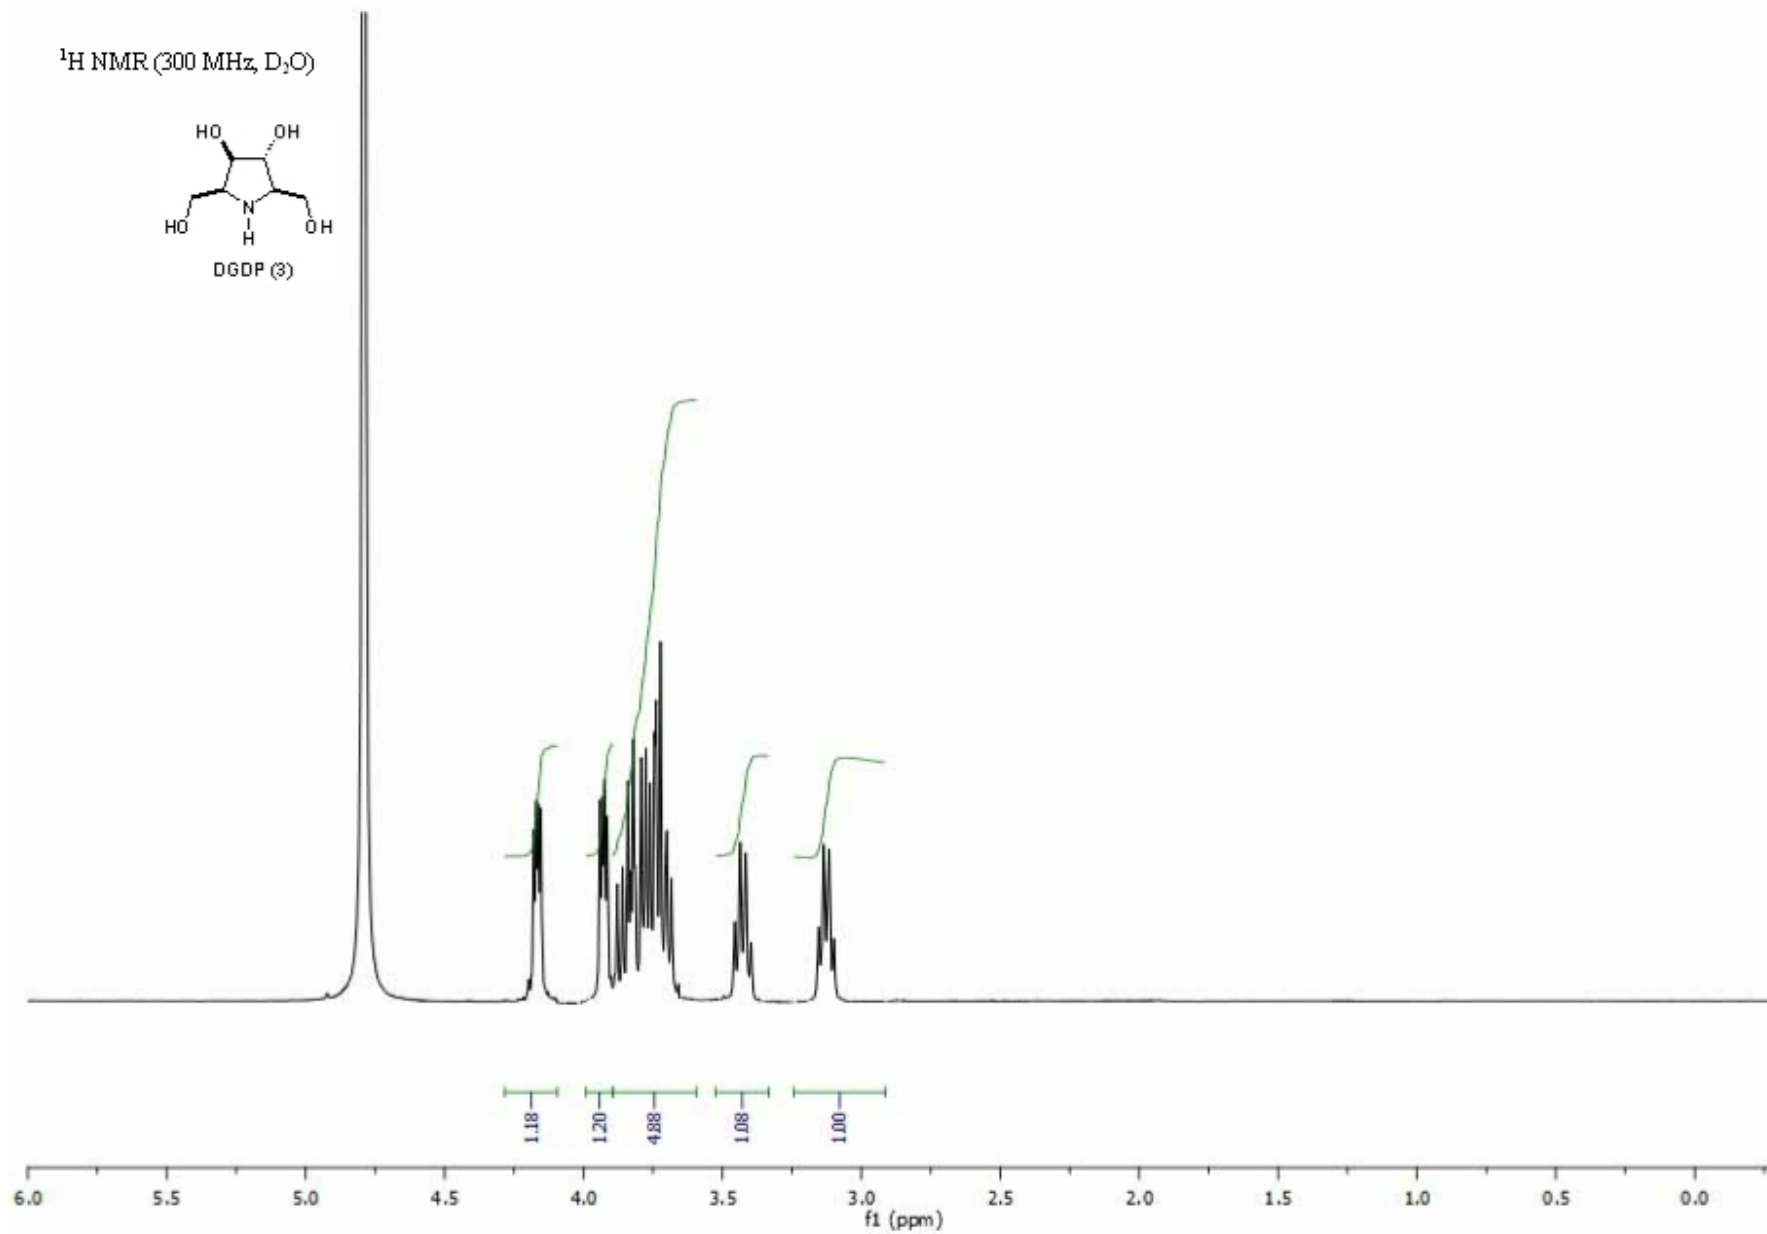

$^{13}\text{C}$  NMR (75 MHz,  $\text{D}_2\text{O}$ )

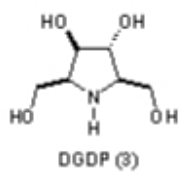

81.8  
80.1  
68.1  
64.9  
62.8

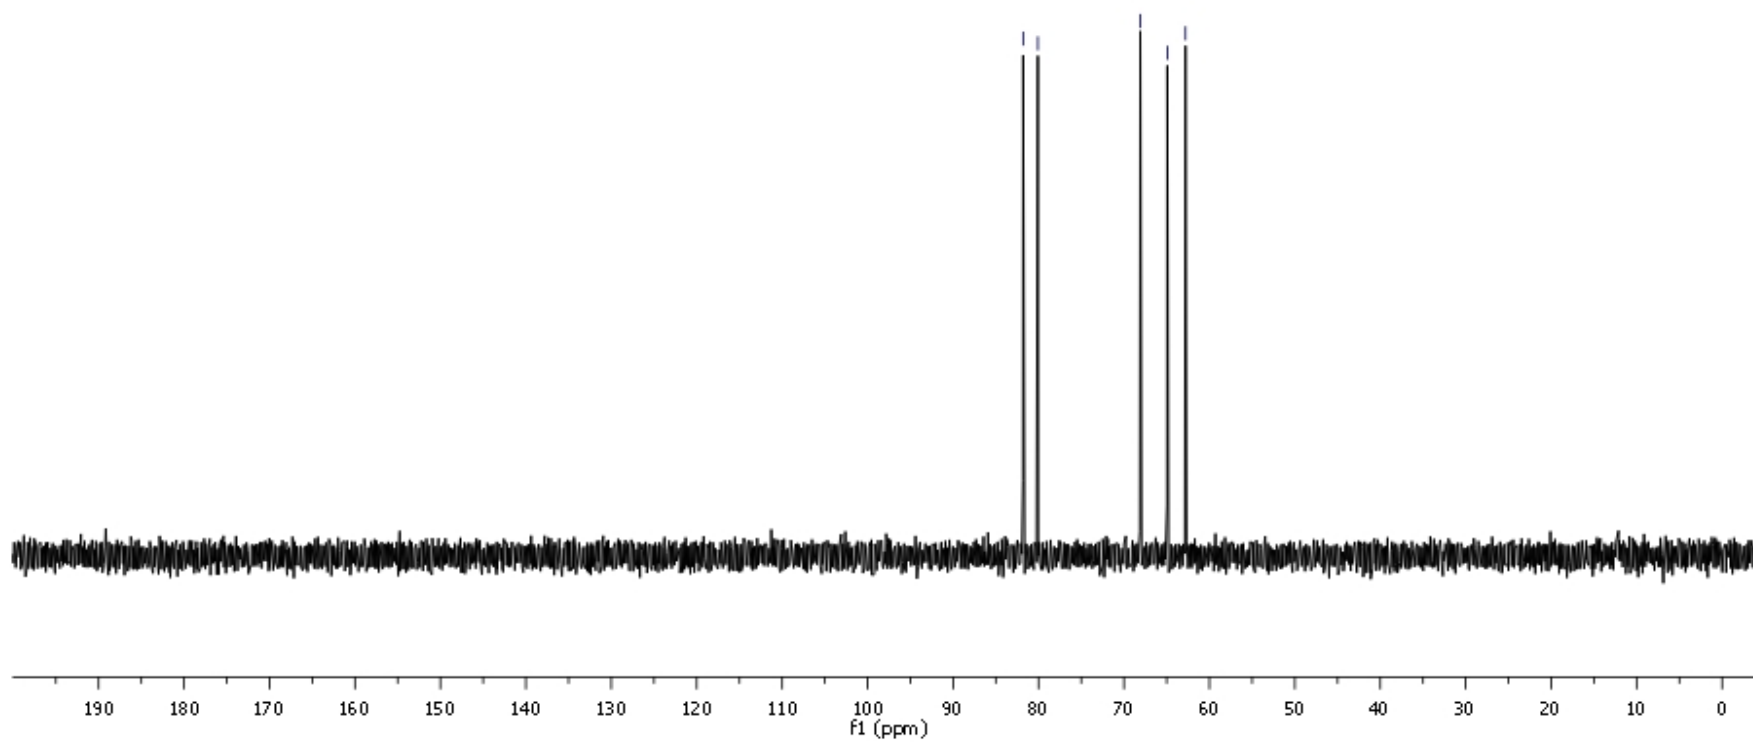

$^1\text{H}$  NMR (300 MHz,  $\text{D}_2\text{O}$ )

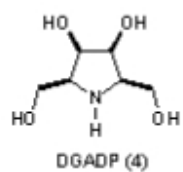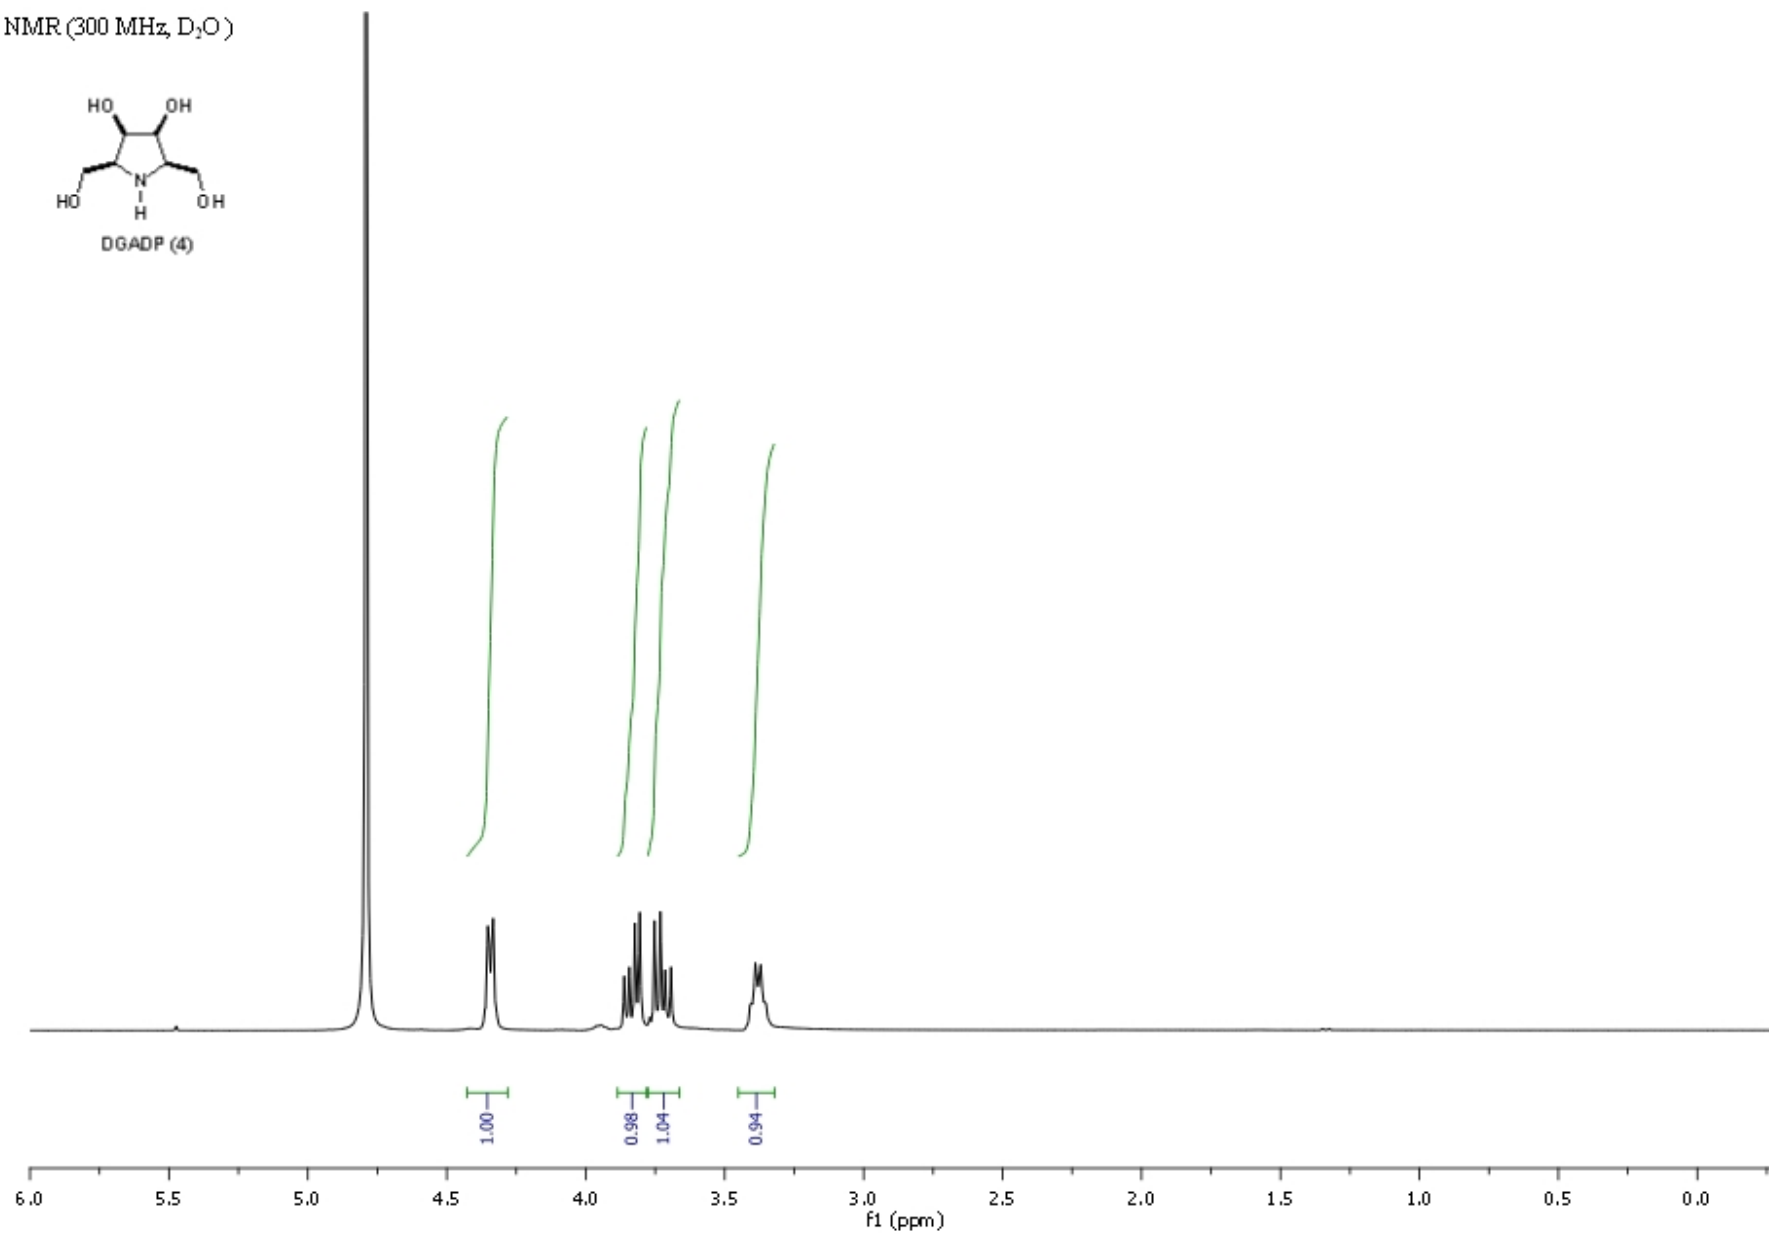

$^{13}\text{C}$  NMR (75 MHz,  $\text{D}_2\text{O}$ )

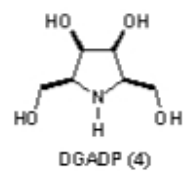

—72.4  
—63.6  
—60.2

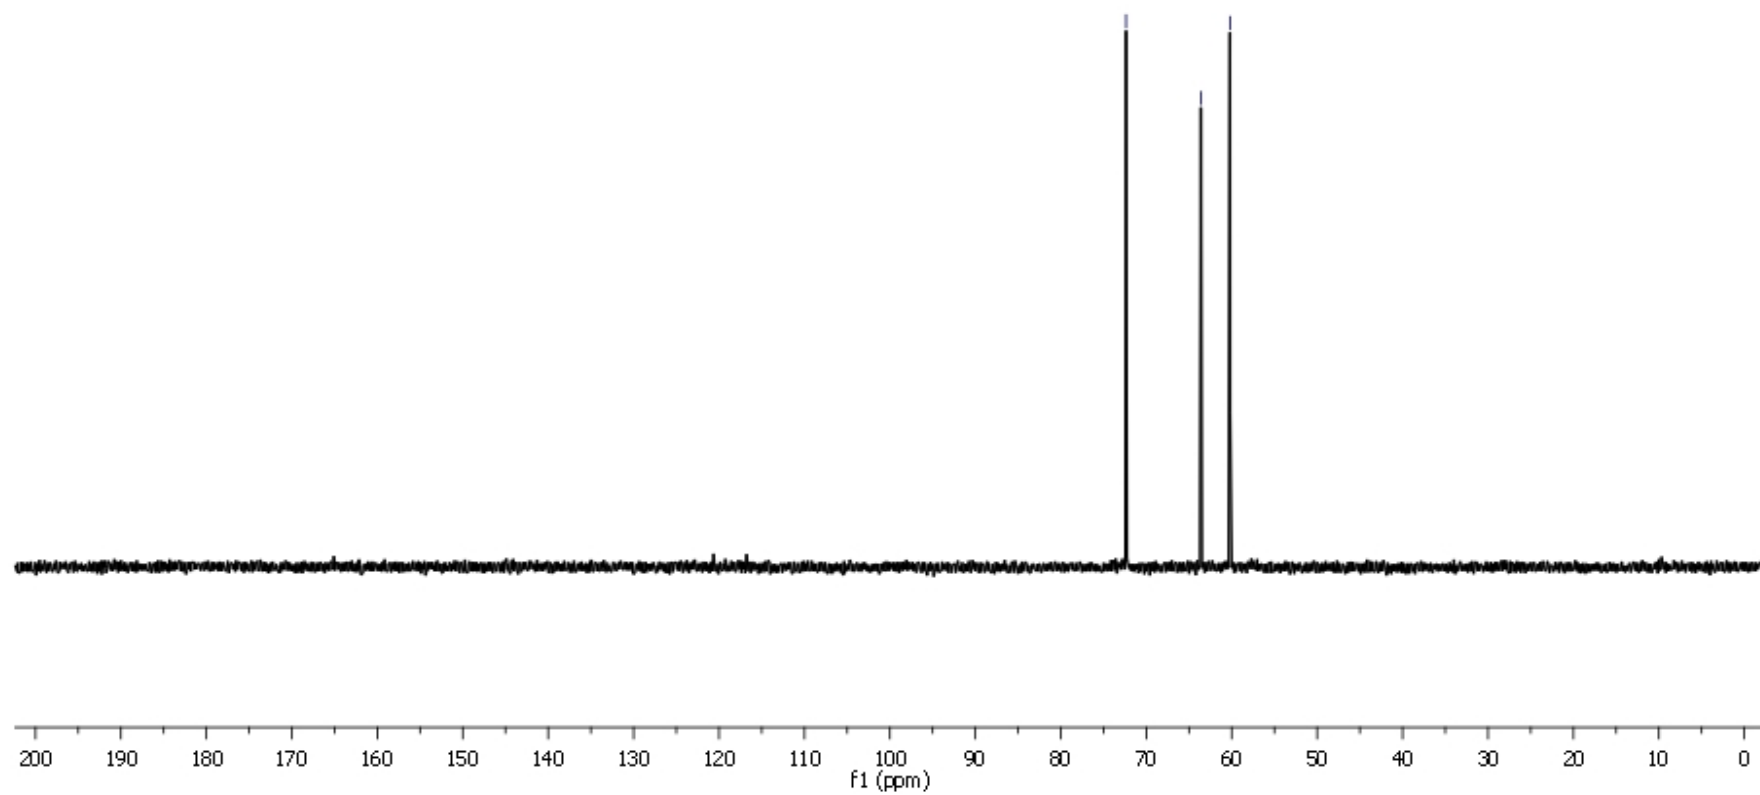

$^1\text{H}$  NMR (500 MHz,  $\text{D}_2\text{O} + \text{DCI}$ )

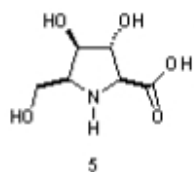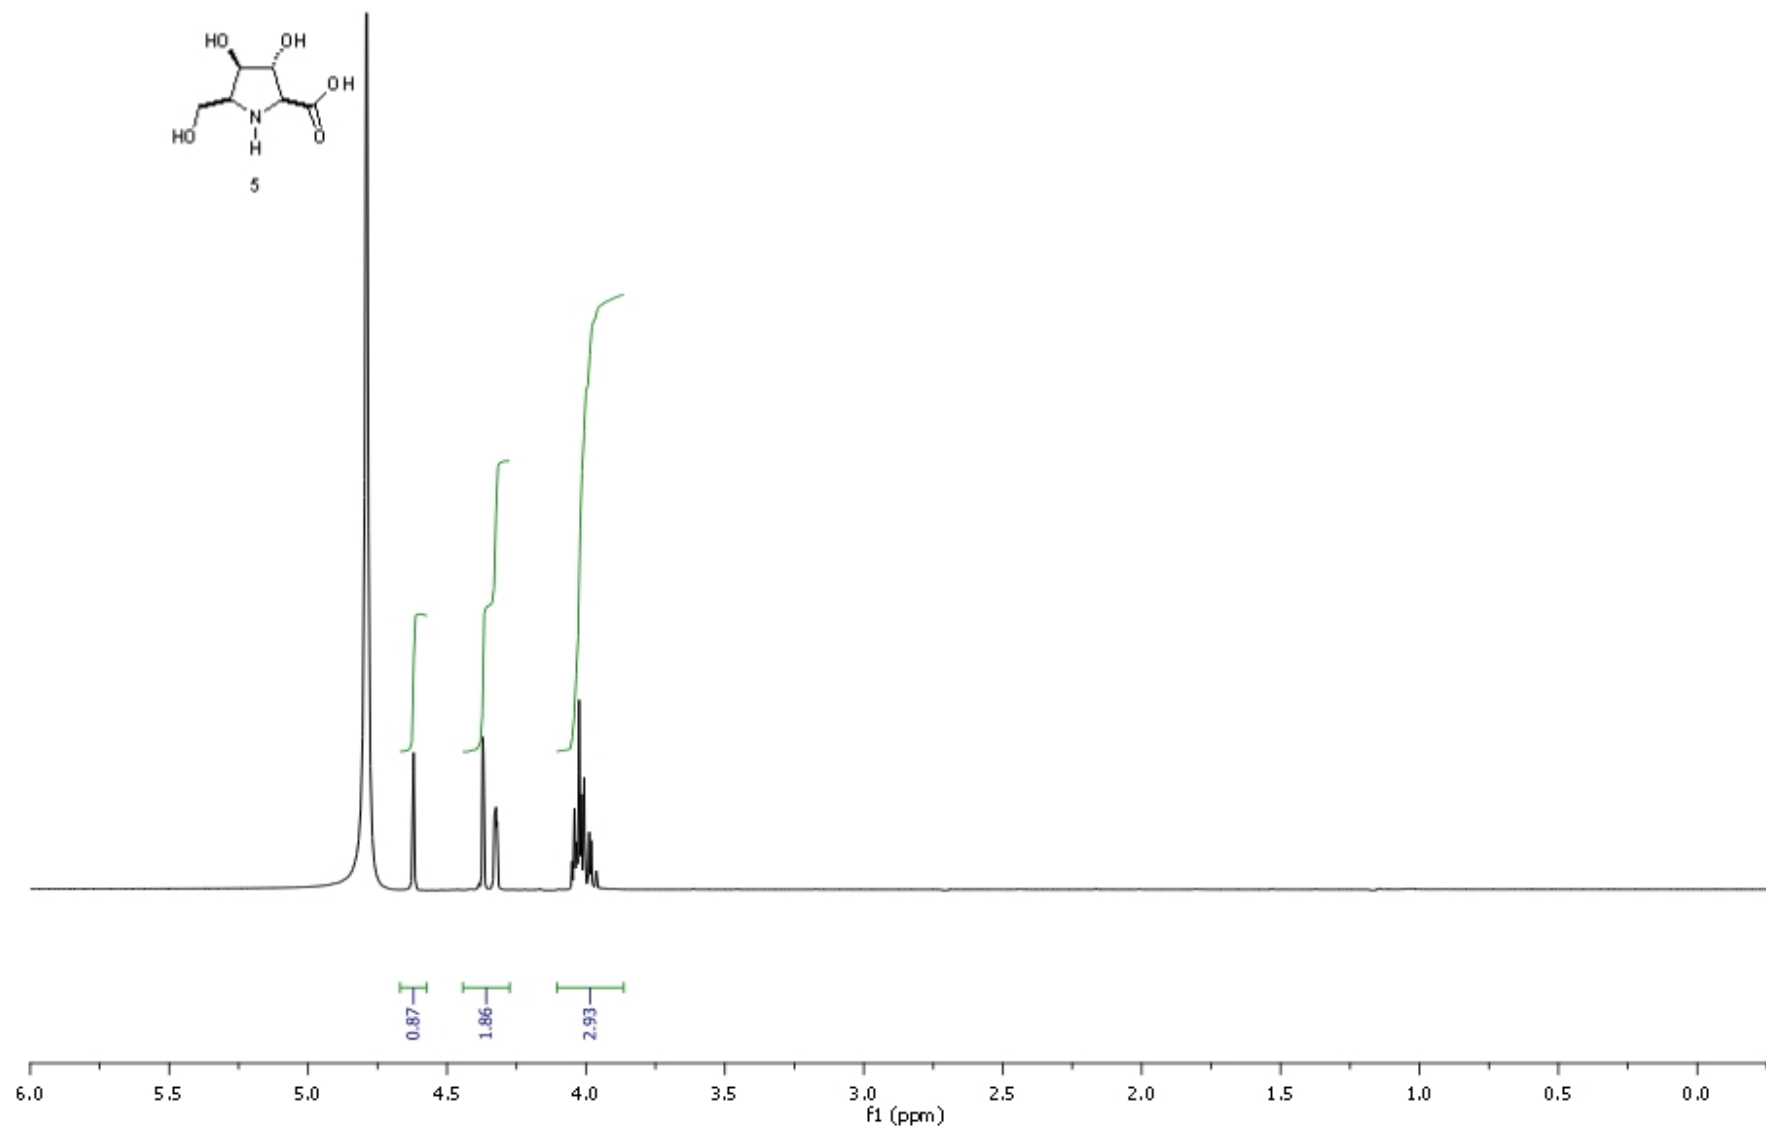

<sup>13</sup>C NMR (75 MHz, D<sub>2</sub>O + DCl)

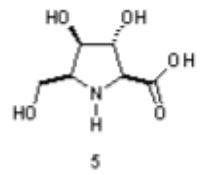

—79.1  
—75.1  
✓67.1  
—64.9  
—58.1

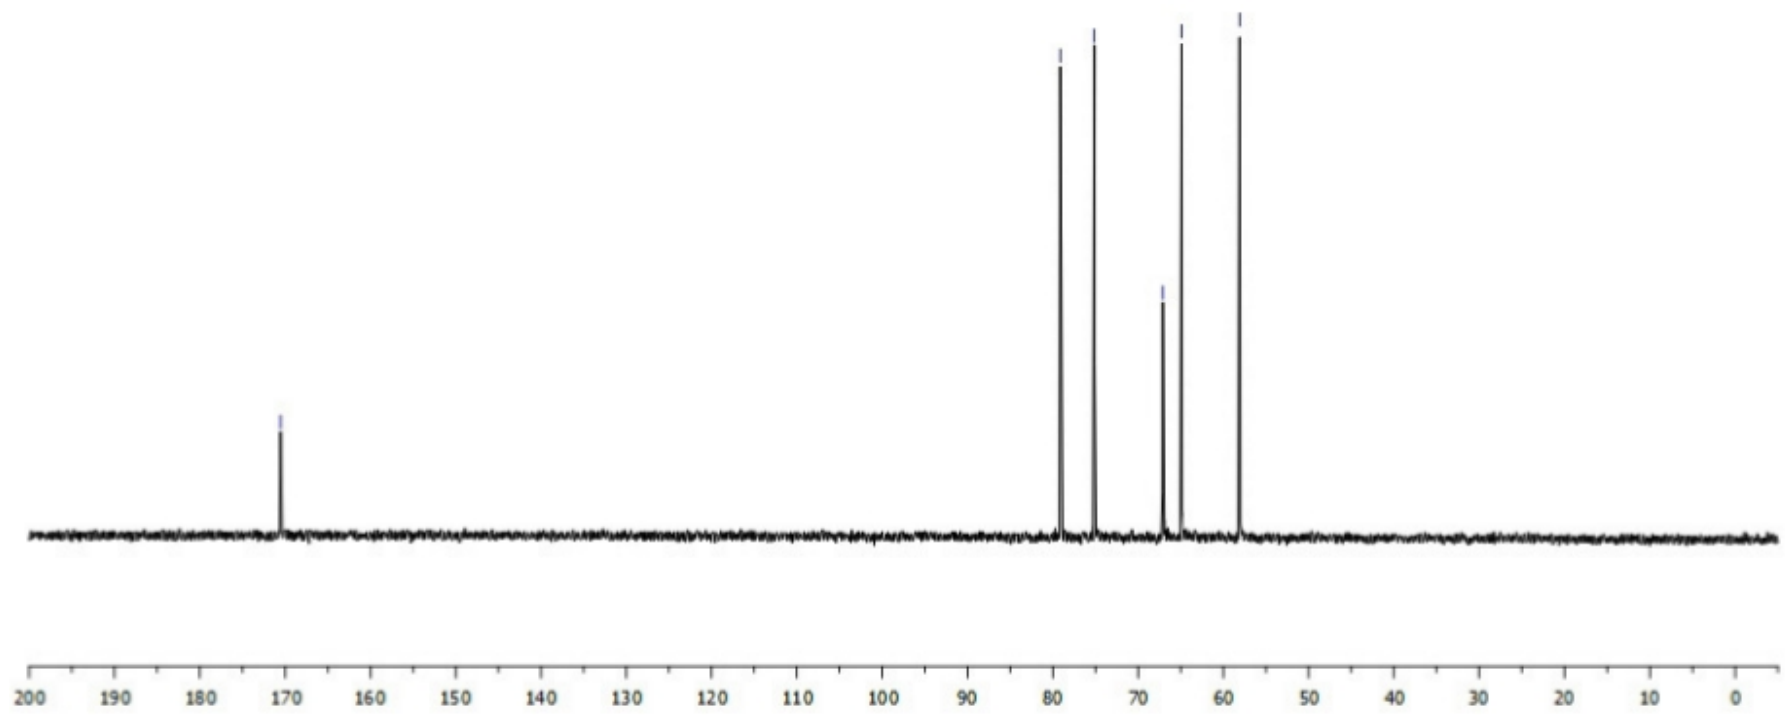



$^1\text{H}$  NMR (500 MHz,  $\text{D}_2\text{O}$ )

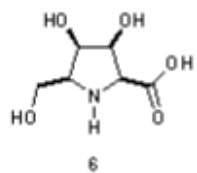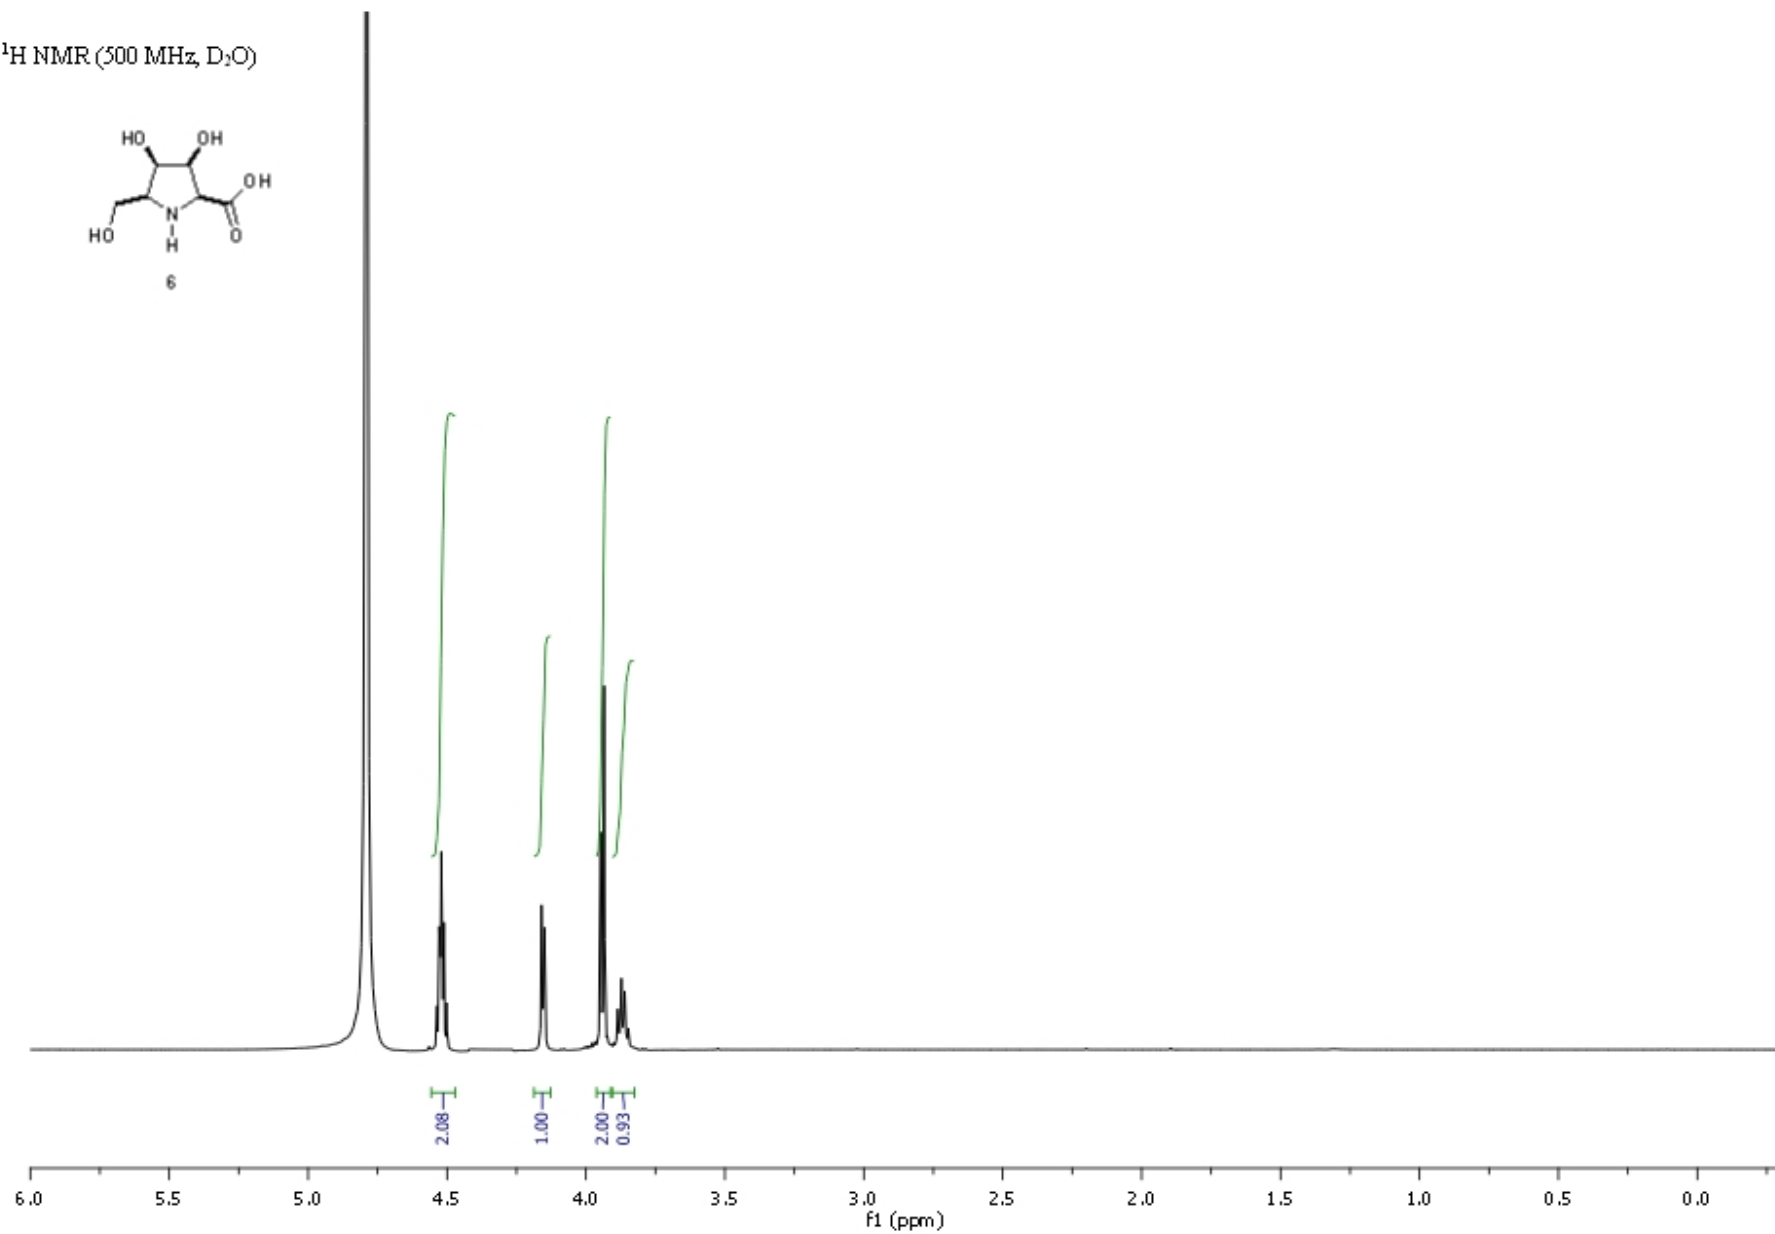

<sup>13</sup>C NMR (125 MHz, D<sub>2</sub>O) | 170.2

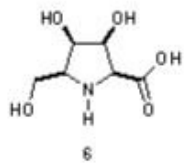

70.7  
70.6  
70.1  
62.7  
60.8  
57.4

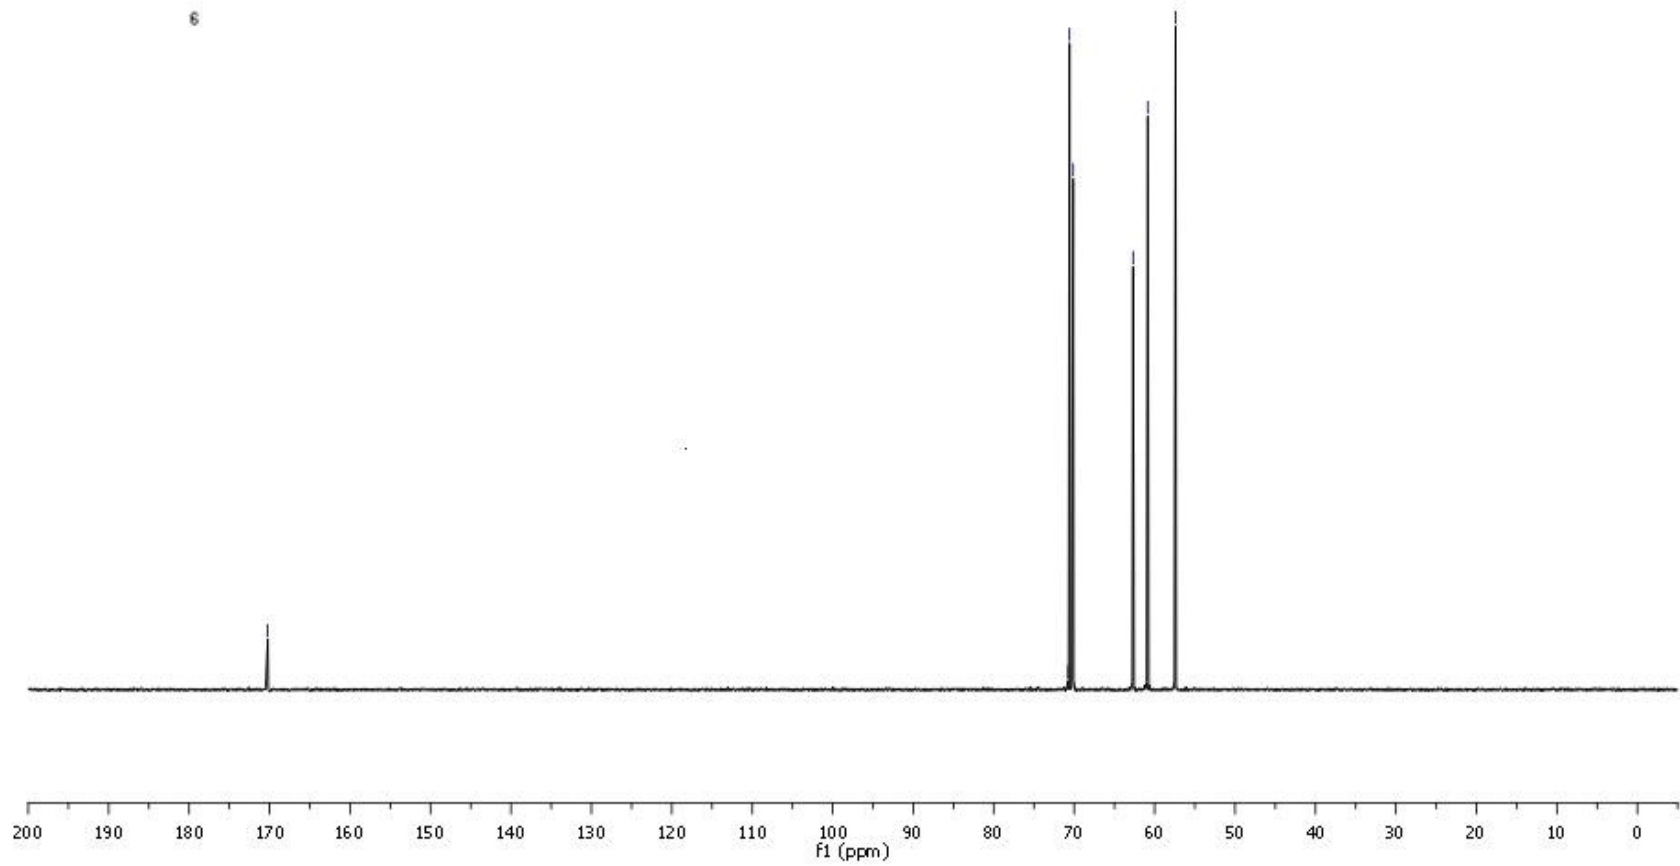

Supplement: b902366f.pdf [file b902366f.pdf]
